# Supplementary material for: CuBr2-catalyzed diastereoselective allylation: total synthesis of decytospolides A and B and their C6-epimers
Source: Royal Society of Chemistry journal article supplement (doi:10.1039/c9ob02689d), 2020-01-01
Supplement: c9ob02689d1.pdf [file c9ob02689d1.pdf]

*Supporting Information for*

## **CuBr<sub>2</sub>-Catalyzed Diastereoselective Allylation of Six-Membered Lactols: Total Synthesis of Decytospolides A and B and their C6-Epimers**

**Birakishore Padhi, G. Sudhakar Reddy, N. Arjunreddy Mallampudi, Utkal Mani Choudhury and Debendra K. Mohapatra\***

*Department of Organic Synthesis and Process Chemistry, CSIR-Indian Institute of Chemical Technology, Hyderabad 500007, India*

## Table of Contents

| S. No | Description                                               | Page No. |
|-------|-----------------------------------------------------------|----------|
| 1     | <sup>1</sup> H and <sup>13</sup> C NMR Copy of <b>10</b>  | S4-S5    |
| 2     | <sup>1</sup> H and <sup>13</sup> C NMR Copy of <b>11</b>  | S6-S7    |
| 3     | 2D <sup>1</sup> H NOE of compound <b>16</b>               | S8       |
| 4     | Expanded 2D <sup>1</sup> H NOE of compound <b>16</b>      | S9       |
| 5     | <sup>1</sup> H and <sup>13</sup> C NMR Copy of <b>11a</b> | S10-S11  |
| 6     | <sup>1</sup> H and <sup>13</sup> C NMR Copy of <b>11b</b> | S12-S13  |
| 7     | <sup>1</sup> H and <sup>13</sup> C NMR Copy of <b>11c</b> | S14-S15  |
| 8     | <sup>1</sup> H and <sup>13</sup> C NMR Copy of <b>11d</b> | S16-S17  |
| 9     | <sup>1</sup> H and <sup>13</sup> C NMR Copy of <b>11e</b> | S18-S19  |
| 10    | <sup>1</sup> H and <sup>13</sup> C NMR Copy of <b>11f</b> | S20-S21  |
| 11    | <sup>1</sup> H and <sup>13</sup> C NMR Copy of <b>11g</b> | S22-S23  |
| 12    | <sup>1</sup> H and <sup>13</sup> C NMR Copy of <b>11h</b> | S24-S25  |
| 13    | <sup>1</sup> H and <sup>13</sup> C NMR Copy of <b>11i</b> | S26-S27  |
| 14    | <sup>1</sup> H and <sup>13</sup> C NMR Copy of <b>11j</b> | S28-S29  |
| 15    | <sup>1</sup> H and <sup>13</sup> C NMR Copy of <b>11k</b> | S30-S31  |
| 16    | <sup>1</sup> H and <sup>13</sup> C NMR Copy of <b>11l</b> | S32-S33  |
| 17    | <sup>1</sup> H and <sup>13</sup> C NMR Copy of <b>20</b>  | S34-S35  |
| 18    | <sup>1</sup> H and <sup>13</sup> C NMR Copy of <b>21</b>  | S36-S37  |
| 19    | <sup>1</sup> H and <sup>13</sup> C NMR Copy of <b>22</b>  | S38-S39  |
| 20    | <sup>1</sup> H and <sup>13</sup> C NMR Copy of <b>23</b>  | S40-S41  |
| 21    | <sup>1</sup> H and <sup>13</sup> C NMR Copy of <b>18</b>  | S42-S43  |

|    |                                                           |         |
|----|-----------------------------------------------------------|---------|
| 22 | <sup>1</sup> H and <sup>13</sup> C NMR Copy of <b>24</b>  | S44-S45 |
| 23 | <sup>1</sup> H and <sup>13</sup> C NMR Copy of <b>10m</b> | S46-S47 |
| 24 | <sup>1</sup> H and <sup>13</sup> C NMR Copy of <b>11m</b> | S48-S49 |
| 25 | <sup>1</sup> H and <sup>13</sup> C NMR Copy of <b>25</b>  | S50-S51 |
| 26 | <sup>1</sup> H and <sup>13</sup> C NMR Copy of <b>17</b>  | S52-S53 |
| 27 | 2D <sup>1</sup> H NOE of compound <b>17</b>               | S54     |
| 28 | <sup>1</sup> H and <sup>13</sup> C NMR Copy of <b>14</b>  | S55-S56 |
| 29 | <sup>1</sup> H and <sup>13</sup> C NMR Copy of <b>15</b>  | S57-S58 |
| 30 | <sup>1</sup> H and <sup>13</sup> C NMR Copy of <b>16</b>  | S59-S60 |
| 31 | 2D <sup>1</sup> H NOE of compound <b>16</b>               | S61     |
| 32 | <sup>1</sup> H and <sup>13</sup> C NMR Copy of <b>12</b>  | S62-S63 |
| 33 | <sup>1</sup> H and <sup>13</sup> C NMR Copy of <b>13</b>  | S64-S65 |

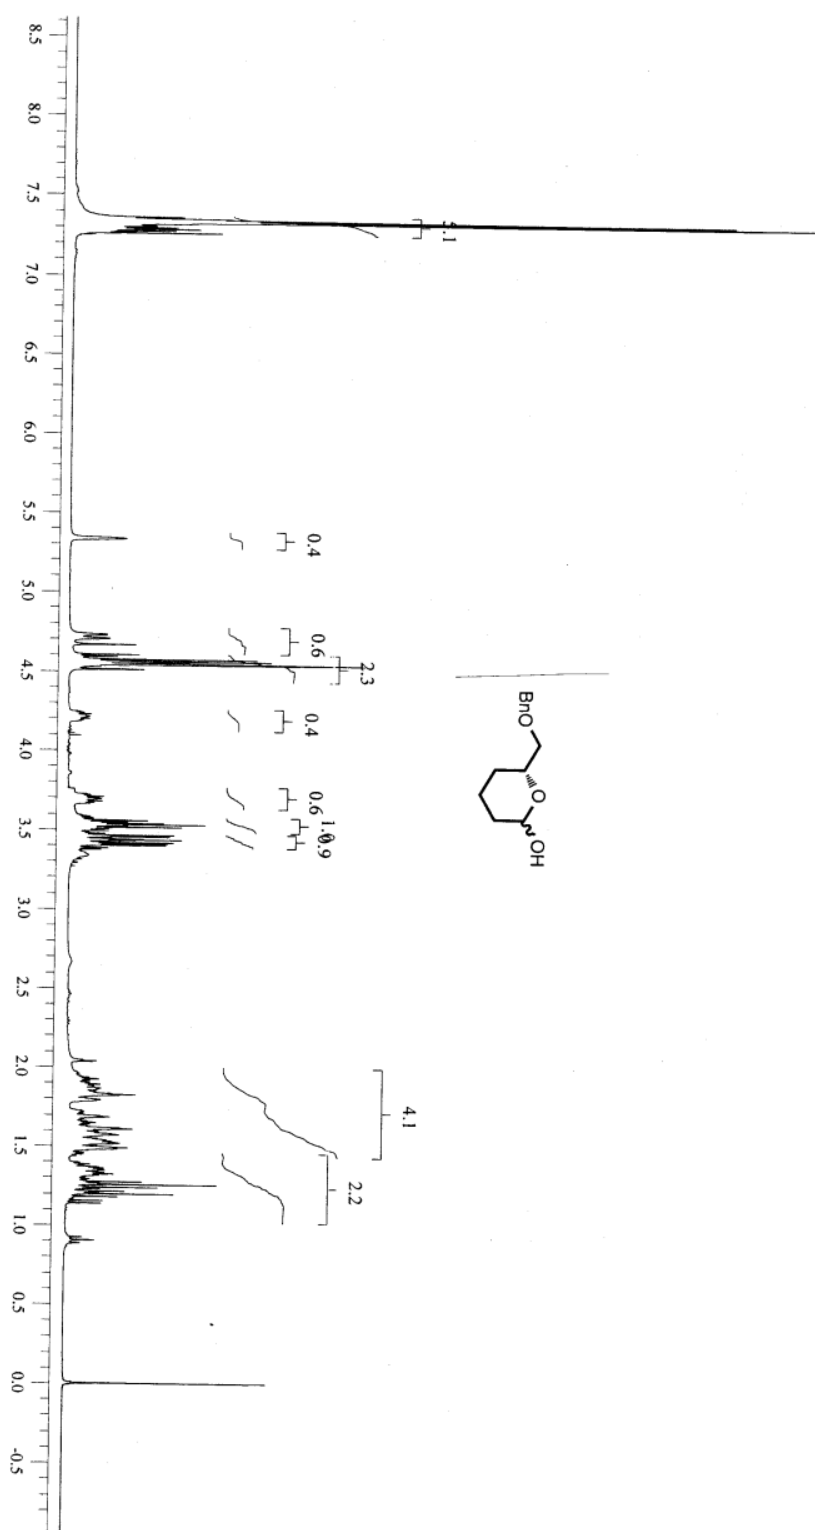

$^1\text{H}$  NMR Spectrum of Compound 10 (400 MHz,  $\text{CDCl}_3$ )

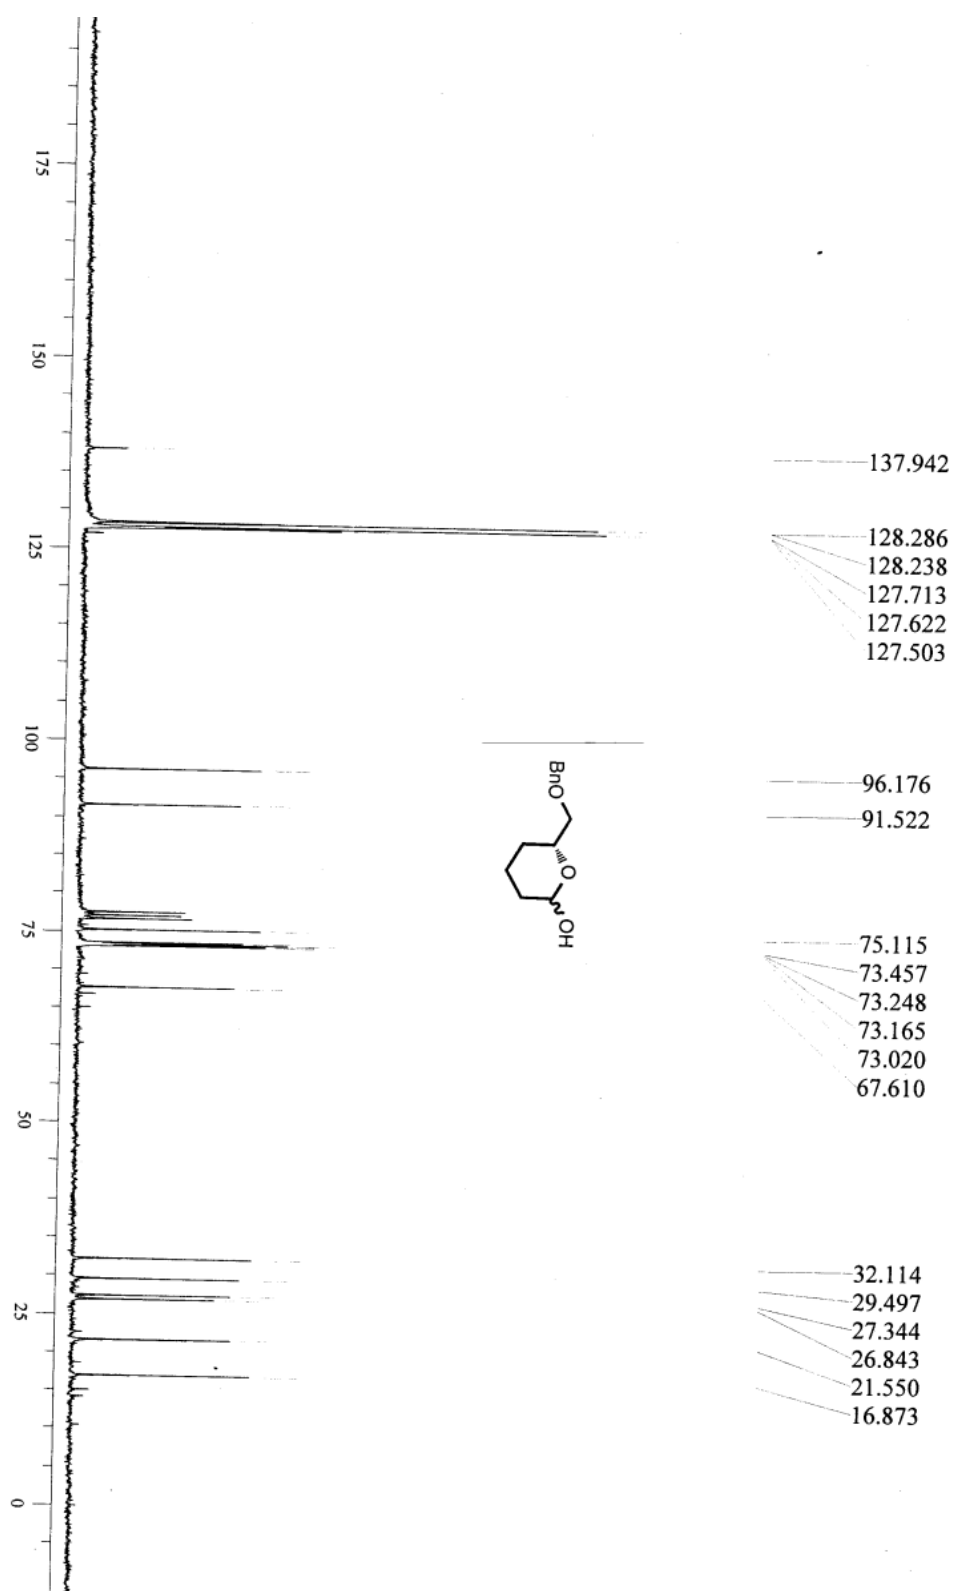

<sup>13</sup>C NMR Spectrum of Compound 10 (75 MHz, CDCl<sub>3</sub>)

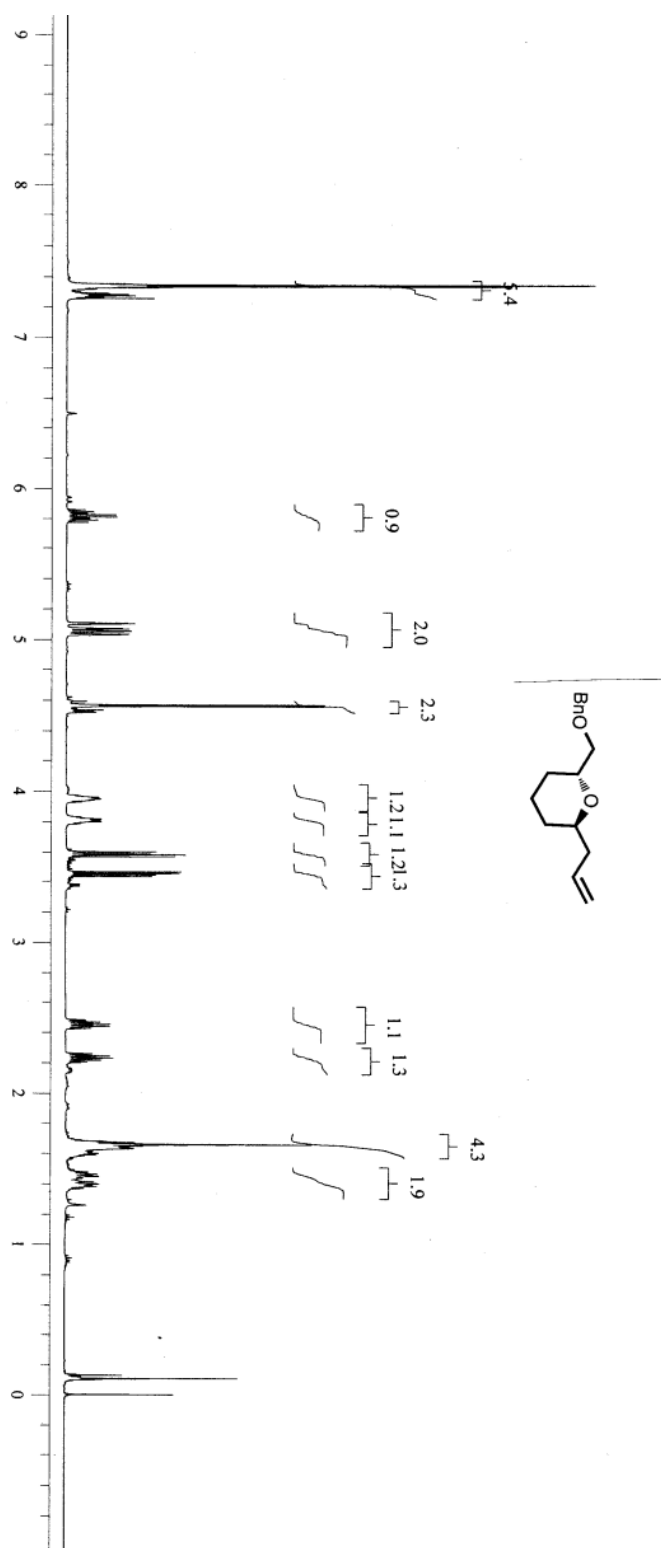

$^1\text{H}$  NMR Spectrum of Compound 11 (300 MHz,  $\text{CDCl}_3$ )

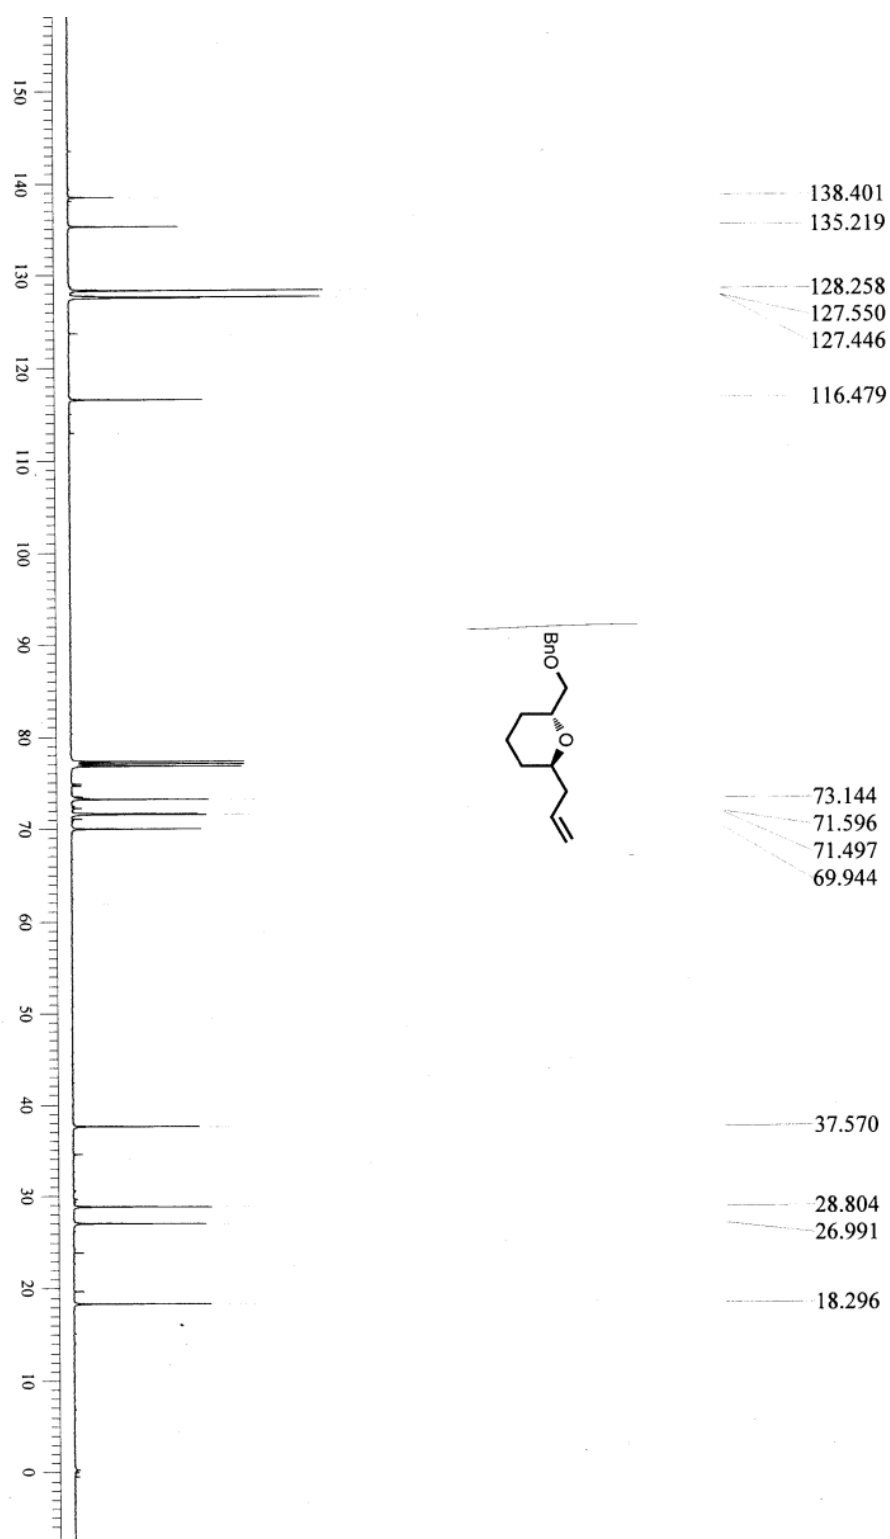

$^{13}\text{C}$  NMR Spectrum of Compound 11 (125 MHz,  $\text{CDCl}_3$ )

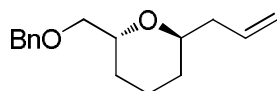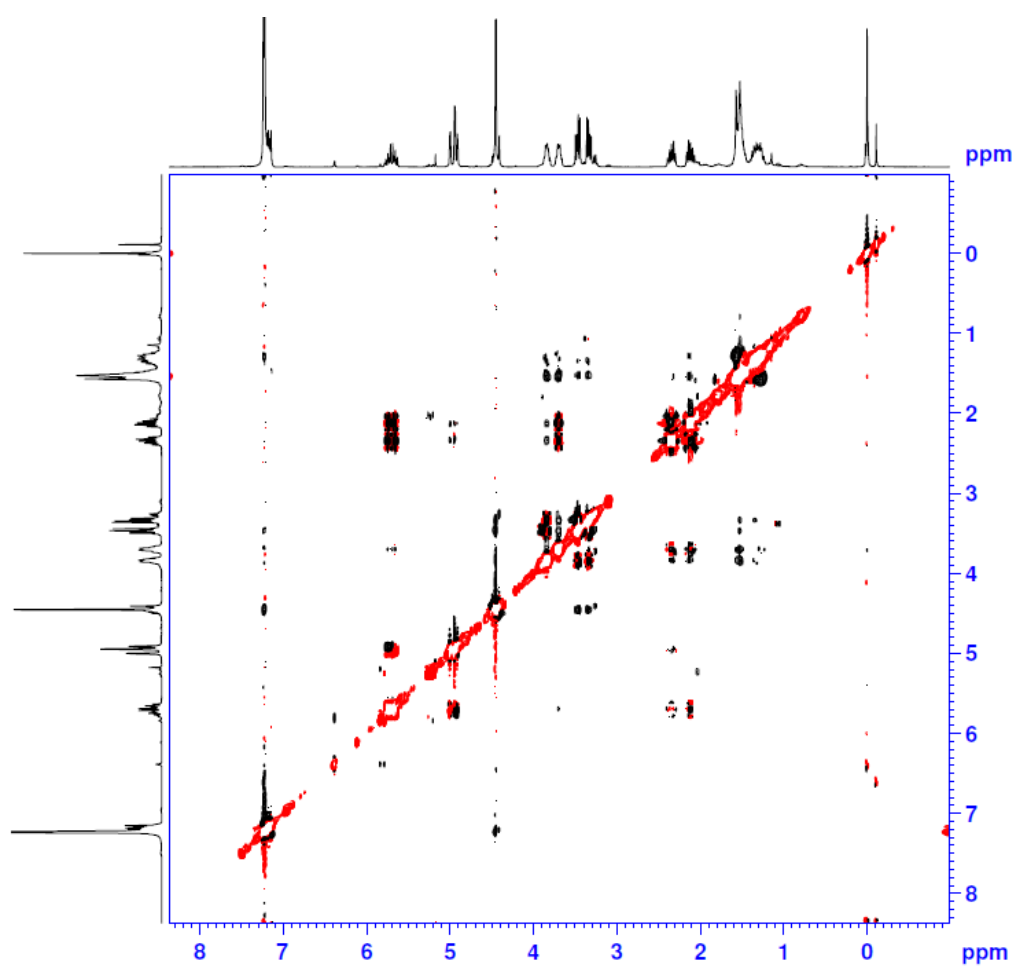

2D  $^1\text{H}$  NOE of Compound 11 (300 MHz,  $\text{CDCl}_3$ )



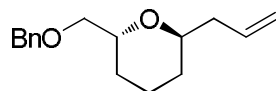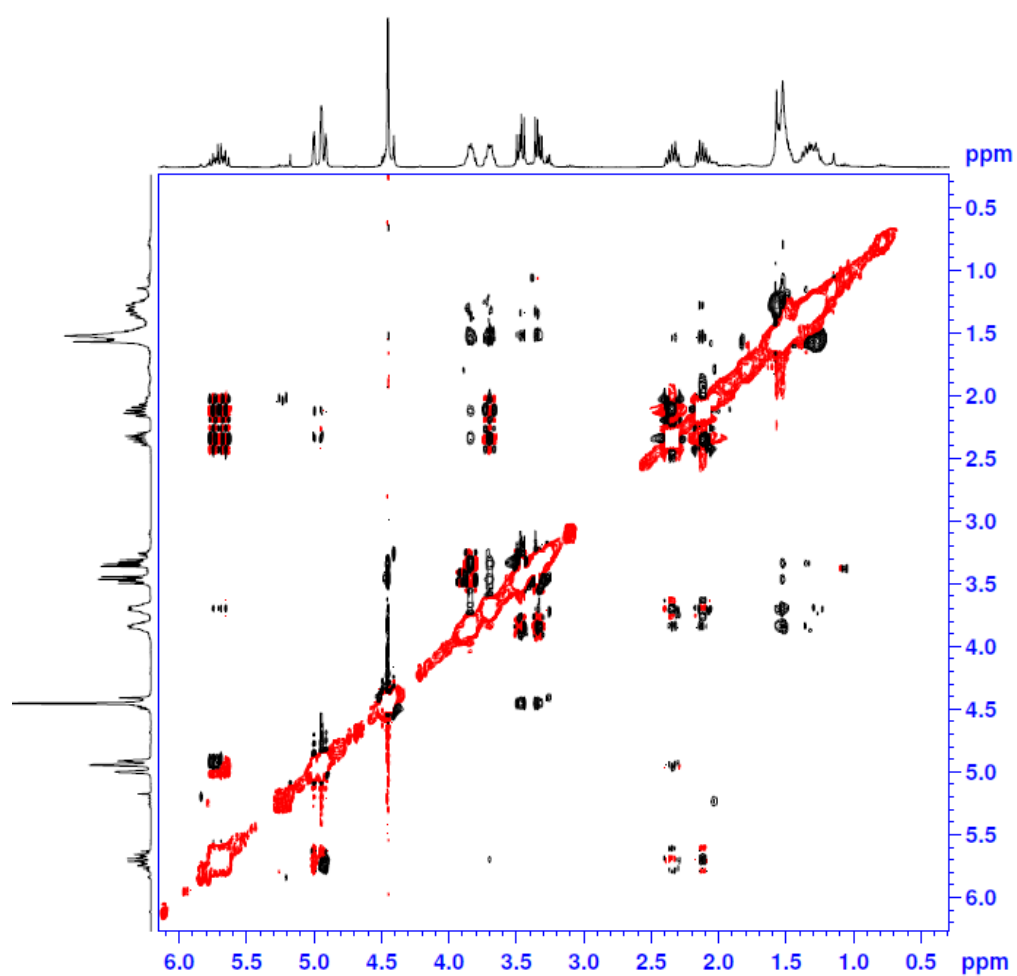

Expanded 2D  $^1\text{H}$  NOE of Compound 11 (300 MHz,  $\text{CDCl}_3$ )

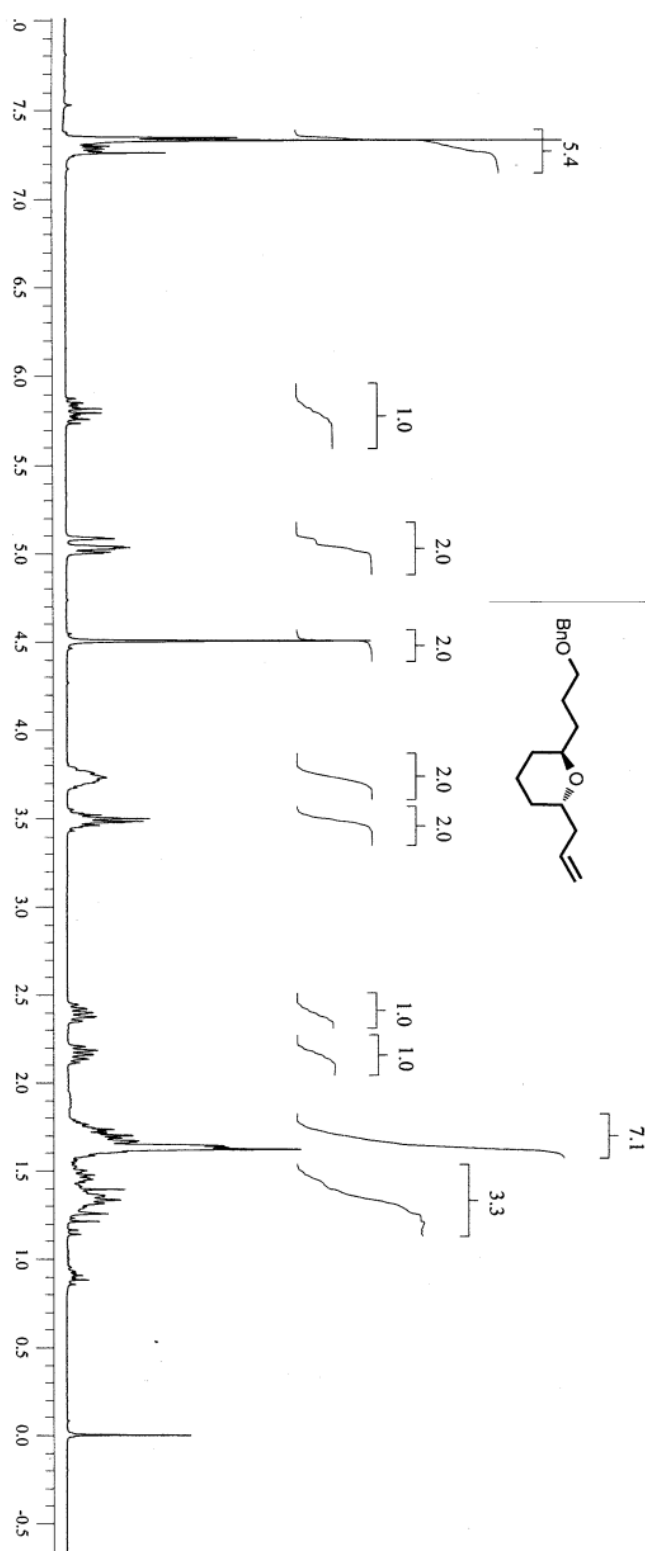

$^1\text{H}$  NMR Spectrum of Compound 11a (300 MHz,  $\text{CDCl}_3$ )

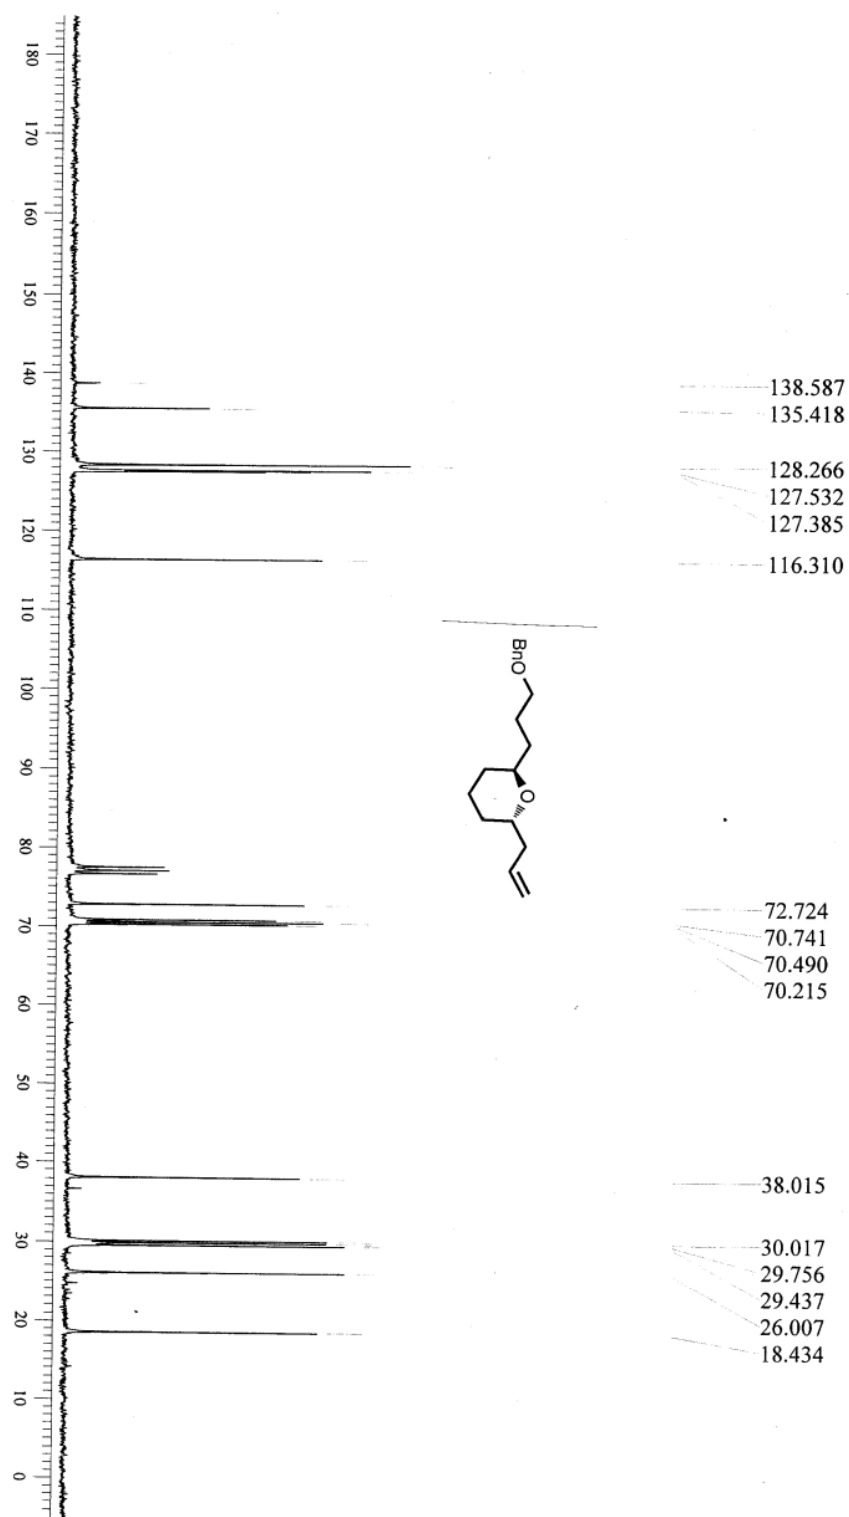

<sup>13</sup>C NMR Spectrum of Compound 11a (75 MHz, CDCl<sub>3</sub>)

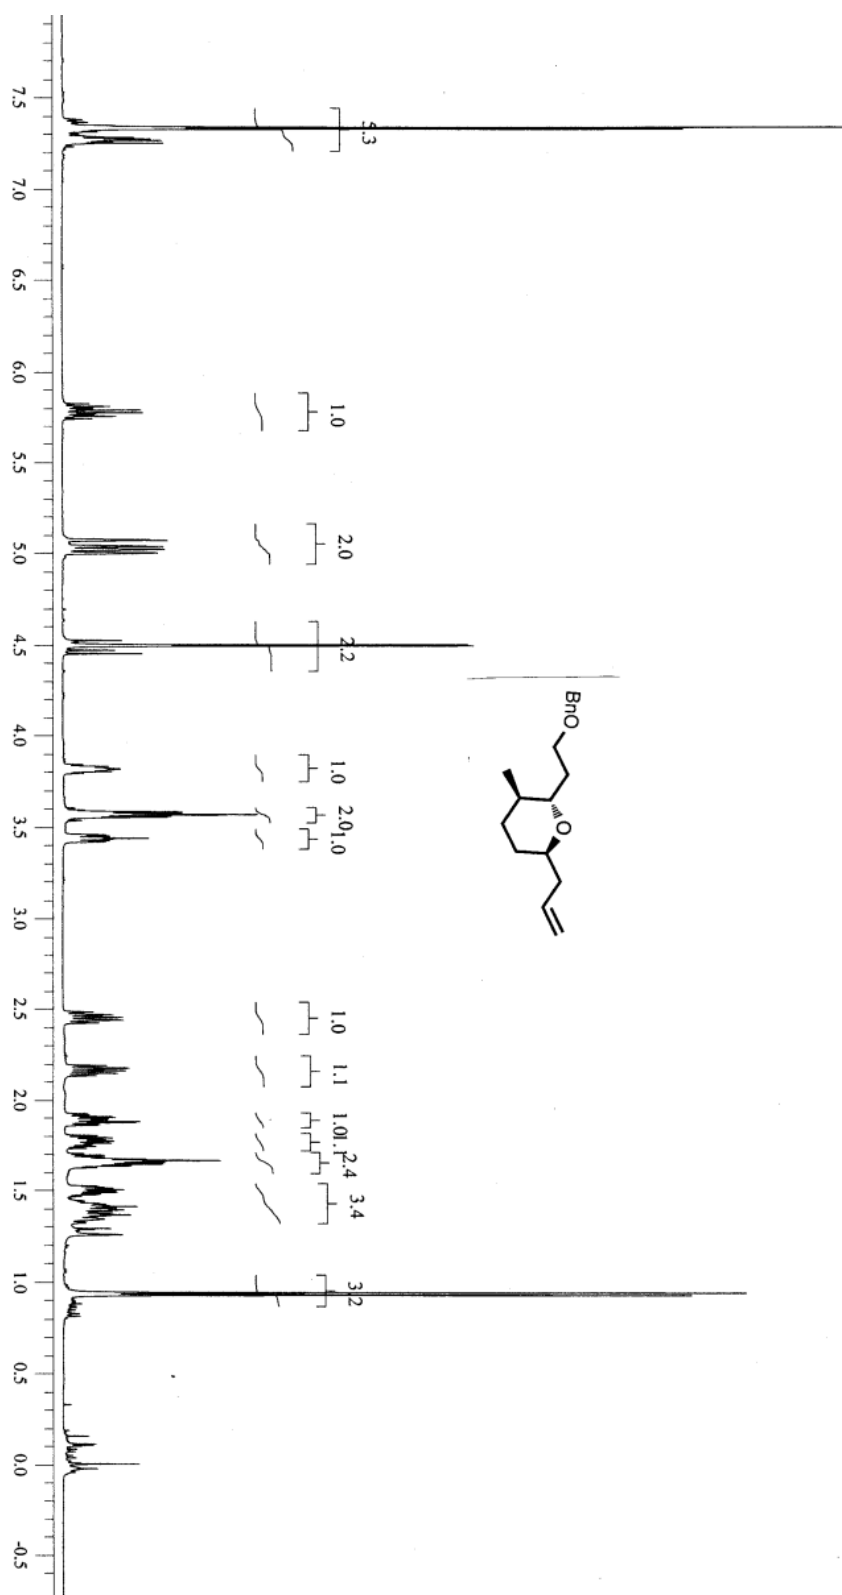

$^1\text{H}$  NMR Spectrum of Compound 11b (300 MHz,  $\text{CDCl}_3$ )

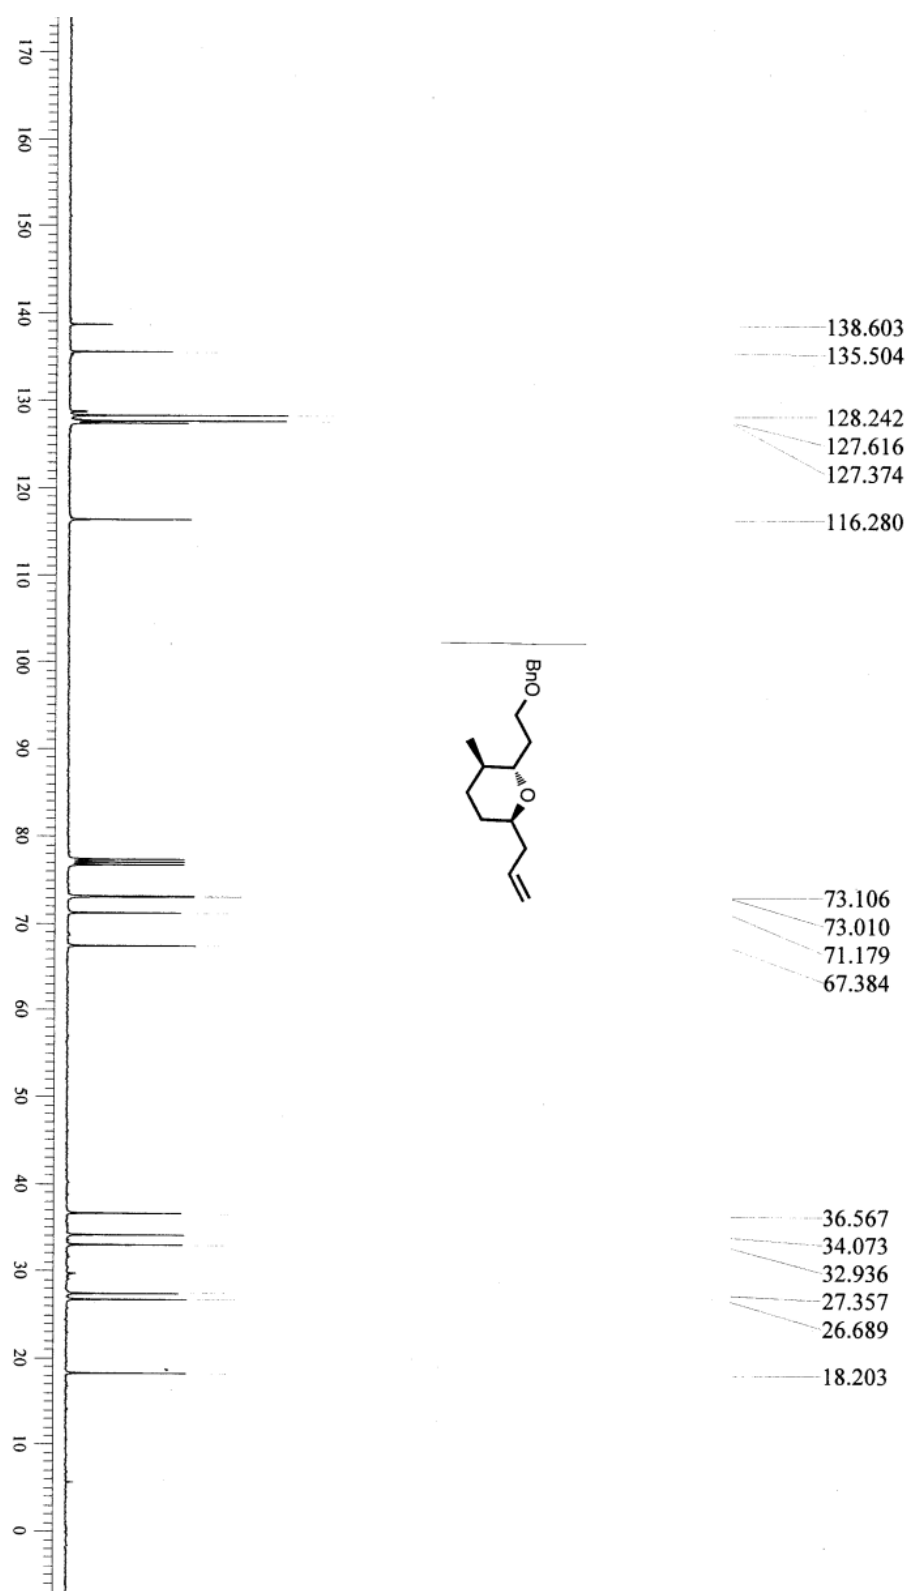

**<sup>13</sup>C NMR Spectrum of Compound 11b (100 MHz, CDCl<sub>3</sub>)**

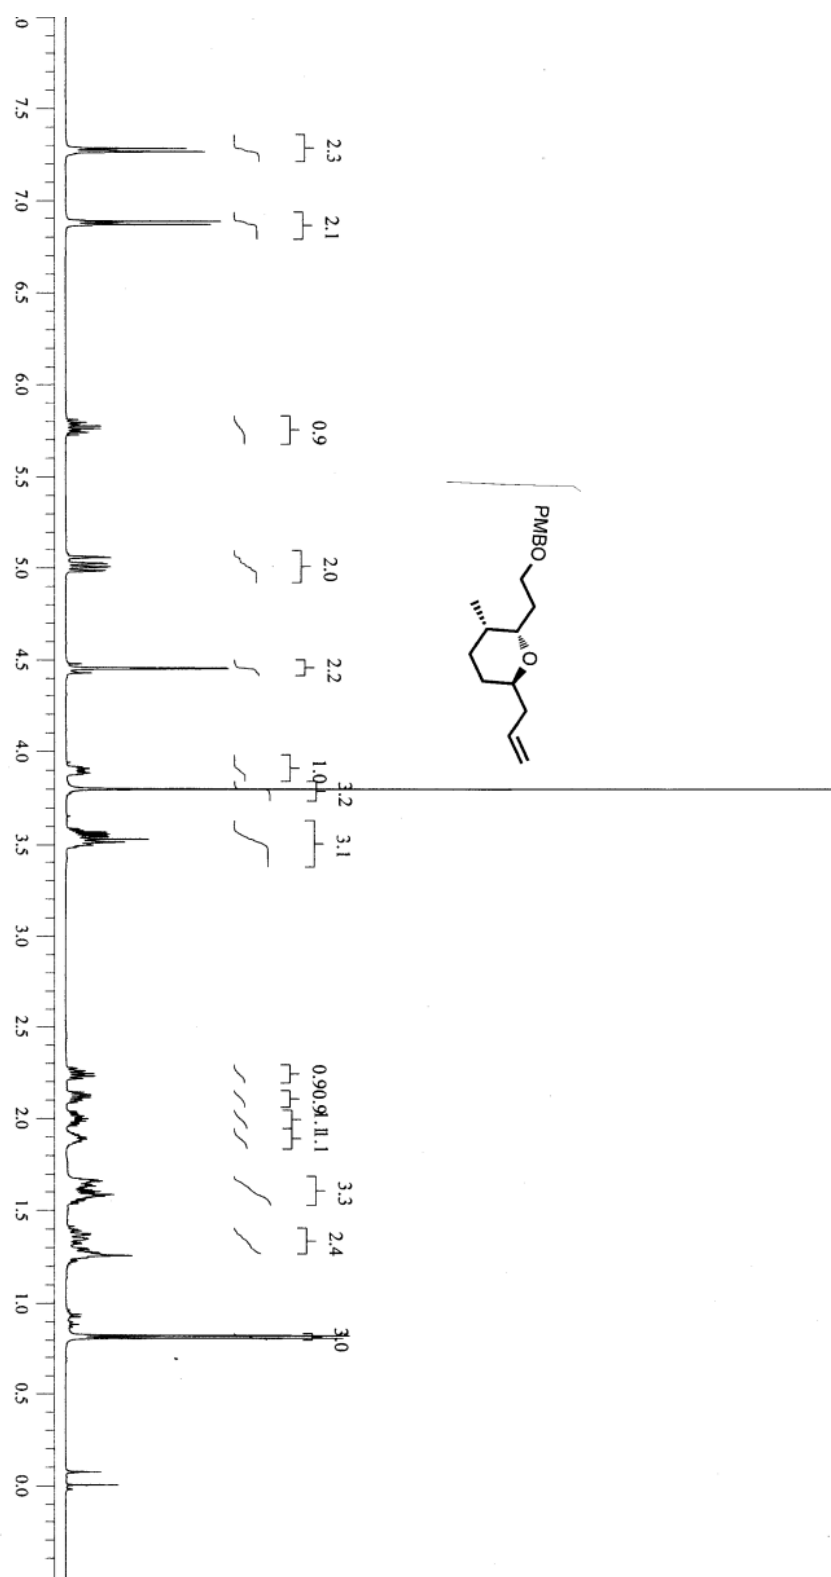

$^1\text{H}$  NMR Spectrum of Compound 11c (500 MHz,  $\text{CDCl}_3$ )

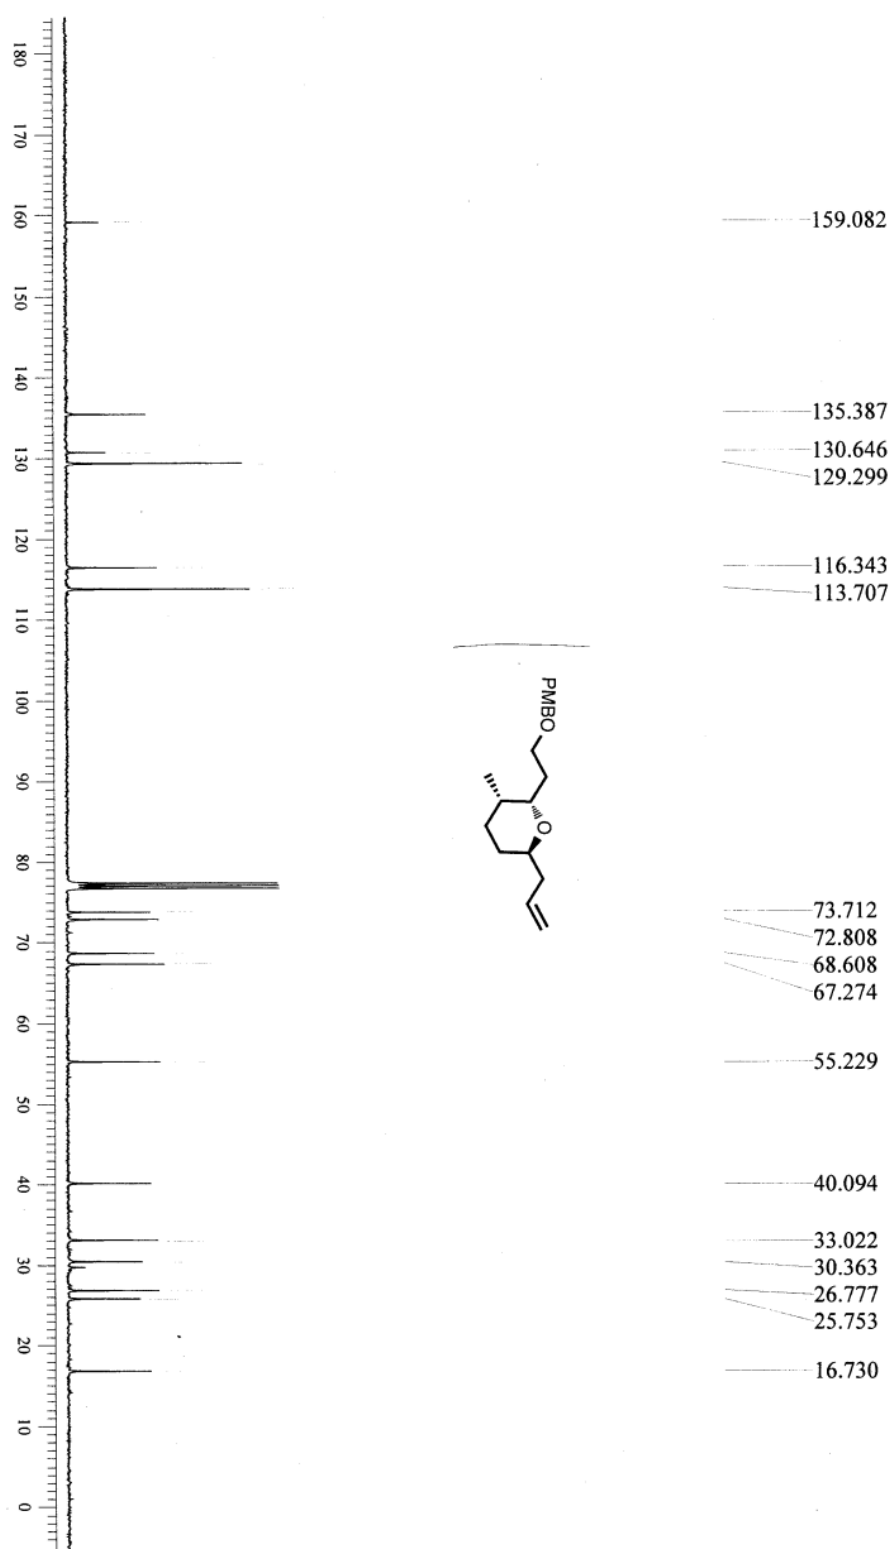

**<sup>13</sup>C NMR Spectrum of Compound 11c (100 MHz, CDCl<sub>3</sub>)**

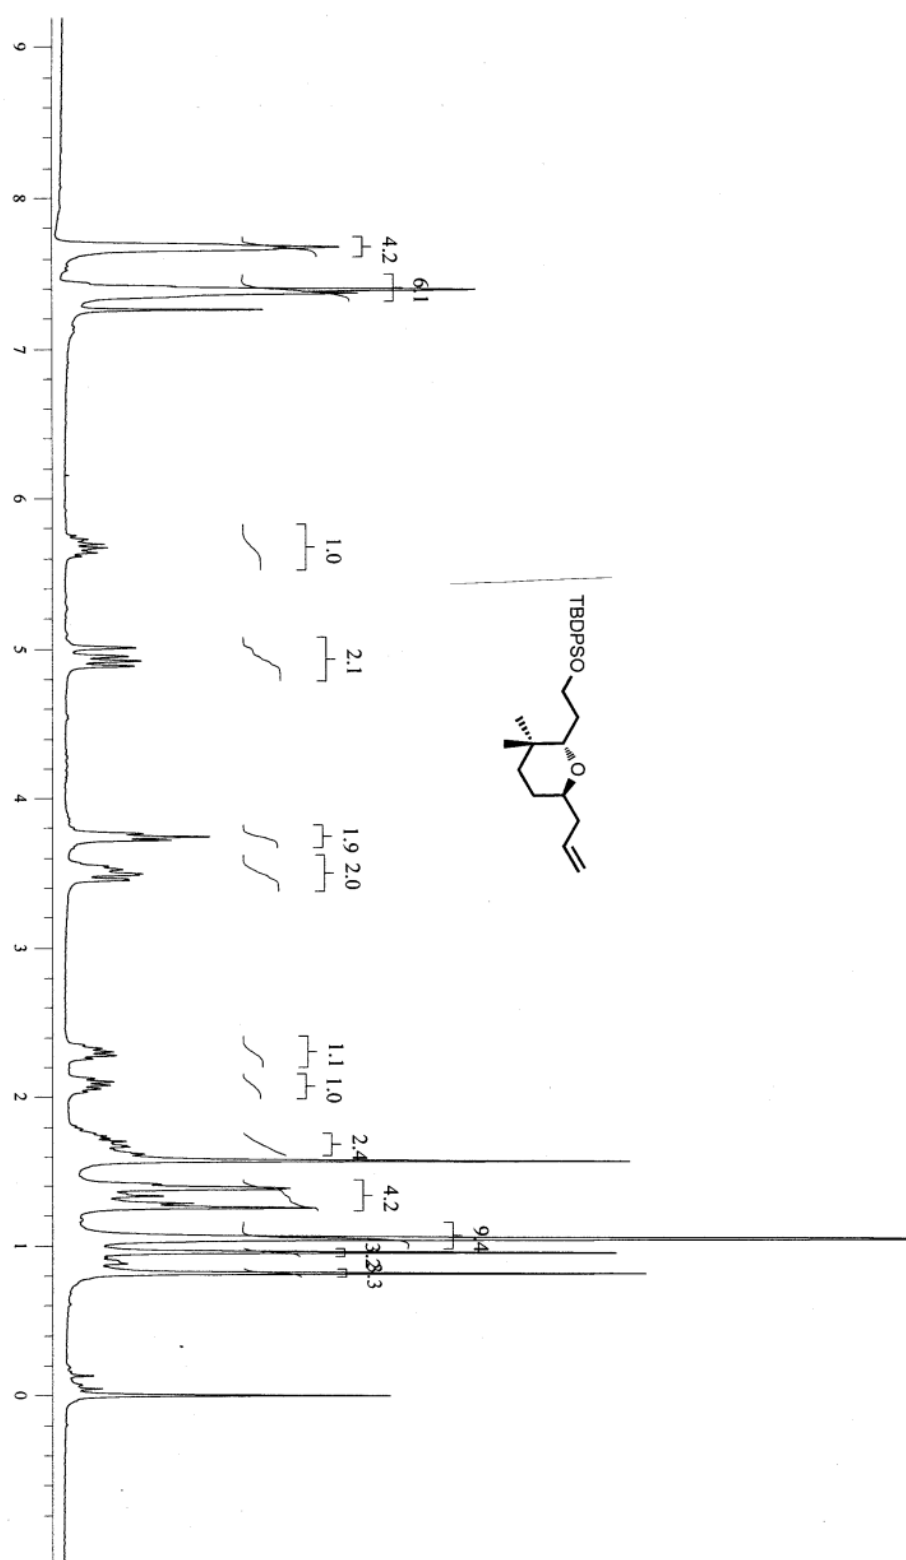

$^1\text{H}$  NMR Spectrum of Compound 11d (300 MHz,  $\text{CDCl}_3$ )



**$^{13}\text{C}$  NMR Spectrum of Compound 11d (75 MHz,  $\text{CDCl}_3$ )**

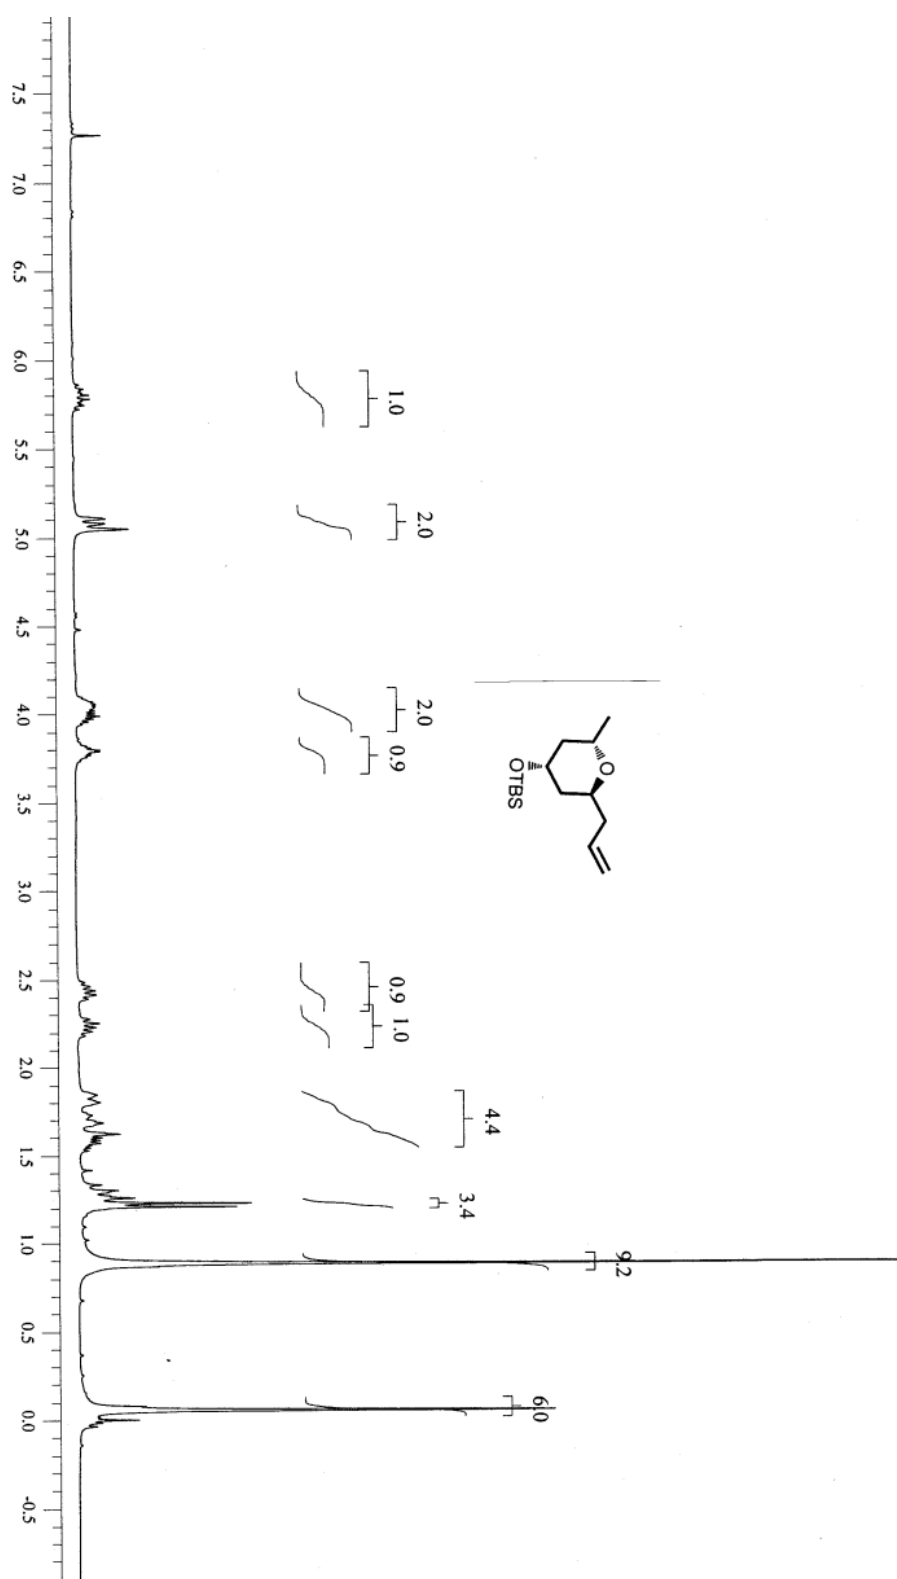

$^1\text{H}$  NMR Spectrum of Compound 11e (300 MHz,  $\text{CDCl}_3$ )

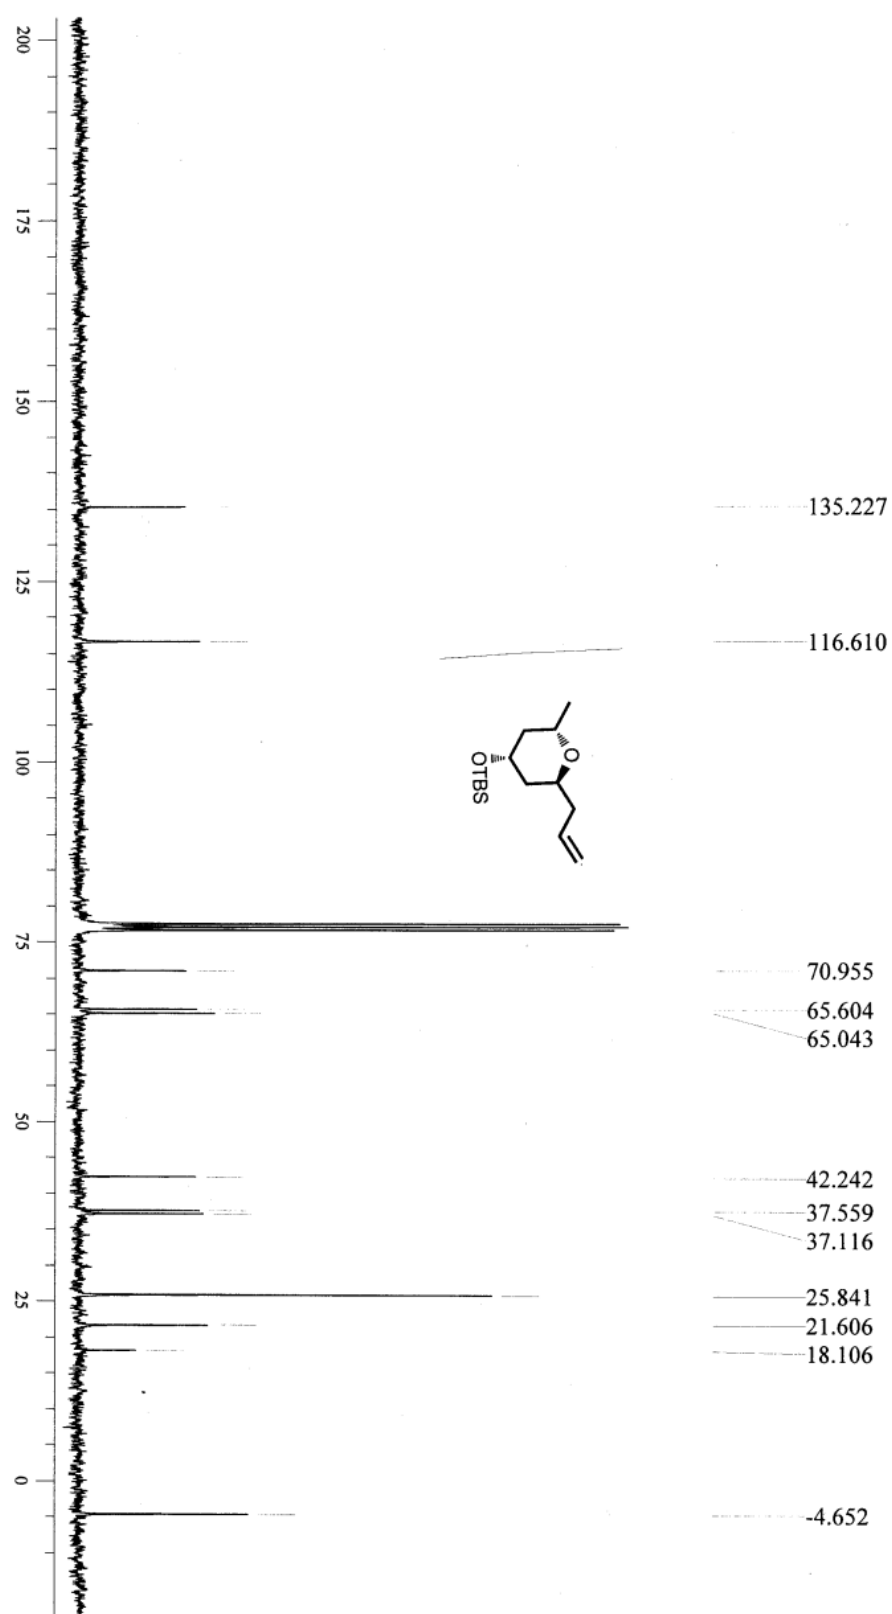

$^{13}\text{C}$  NMR Spectrum of Compound 11e (75 MHz,  $\text{CDCl}_3$ )

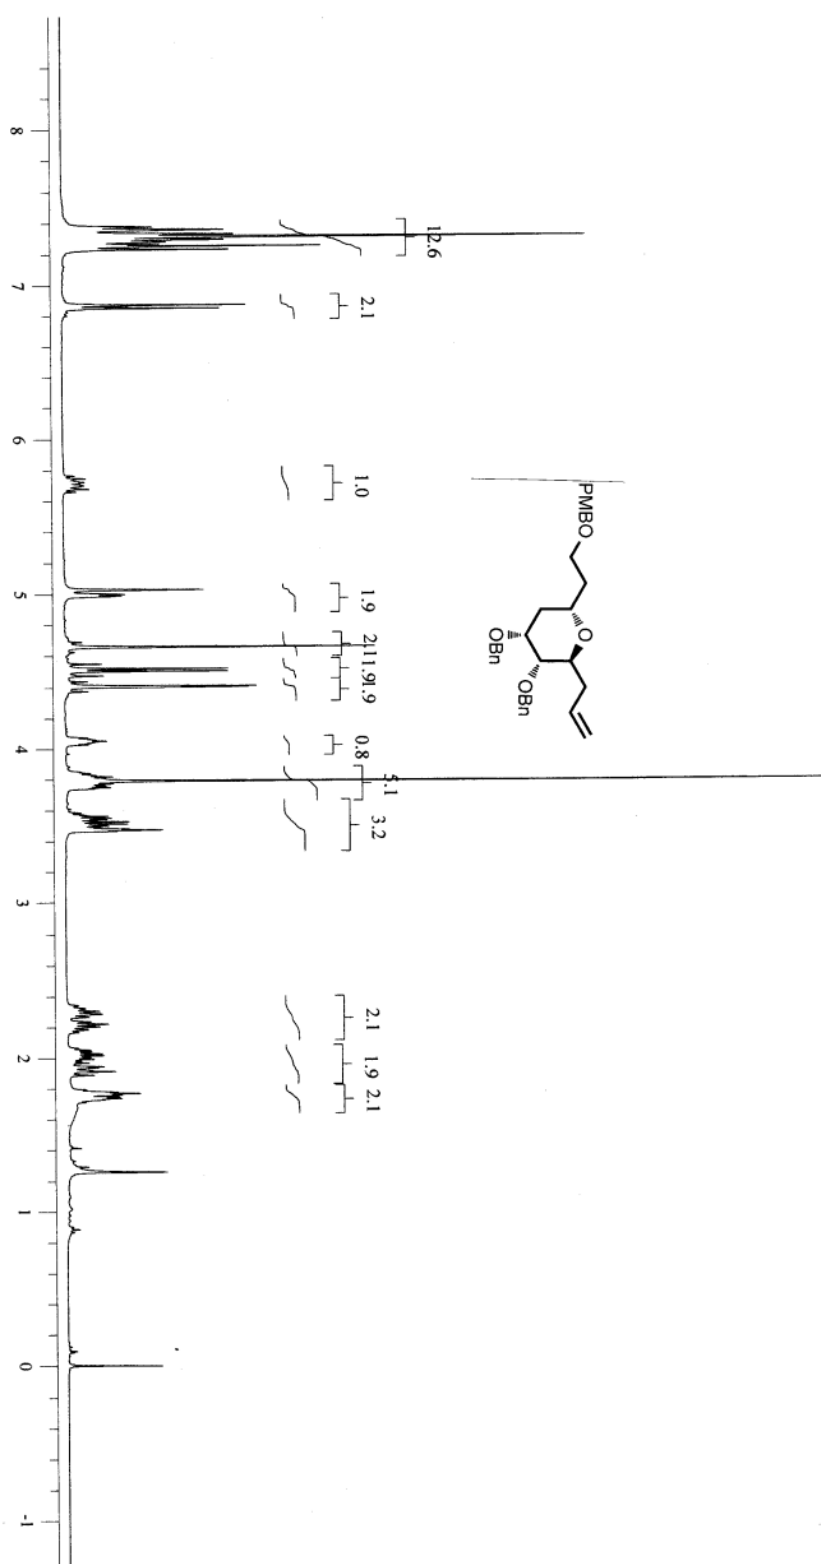

$^1\text{H}$  NMR Spectrum of Compound 11f (400 MHz,  $\text{CDCl}_3$ )

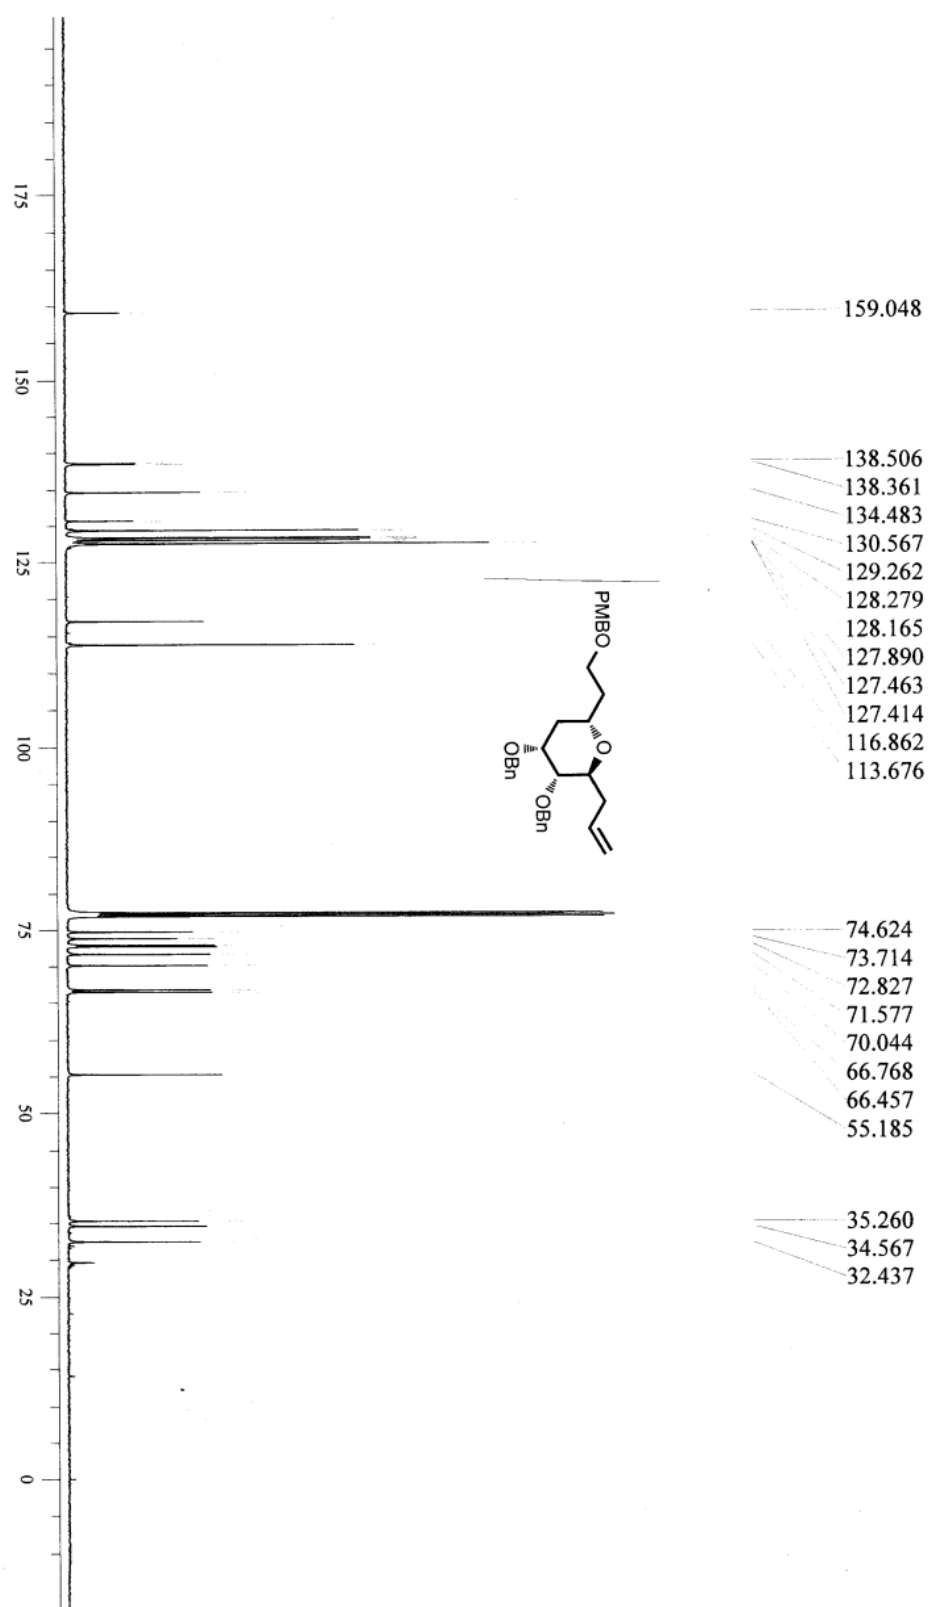

**<sup>13</sup>C NMR Spectrum of Compound 11f (125 MHz, CDCl<sub>3</sub>)**

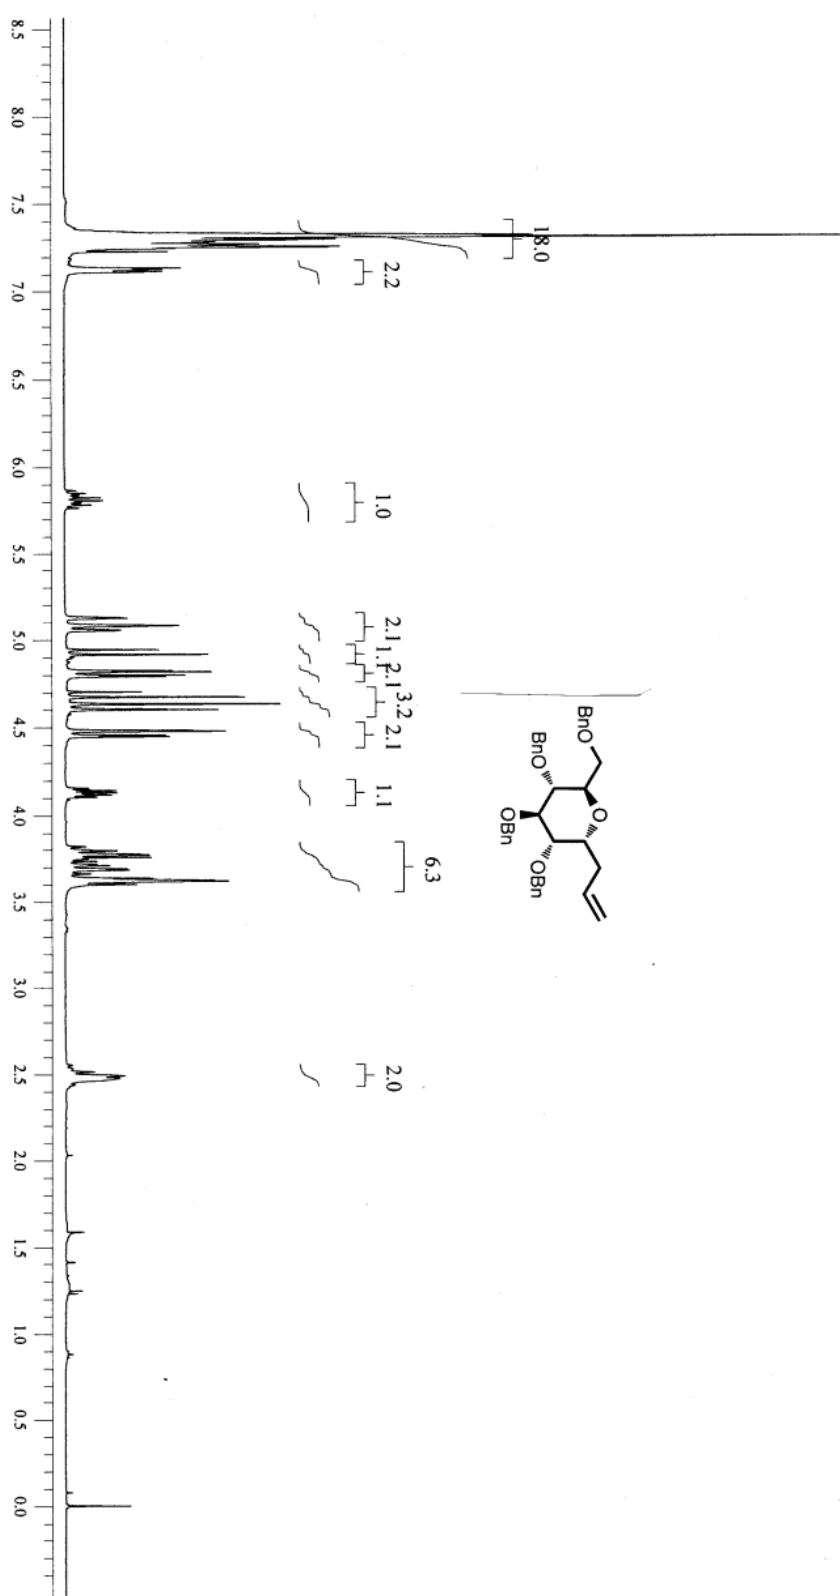

$^1\text{H}$  NMR Spectrum of Compound 11g (400 MHz,  $\text{CDCl}_3$ )

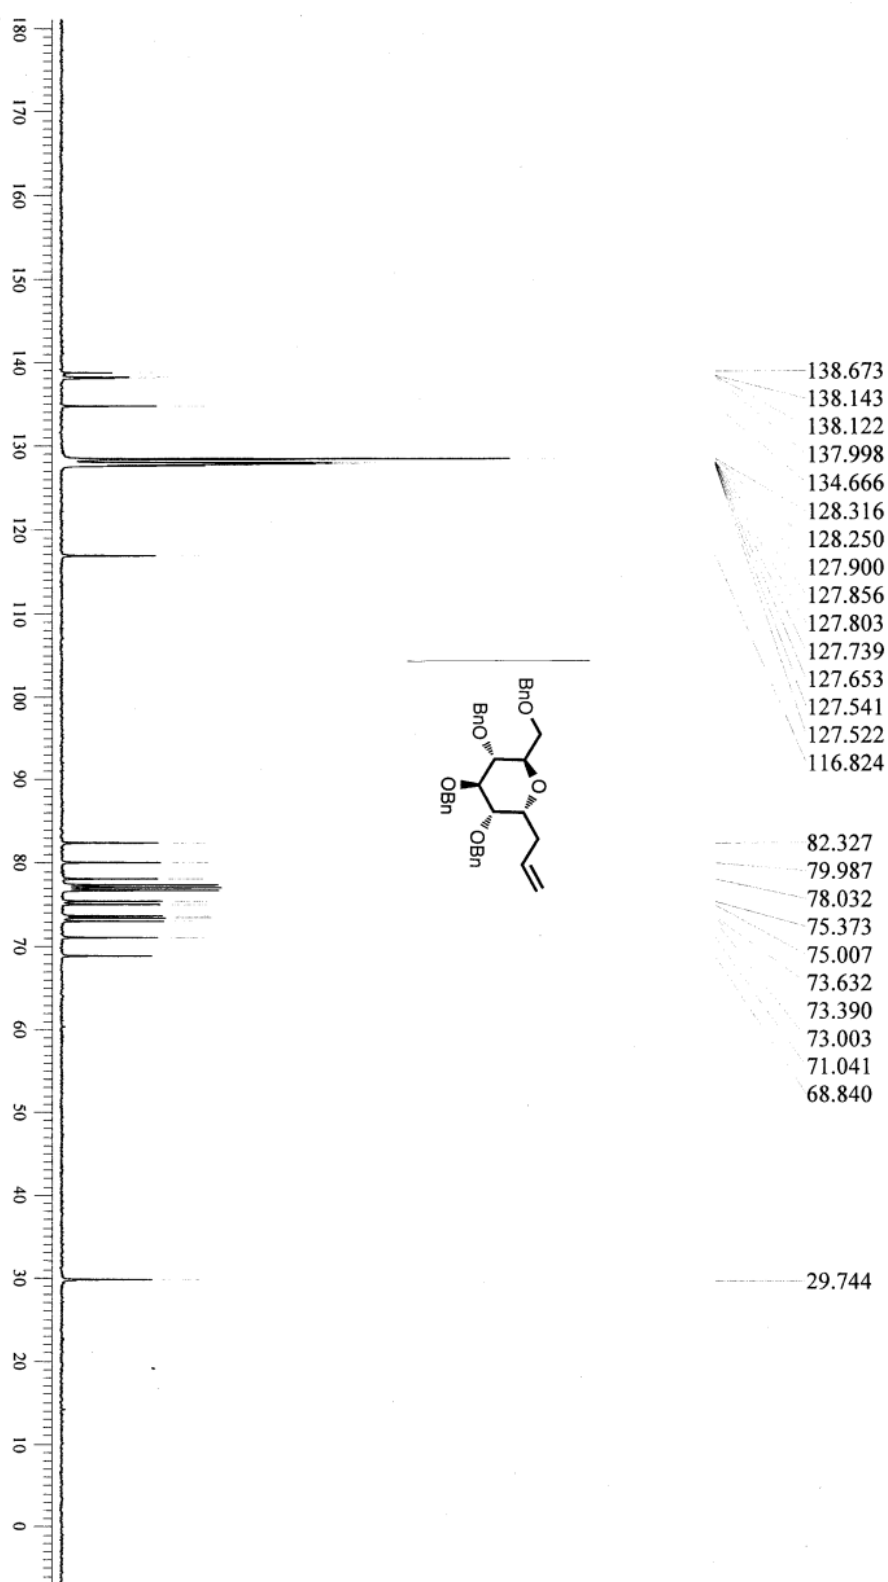

<sup>13</sup>C NMR Spectrum of Compound 11g (100 MHz, CDCl<sub>3</sub>)

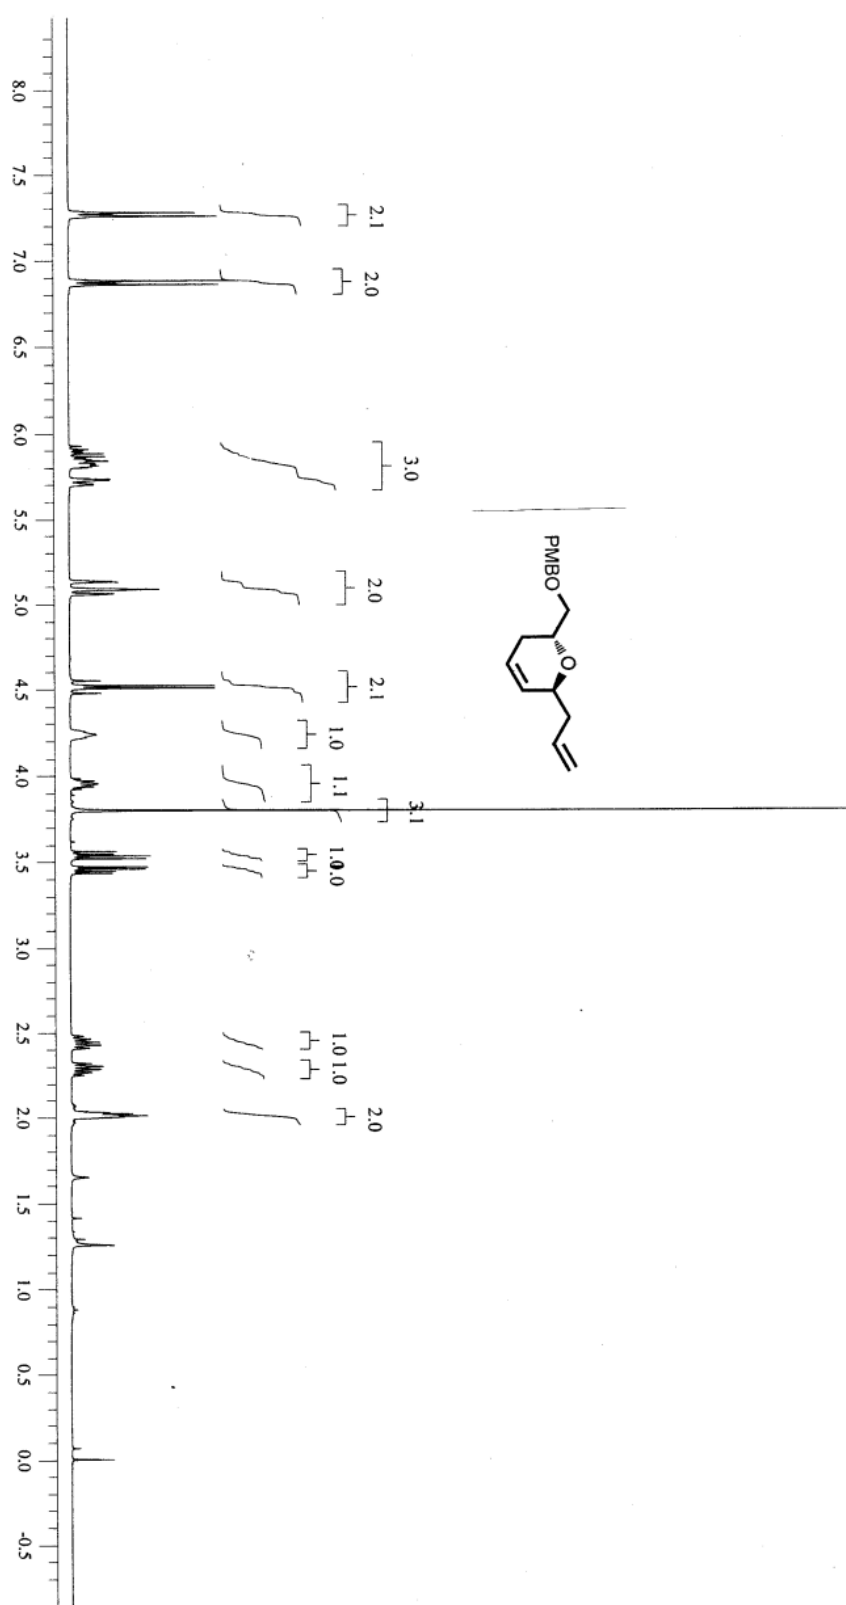

$^1\text{H}$  NMR Spectrum of Compound 11h (400 MHz,  $\text{CDCl}_3$ )



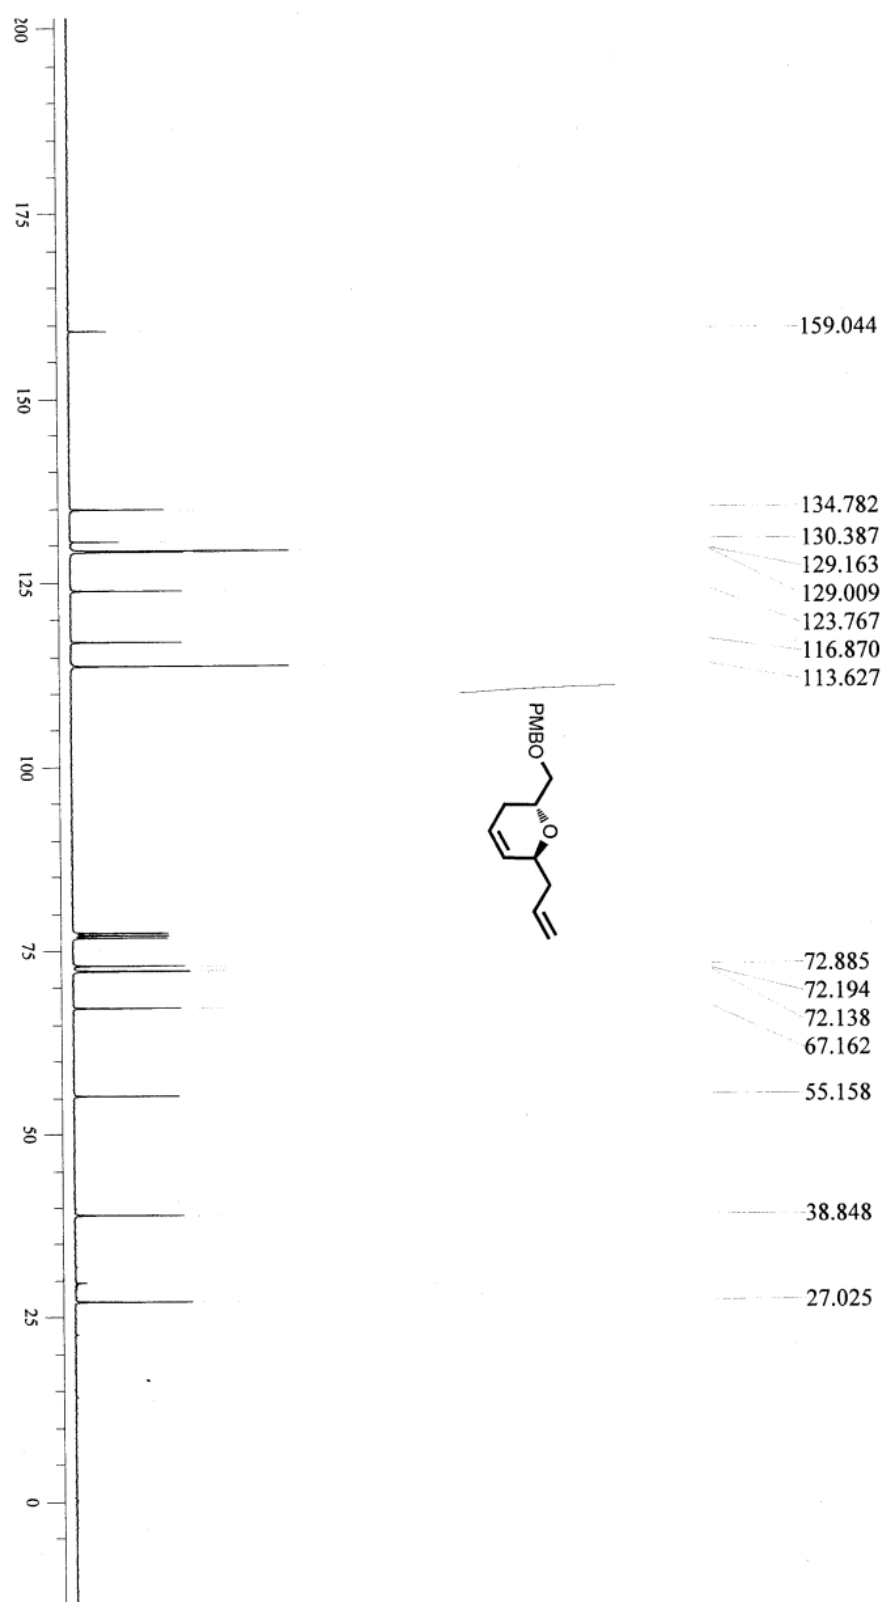

$^{13}\text{C}$  NMR Spectrum of Compound 11h (100 MHz,  $\text{CDCl}_3$ )

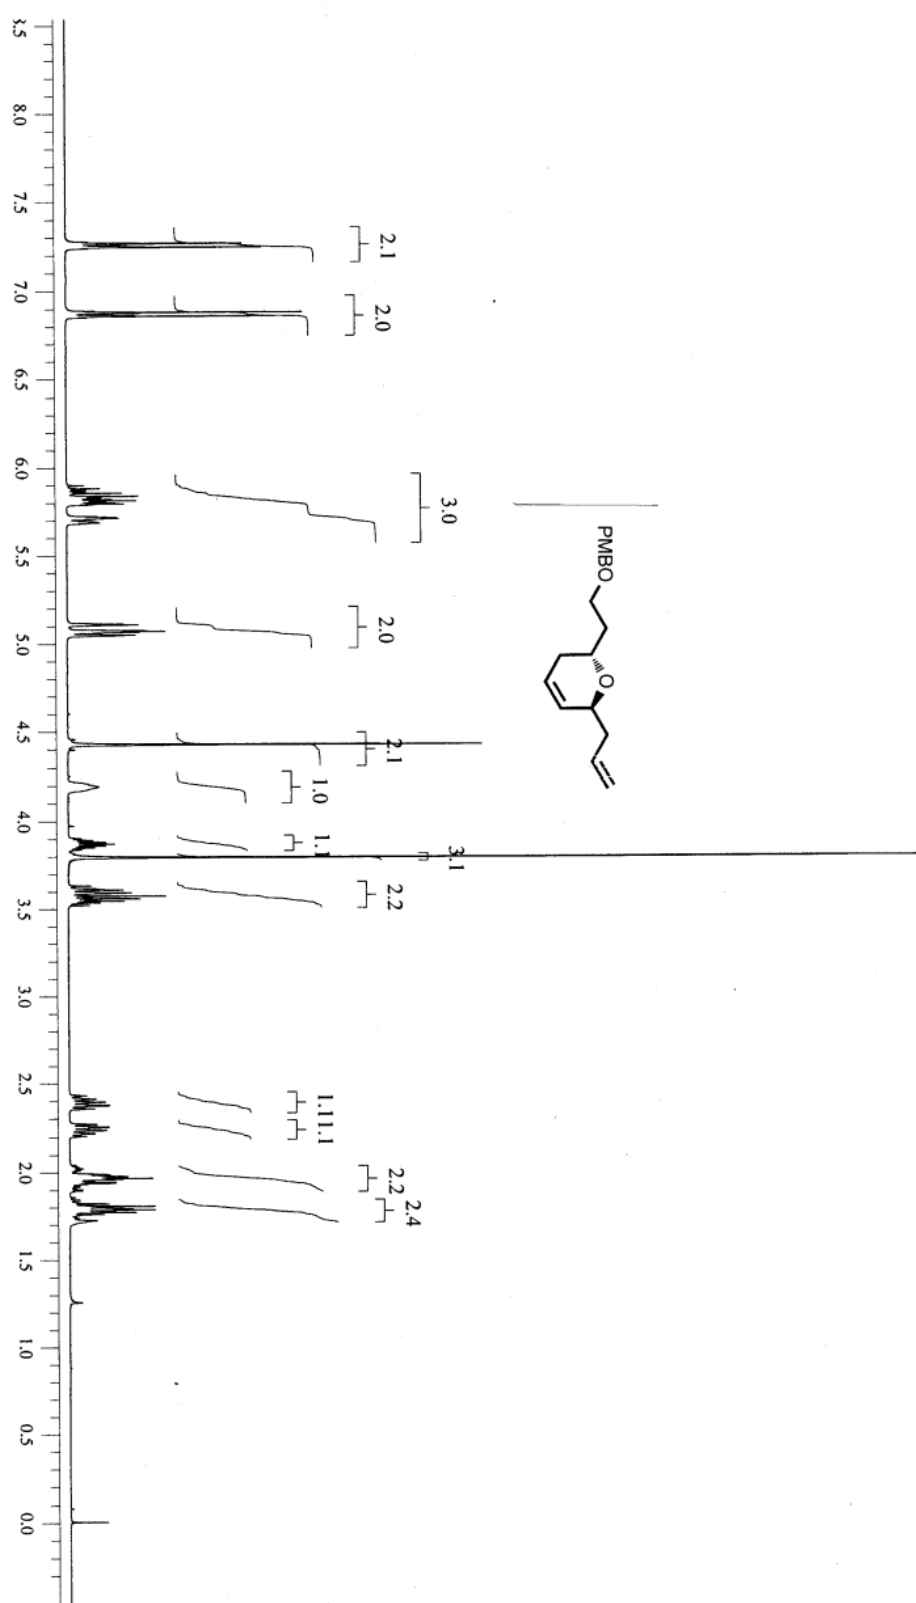

$^1\text{H}$  NMR Spectrum of Compound 11i (400 MHz,  $\text{CDCl}_3$ )

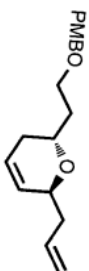

**$^{13}\text{C}$  NMR Spectrum of Compound 11i (100 MHz,  $\text{CDCl}_3$ )**

**<sup>1</sup>H NMR Spectrum of Compound 11j (400 MHz, CDCl<sub>3</sub>)**

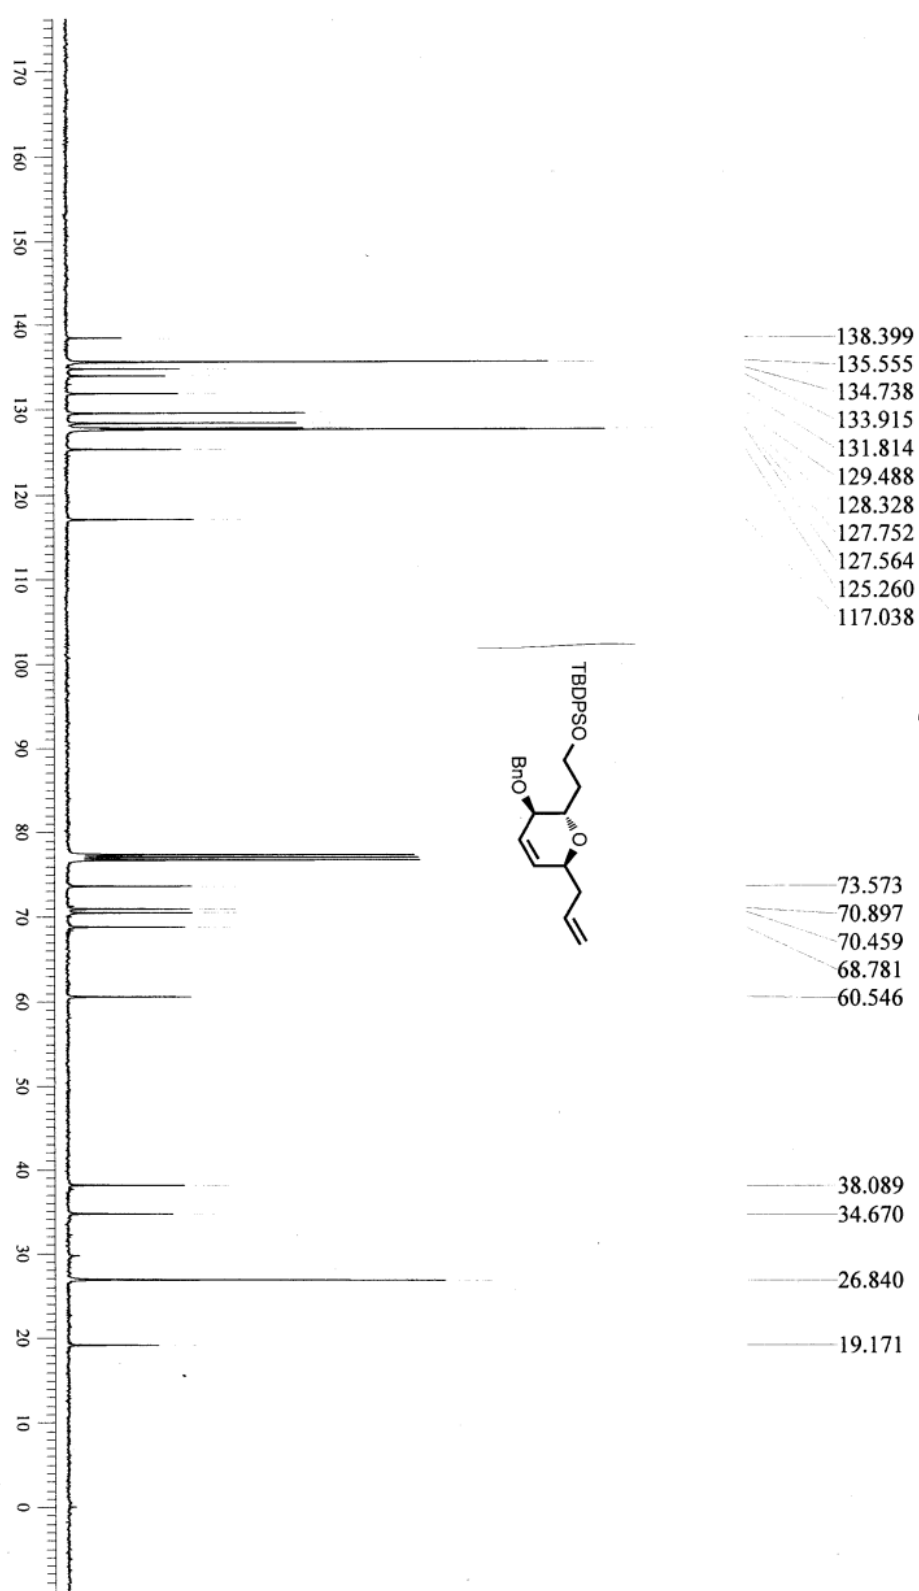

**<sup>13</sup>C NMR Spectrum of Compound 11j (100 MHz, CDCl<sub>3</sub>)**

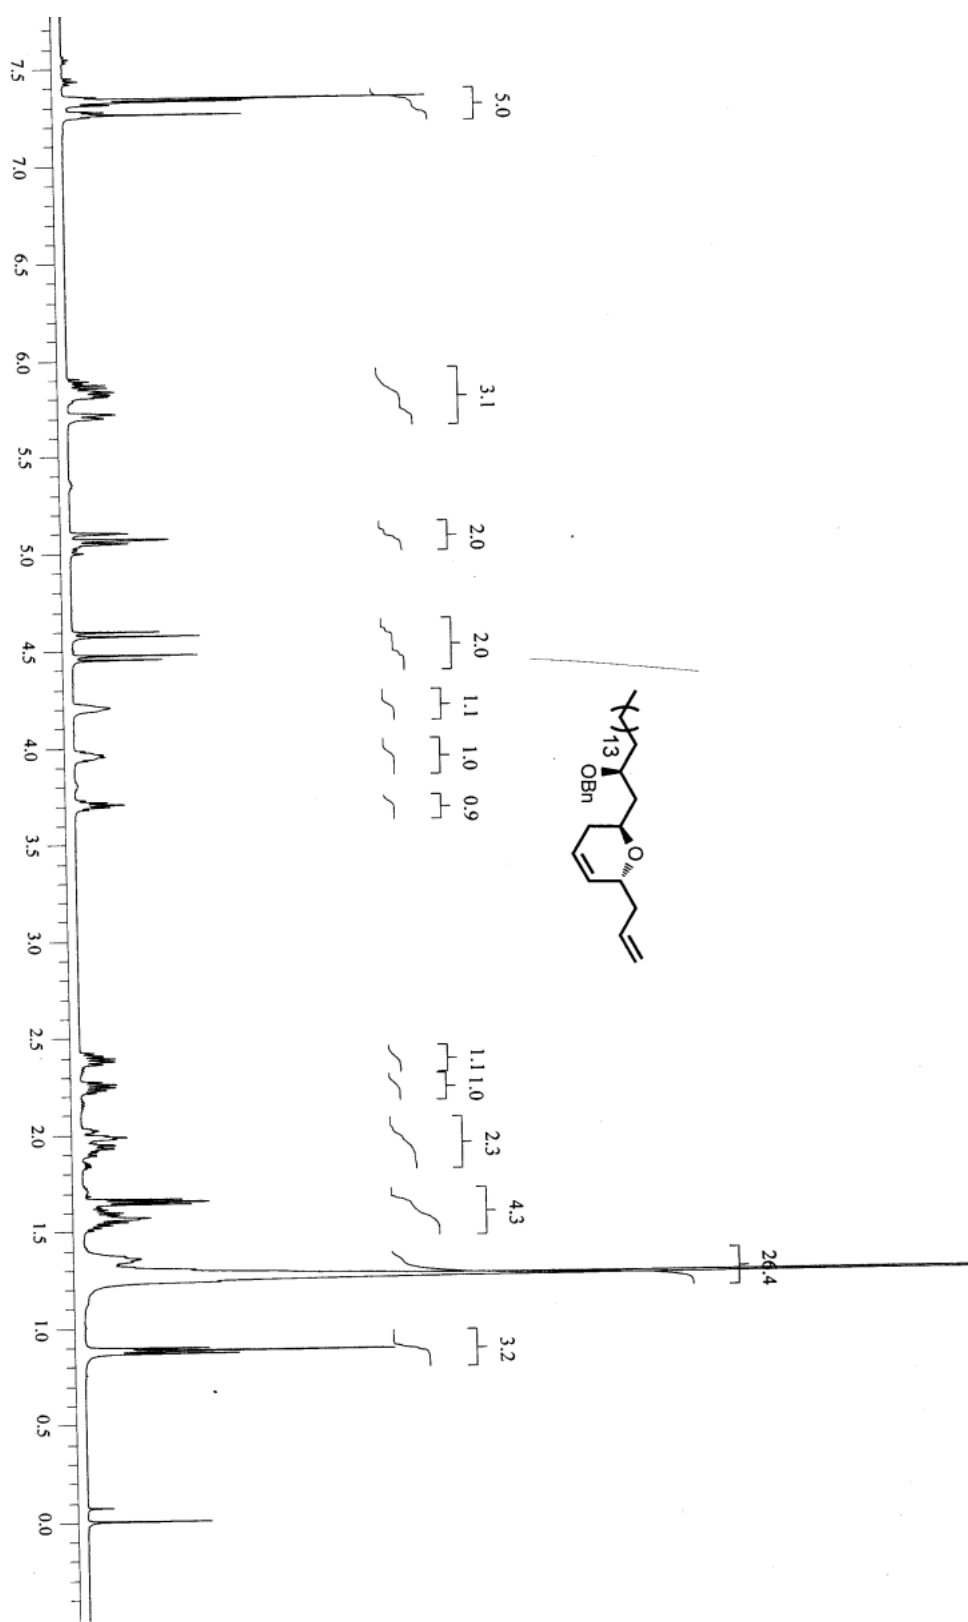

$^1\text{H}$  NMR Spectrum of Compound 11k (500 MHz,  $\text{CDCl}_3$ )

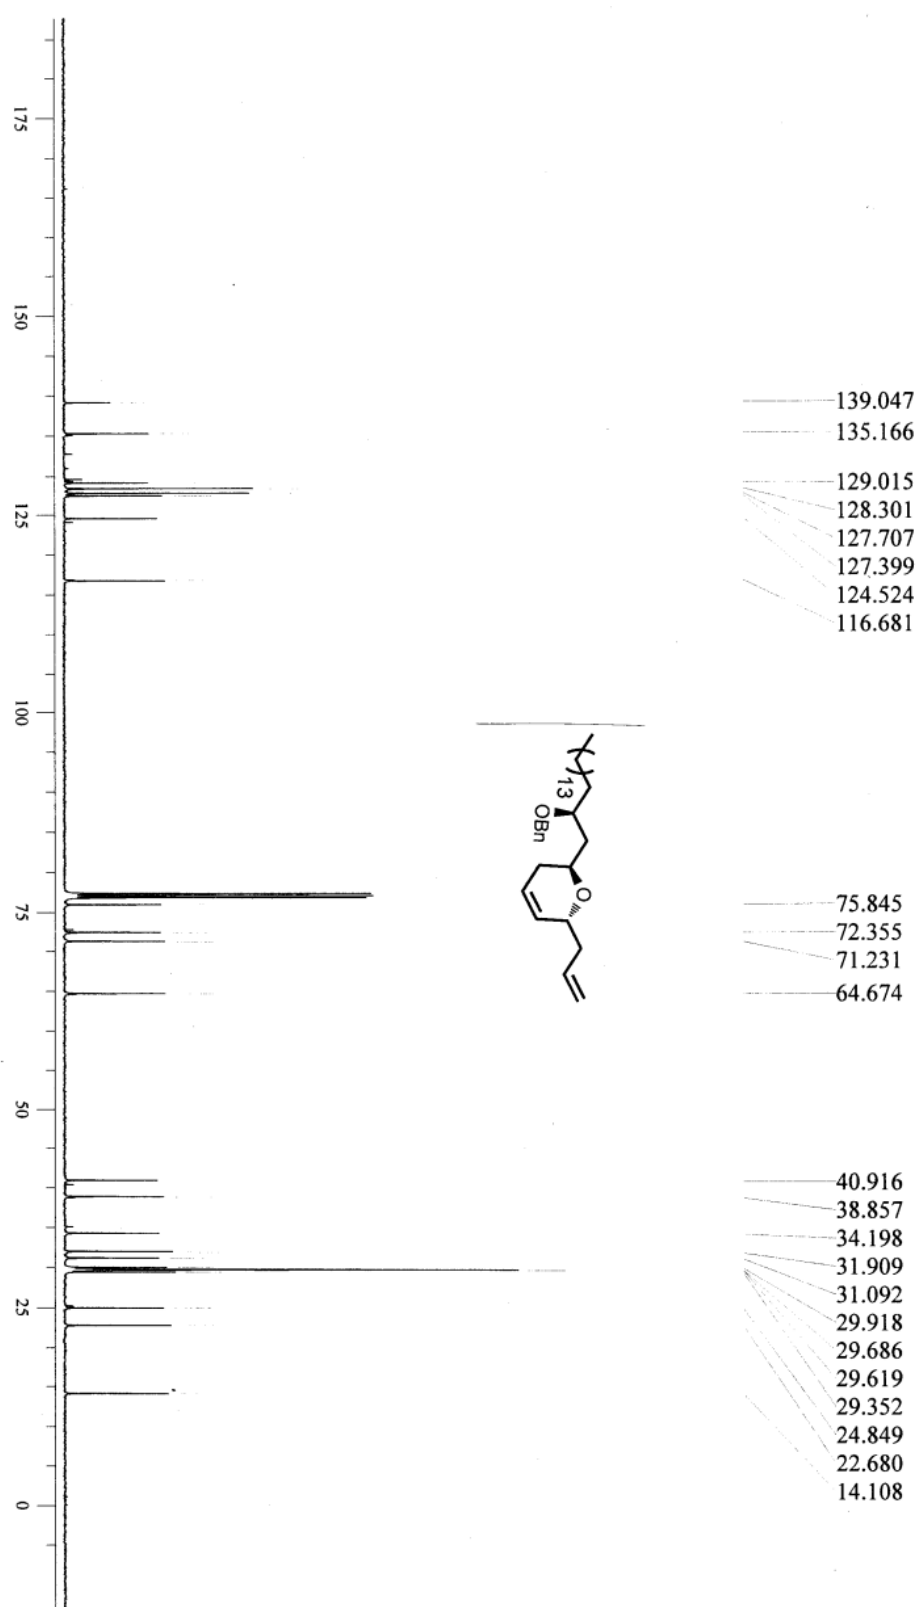

$^{13}\text{C}$  NMR Spectrum of Compound 11k (125 MHz,  $\text{CDCl}_3$ )

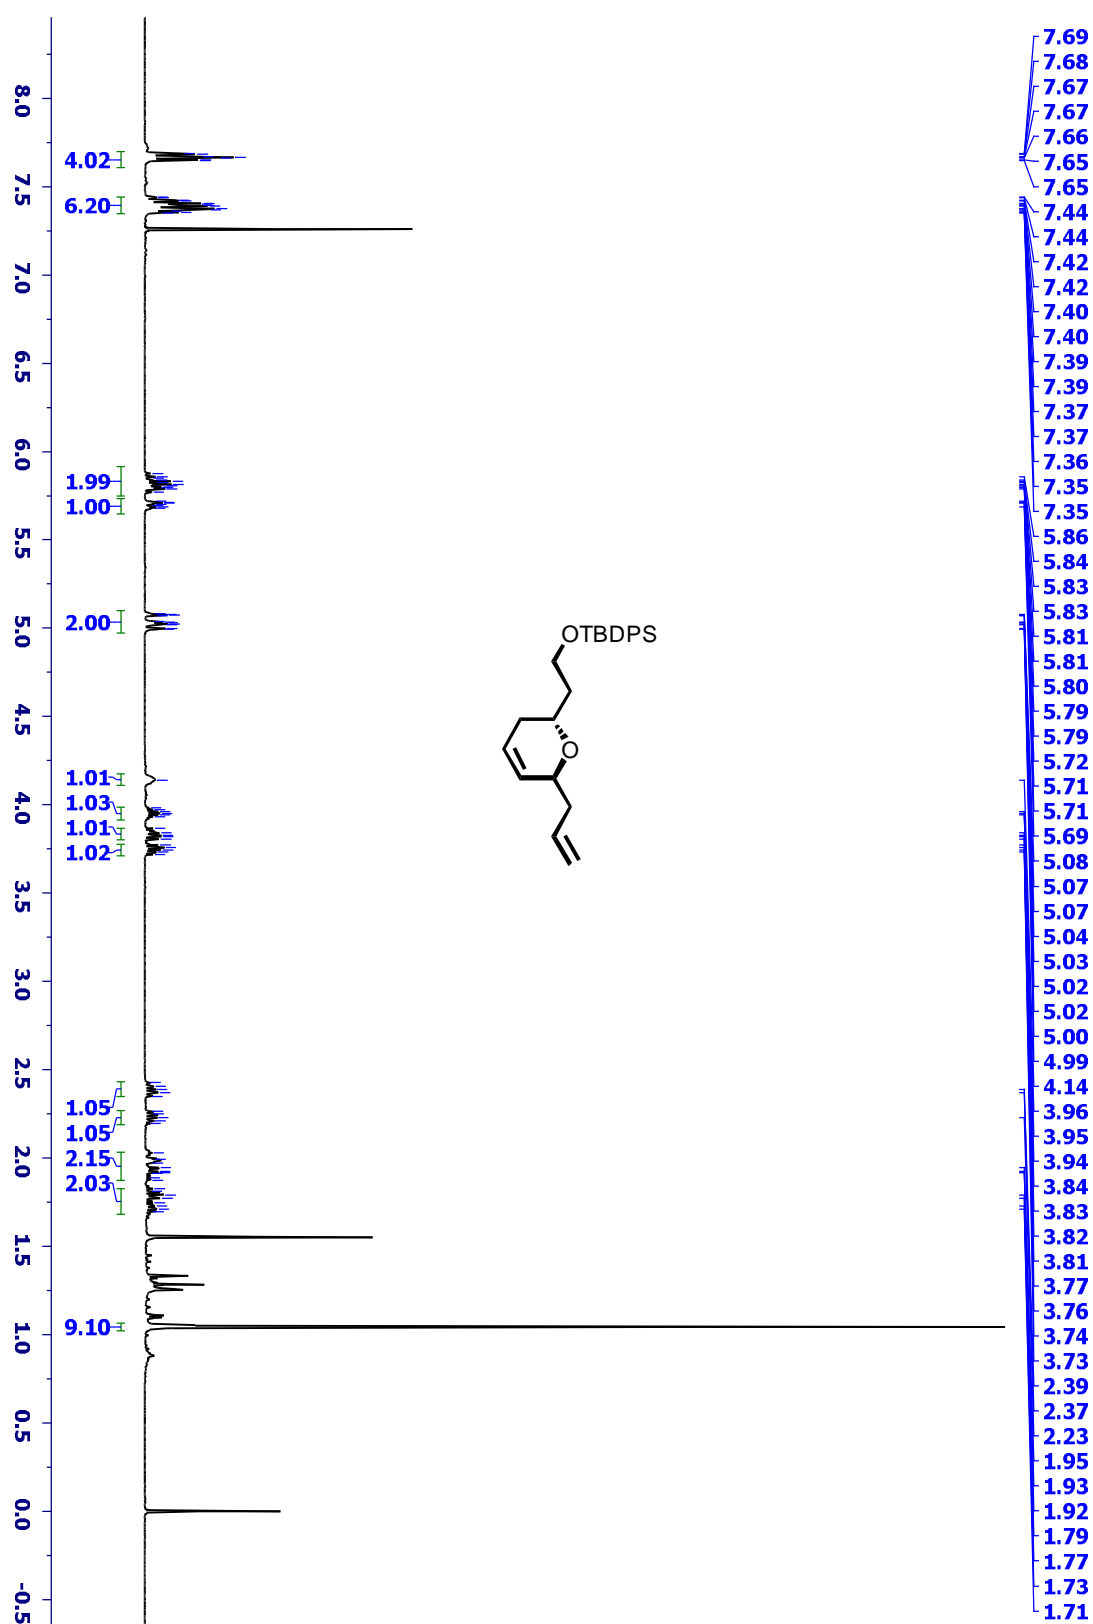

$^1\text{H}$  NMR Spectrum of Compound 11l (400 MHz,  $\text{CDCl}_3$ )



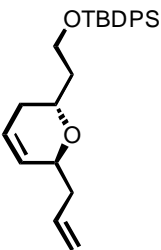

**$^{13}\text{C}$  NMR Spectrum of Compound 11l (100 MHz,  $\text{CDCl}_3$ )**

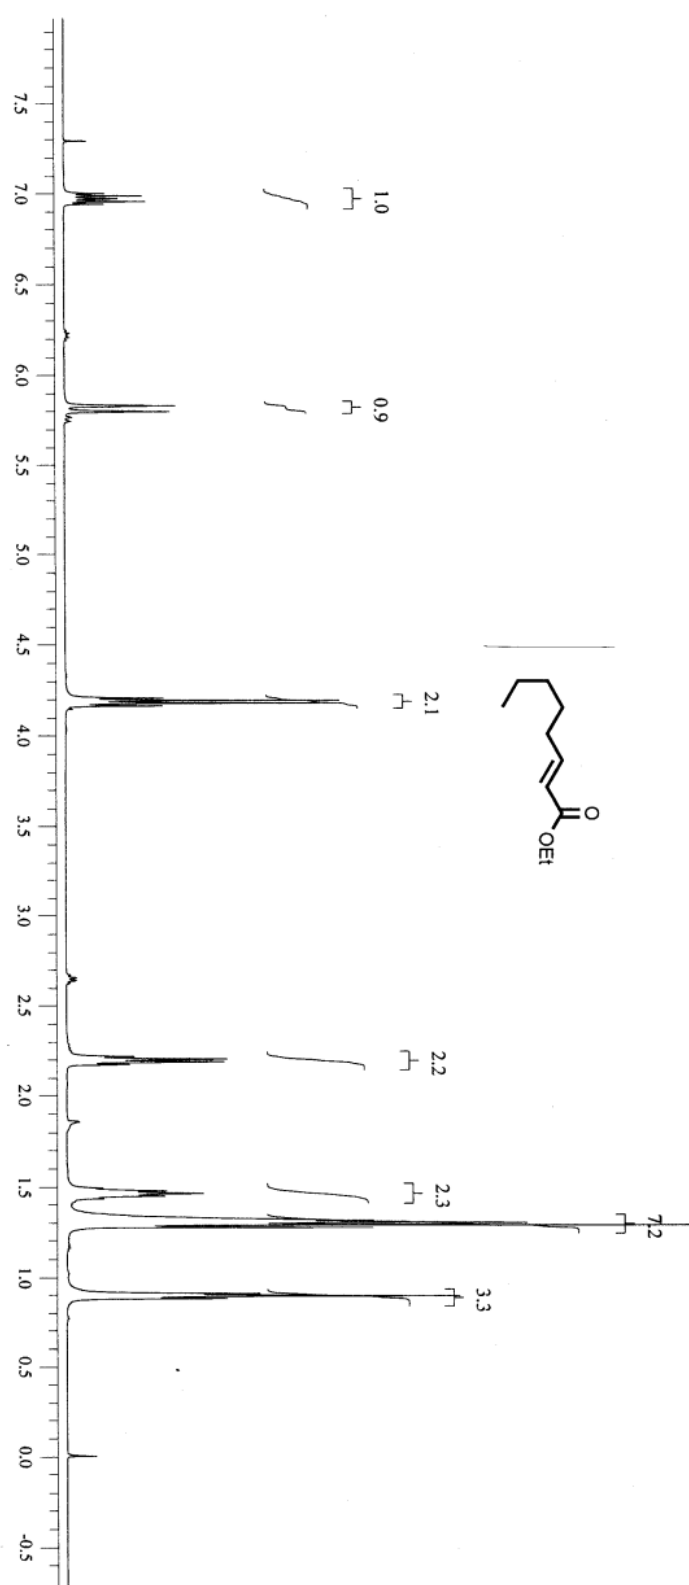

$^1\text{H}$  NMR Spectrum of Compound 20 (500 MHz,  $\text{CDCl}_3$ )

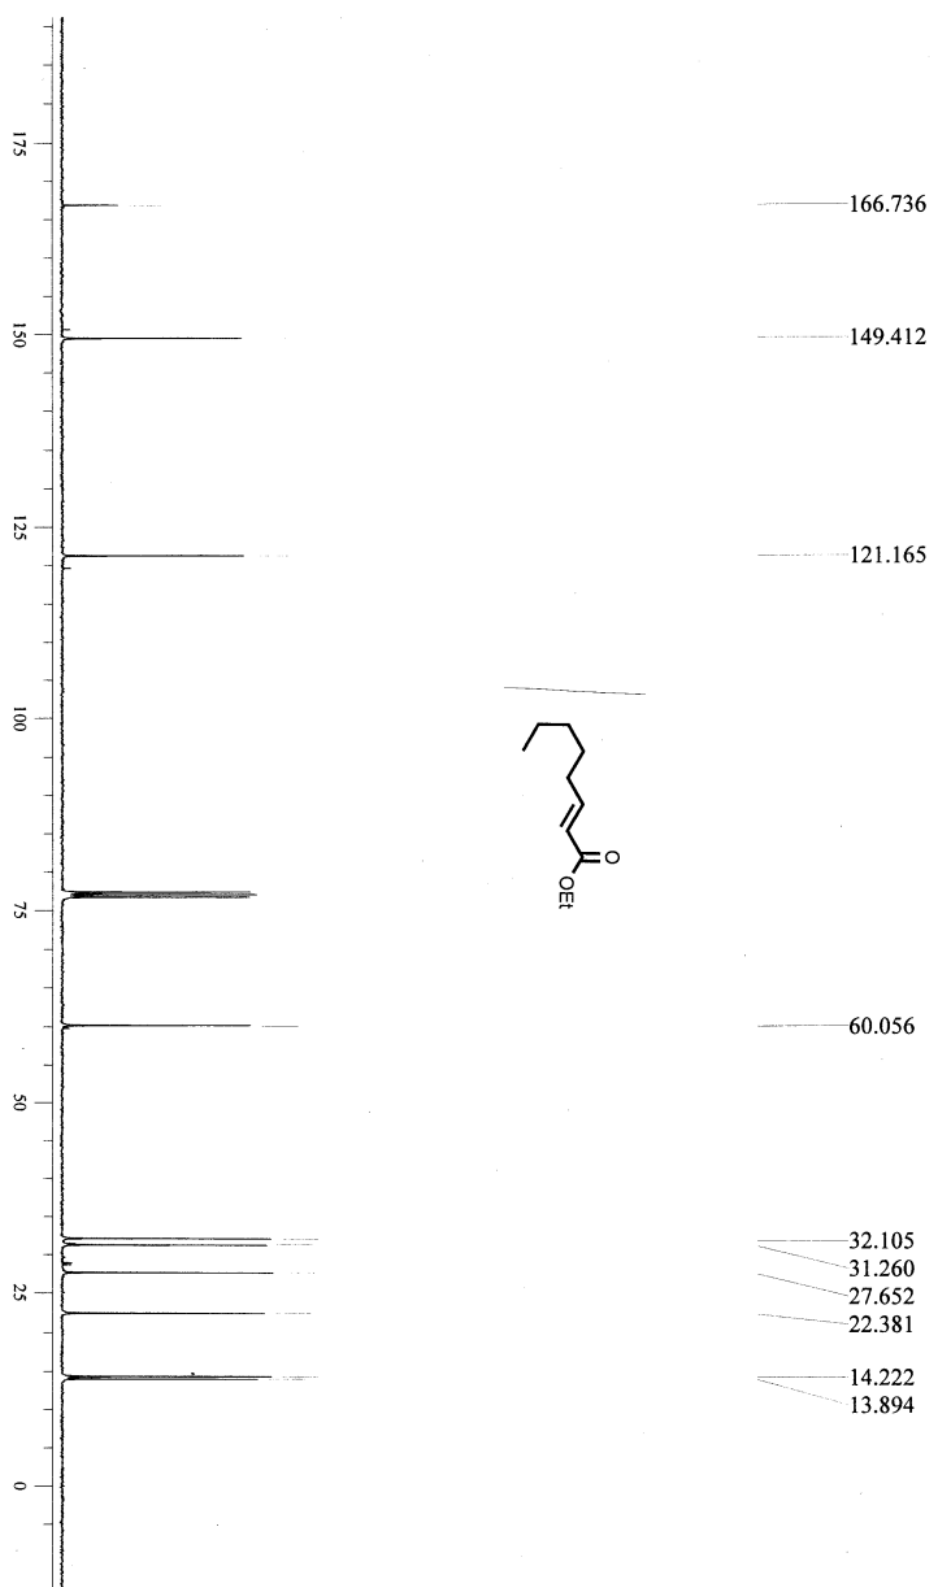

$^{13}\text{C}$  NMR Spectrum of Compound 20 (100 MHz,  $\text{CDCl}_3$ )

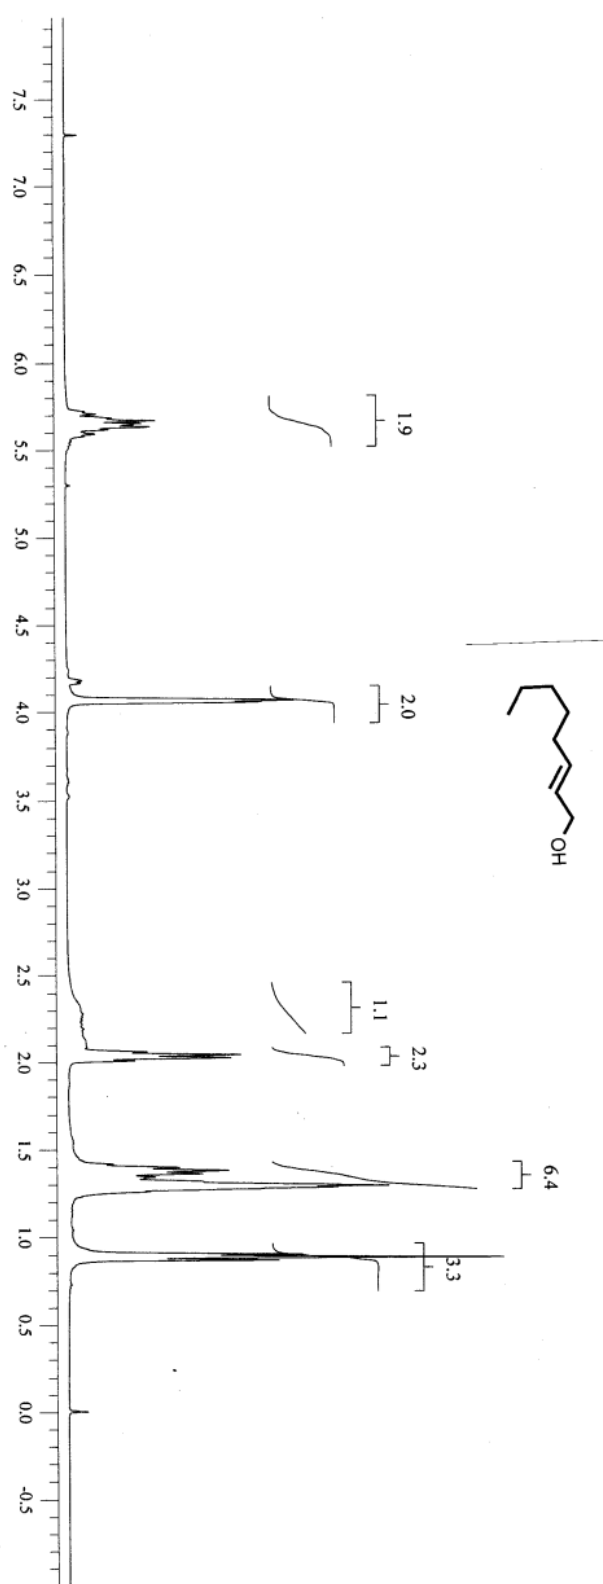

$^1\text{H}$  NMR Spectrum of Compound 21 (400 MHz,  $\text{CDCl}_3$ )

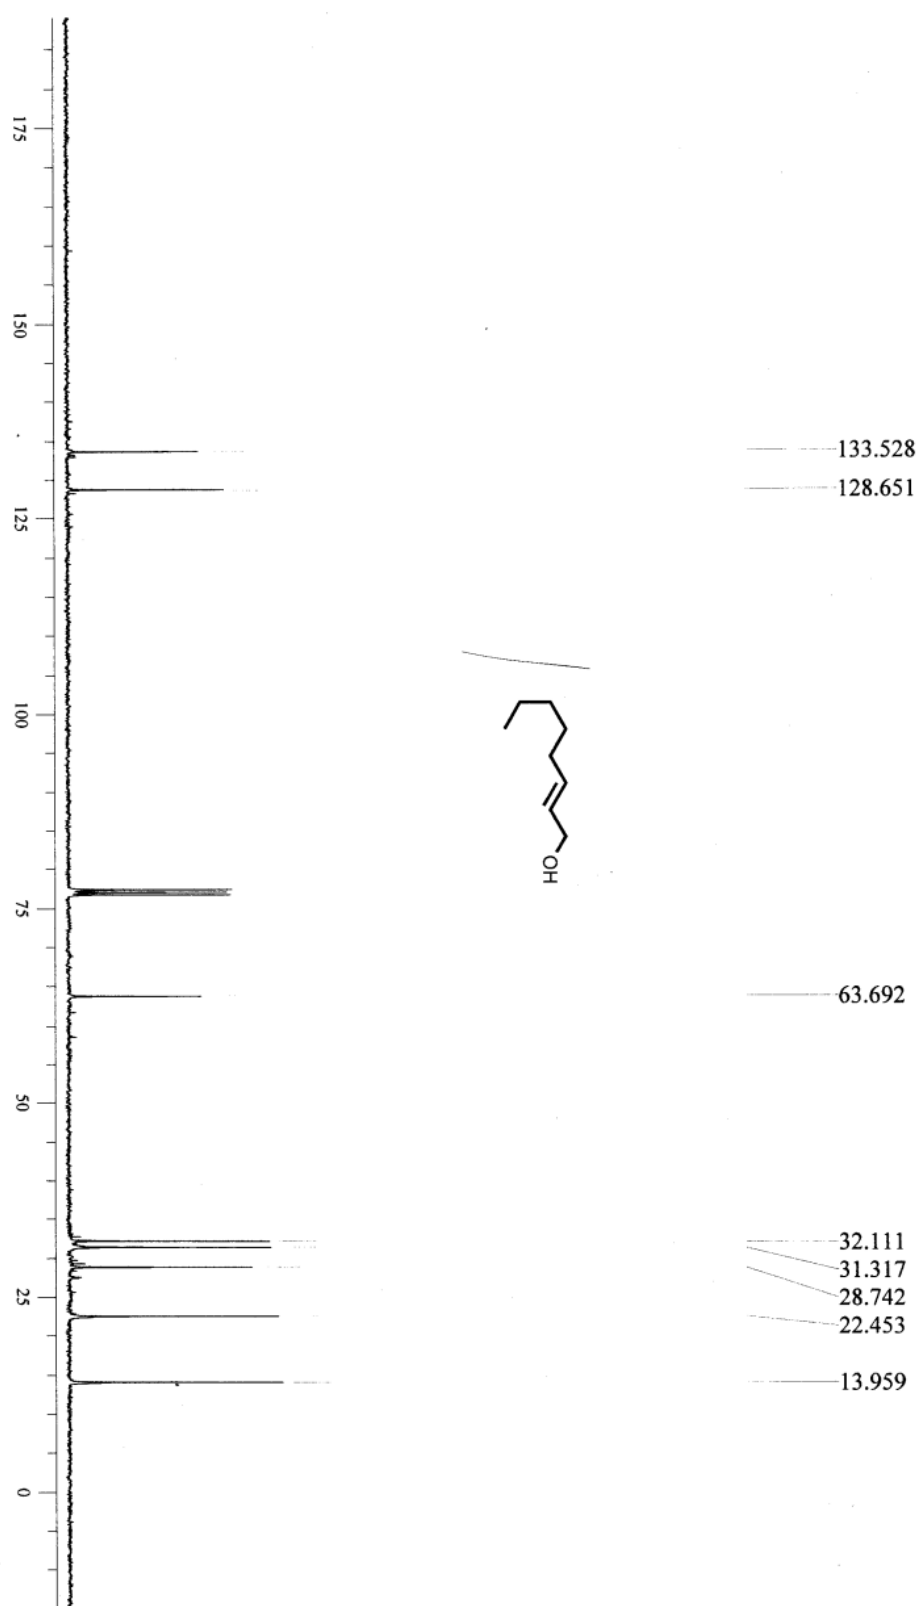

$^{13}\text{C}$  NMR Spectrum of Compound 21 (100 MHz,  $\text{CDCl}_3$ )

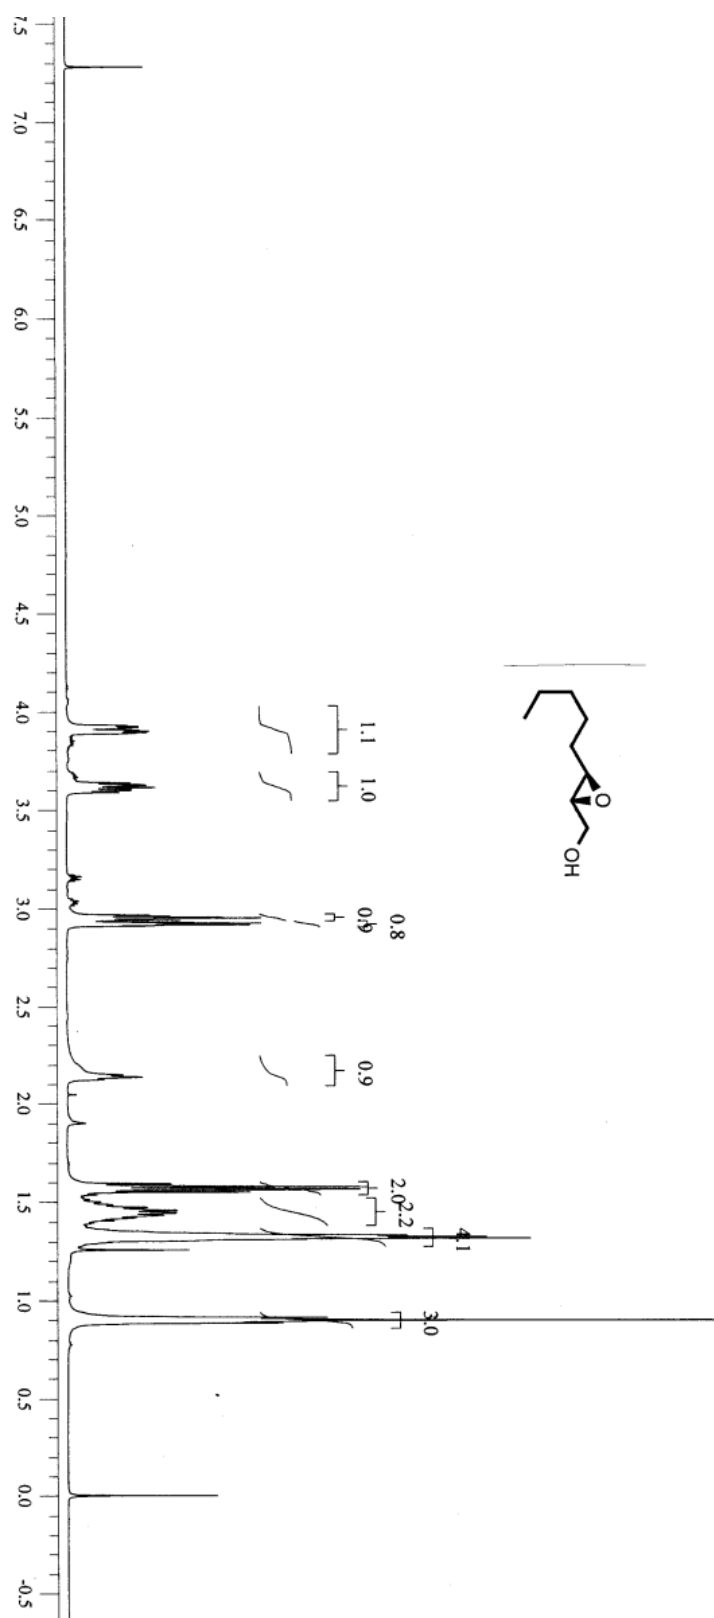

$^1\text{H}$  NMR Spectrum of Compound 22 (500 MHz,  $\text{CDCl}_3$ )

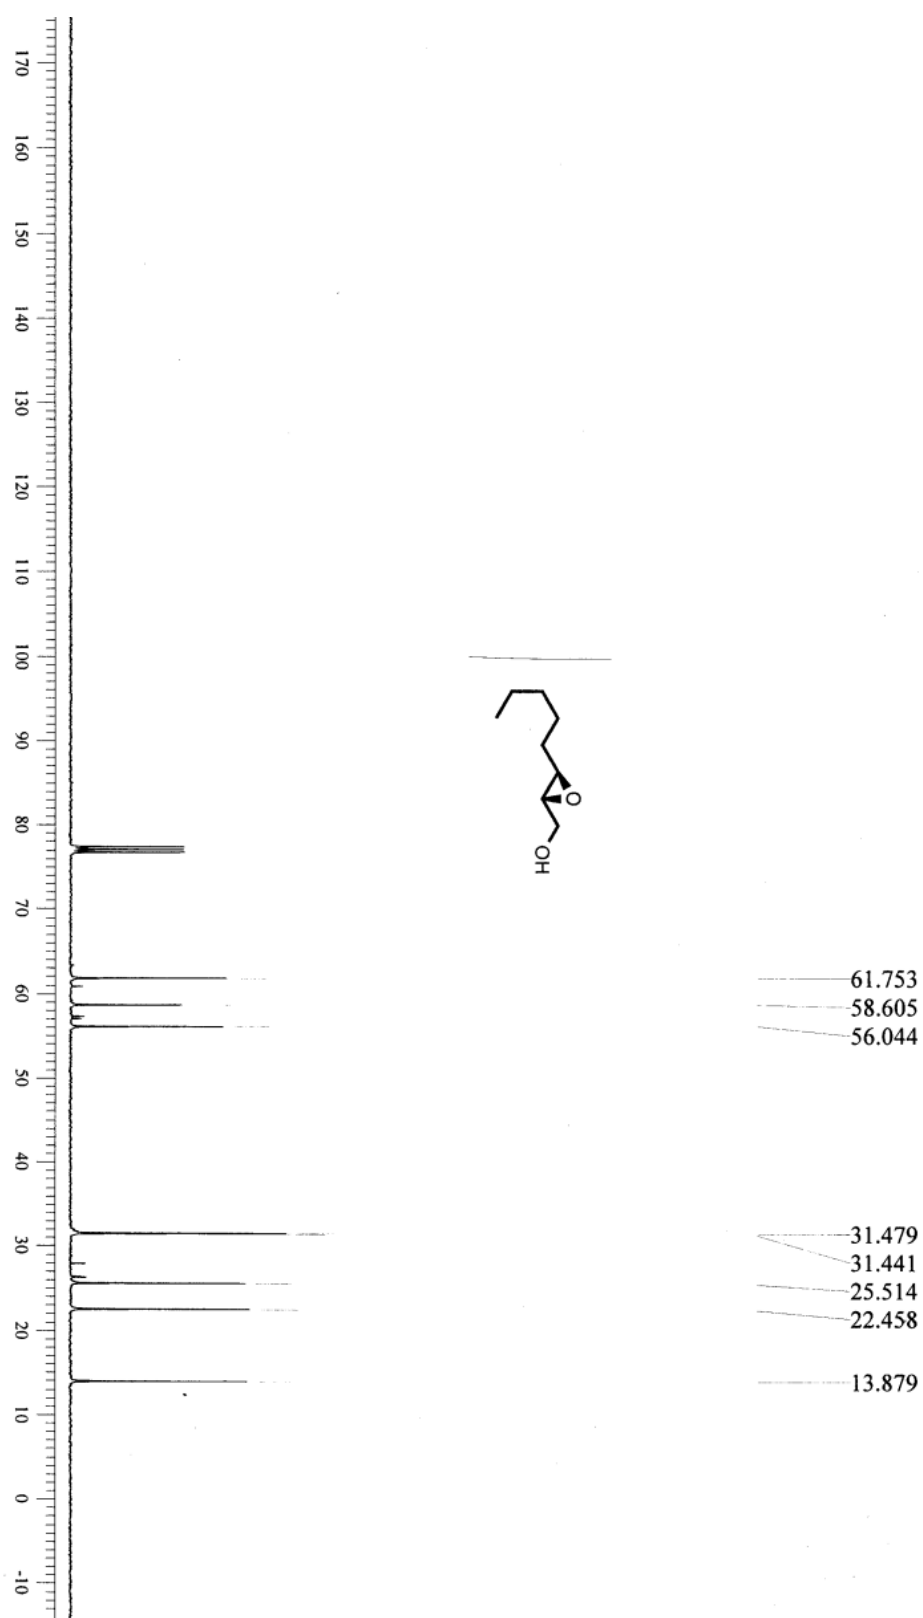

$^{13}\text{C}$  NMR Spectrum of Compound 22 (125 MHz,  $\text{CDCl}_3$ )

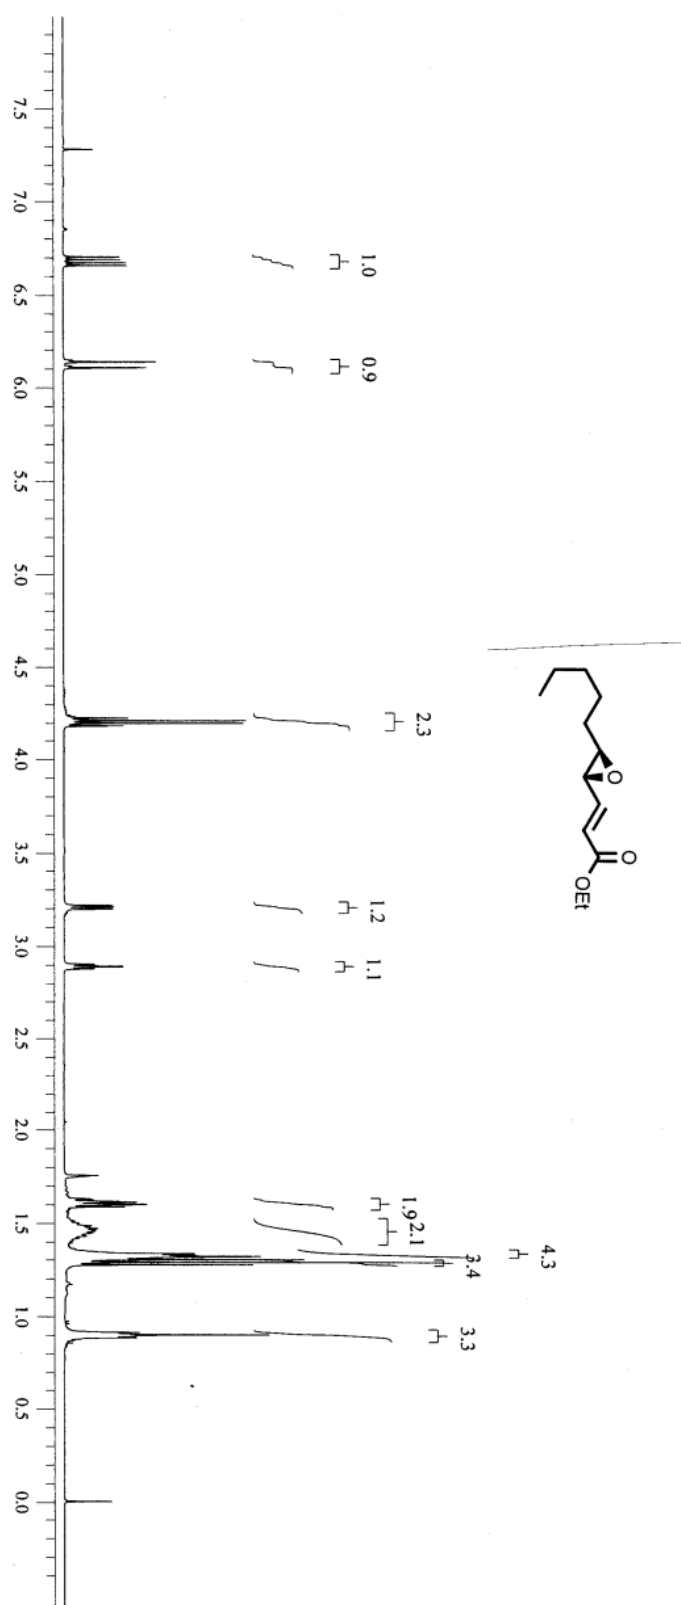

$^1\text{H}$  NMR Spectrum of Compound 23 (500 MHz,  $\text{CDCl}_3$ )



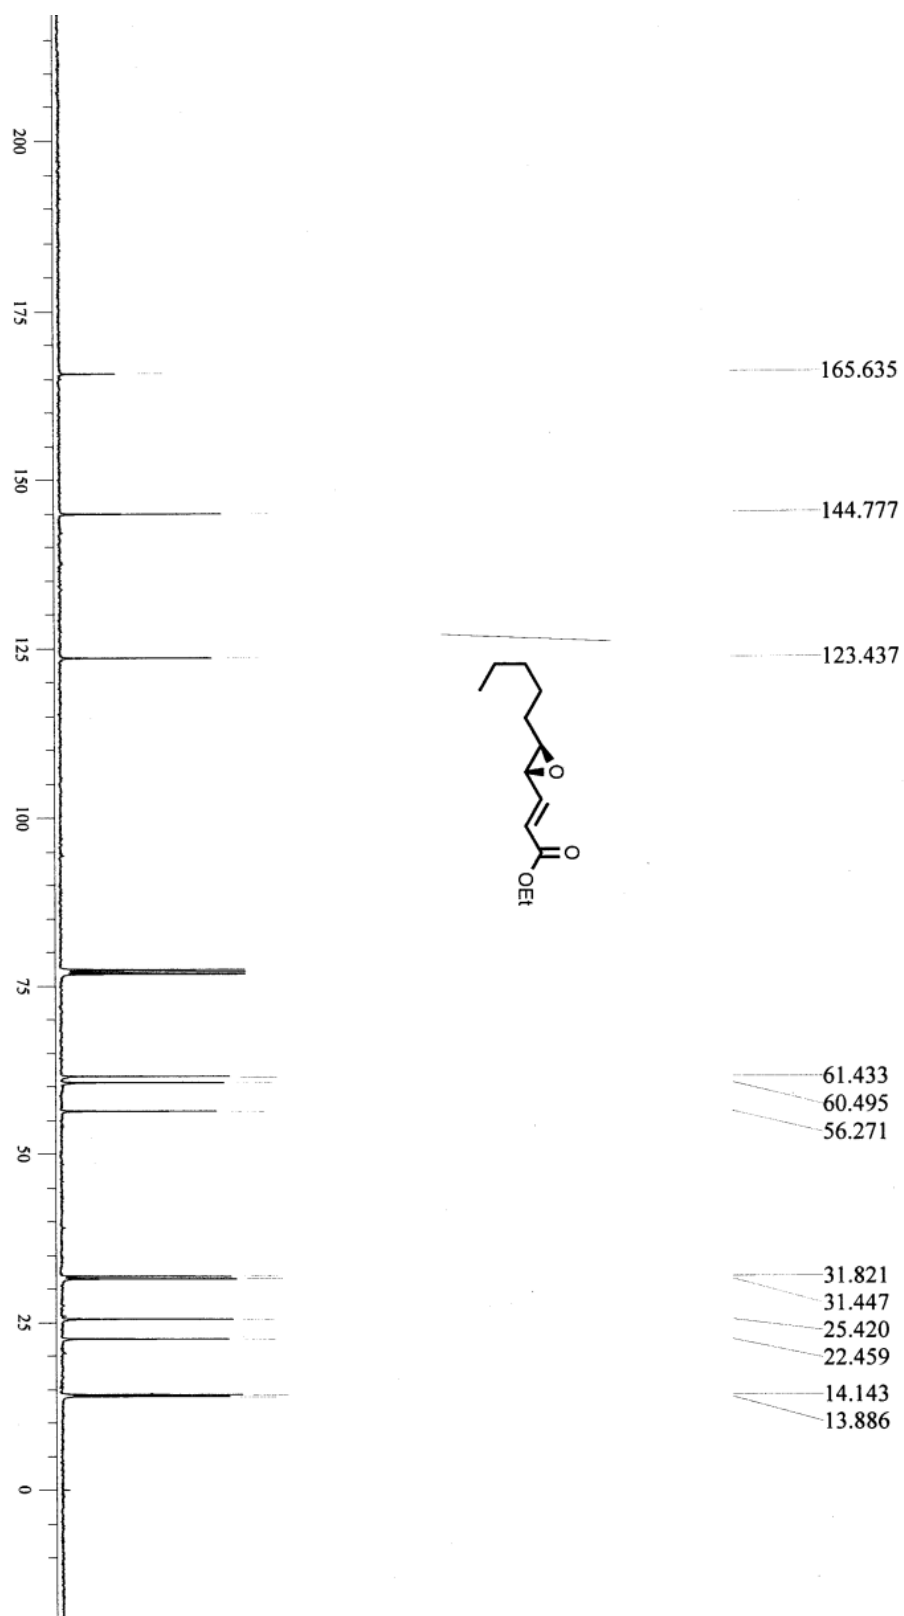

$^{13}\text{C}$  NMR Spectrum of Compound 23 (100 MHz,  $\text{CDCl}_3$ )

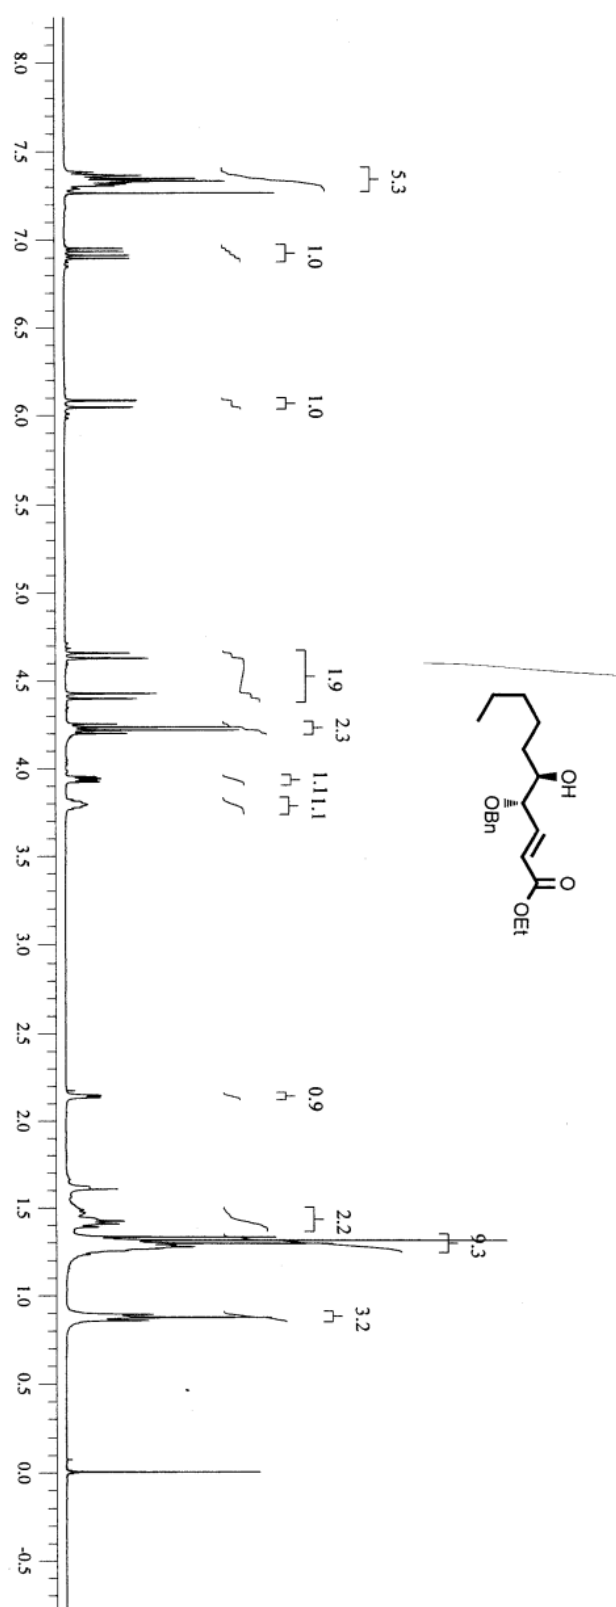

$^1\text{H}$  NMR Spectrum of Compound 18 (400 MHz,  $\text{CDCl}_3$ )

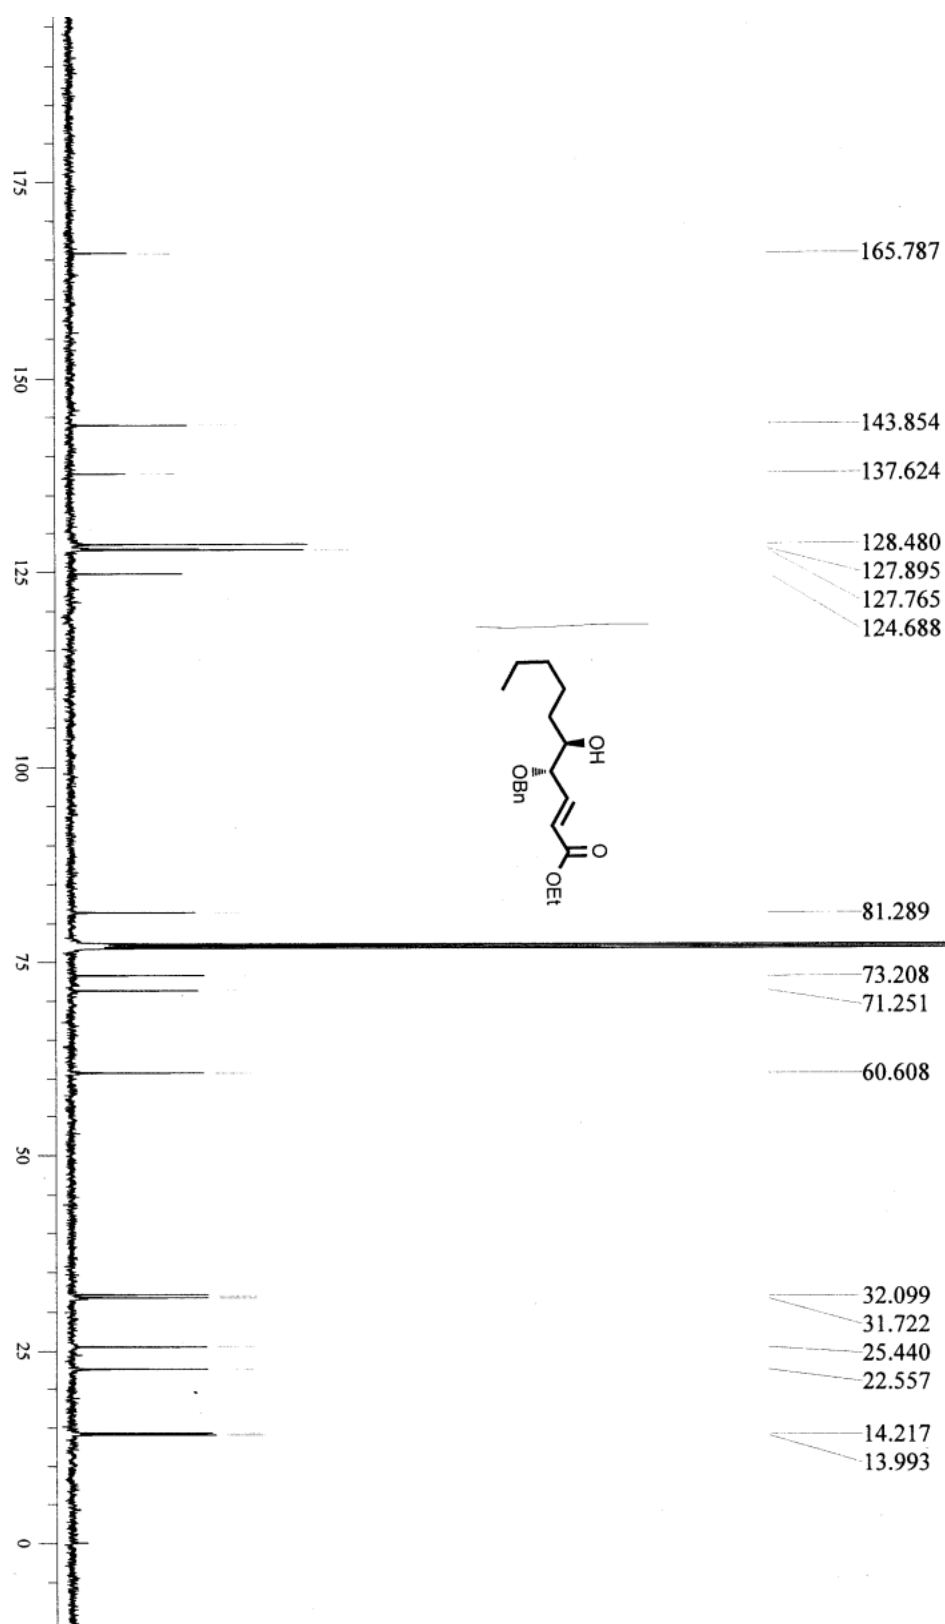

$^{13}\text{C}$  NMR Spectrum of Compound 18 (125 MHz,  $\text{CDCl}_3$ )

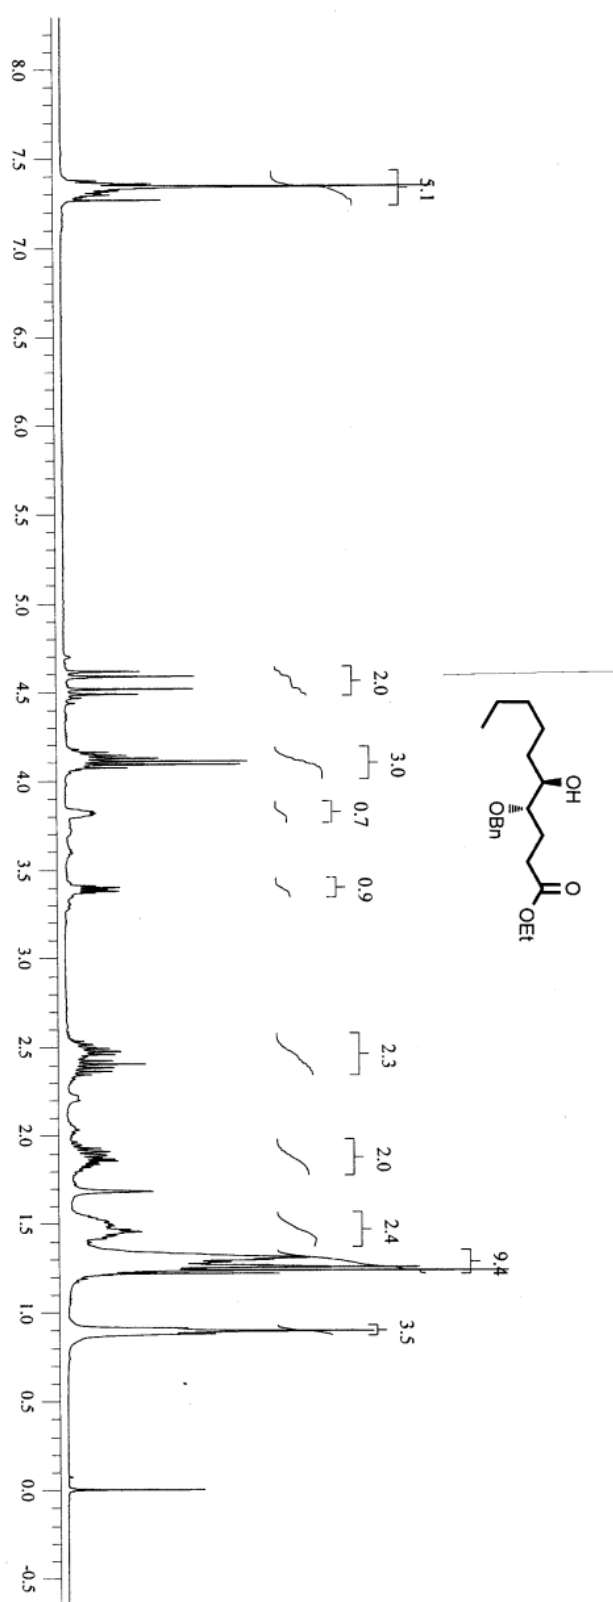

$^1\text{H}$  NMR Spectrum of Compound 24 (400 MHz,  $\text{CDCl}_3$ )

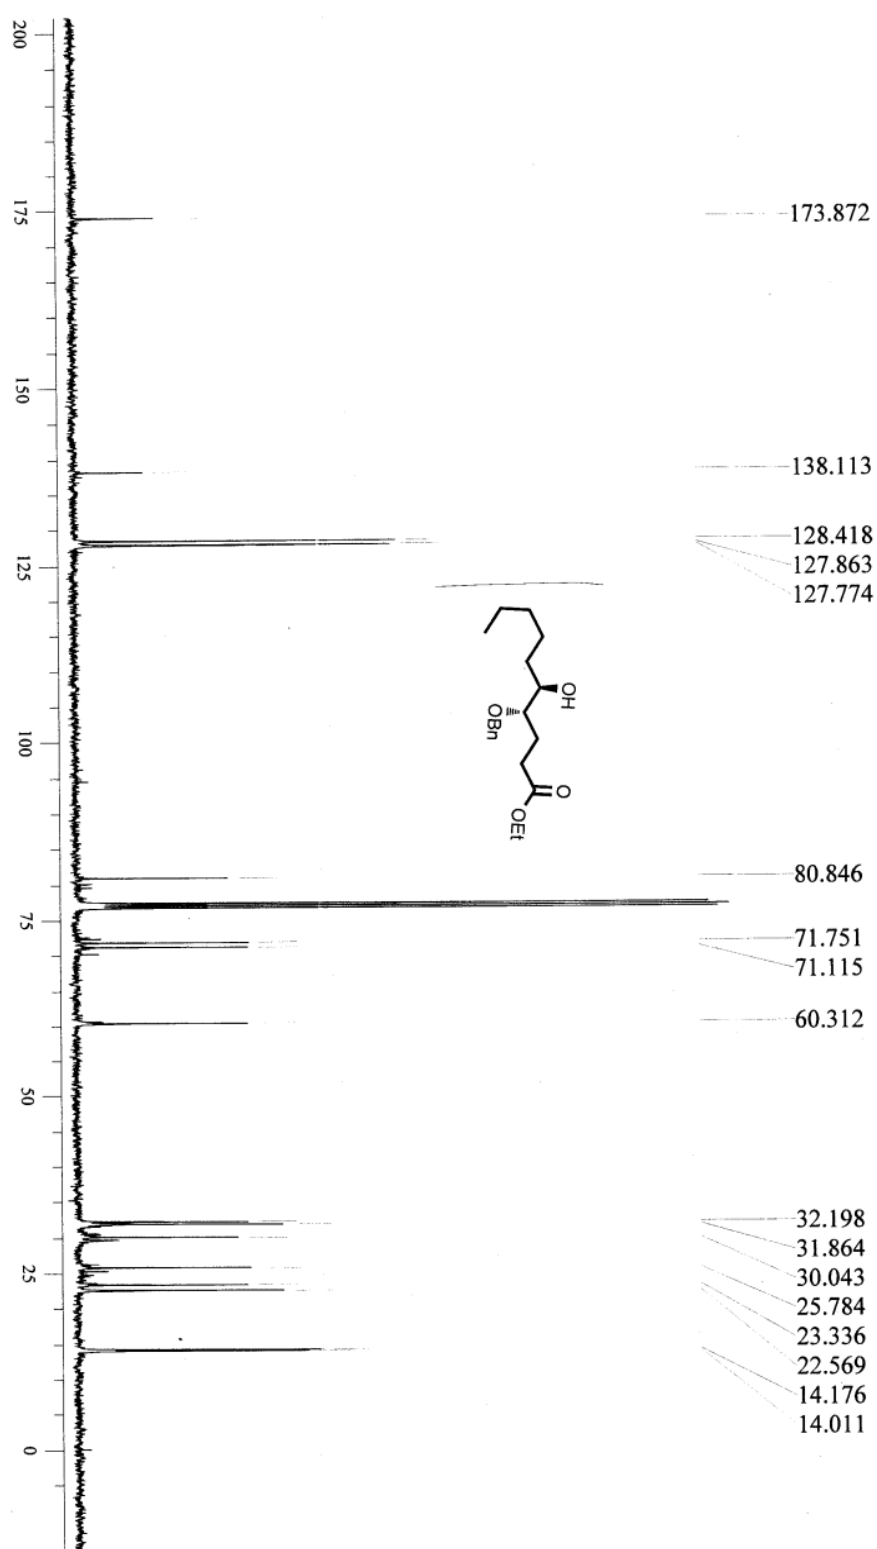

$^{13}\text{C}$  NMR Spectrum of Compound 24 (100 MHz,  $\text{CDCl}_3$ )

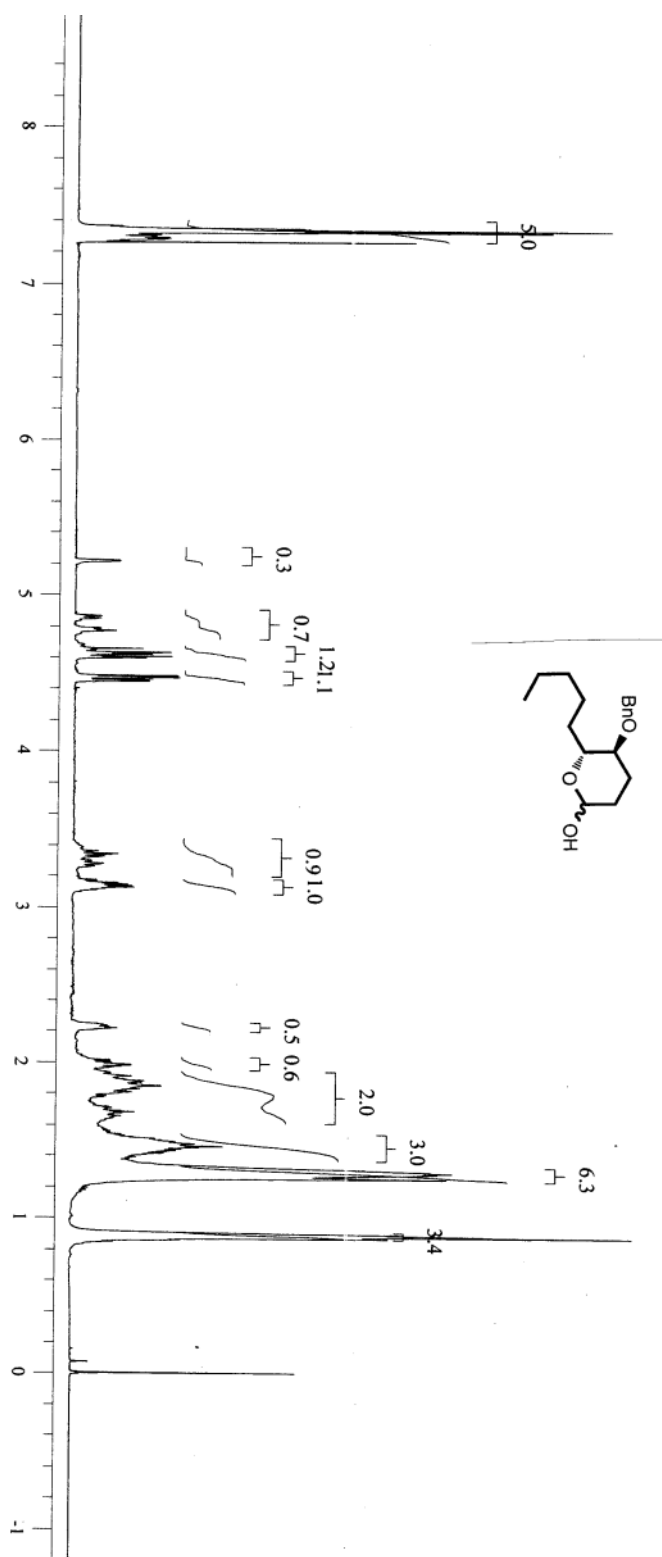

$^1\text{H}$  NMR Spectrum of Compound 10m (500 MHz,  $\text{CDCl}_3$ )

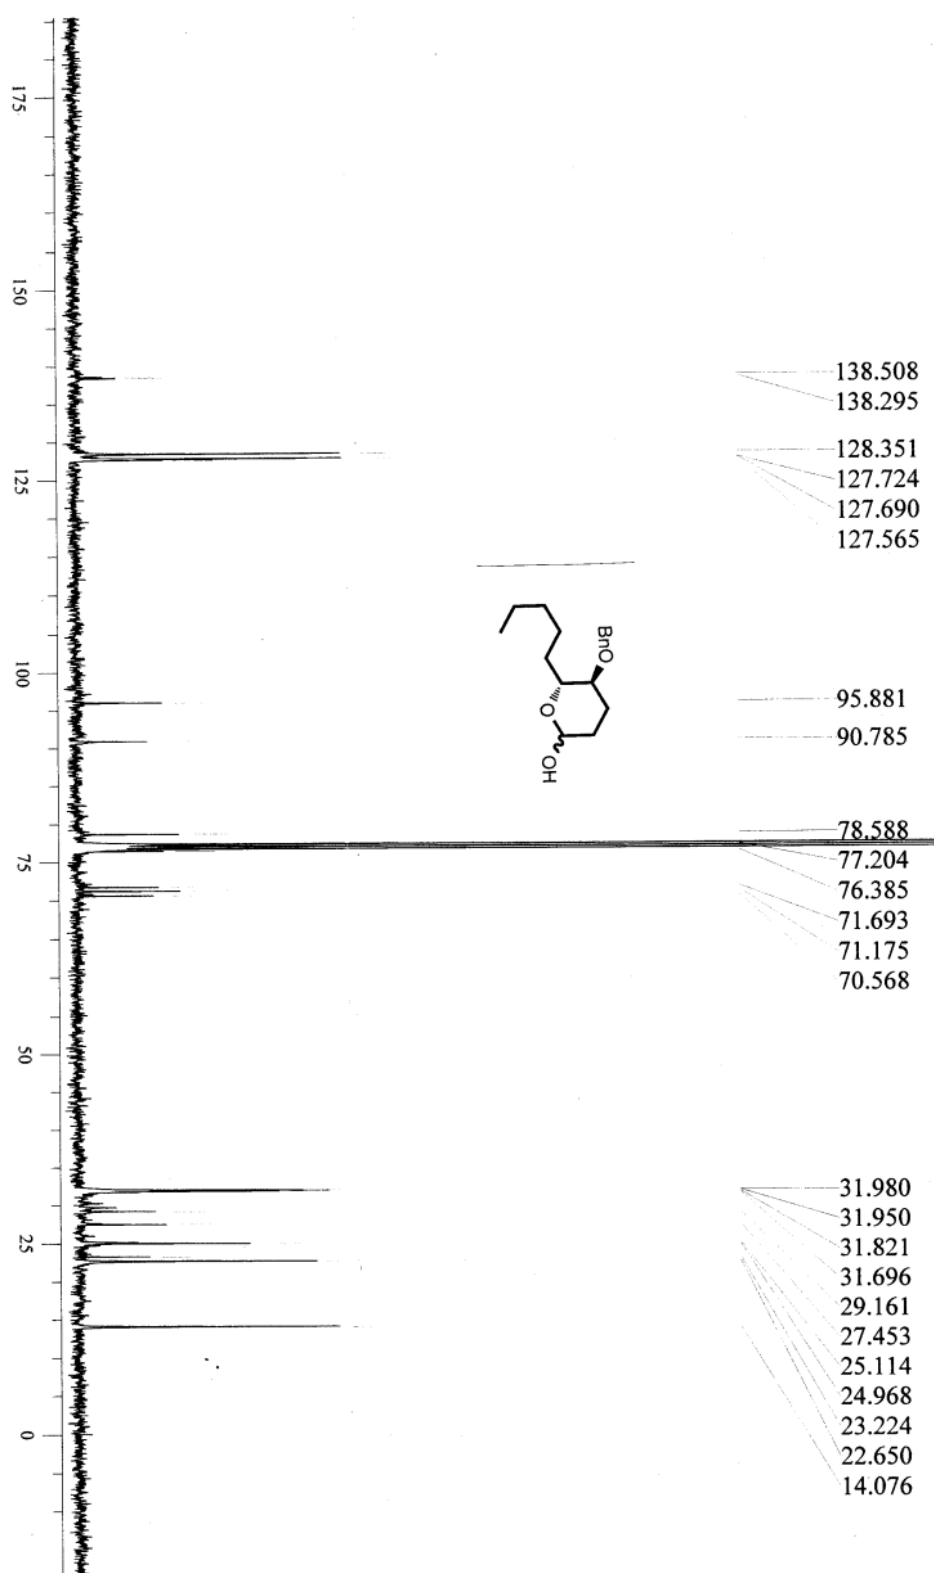

**<sup>13</sup>C NMR Spectrum of Compound 10m (100 MHz, CDCl<sub>3</sub>)**

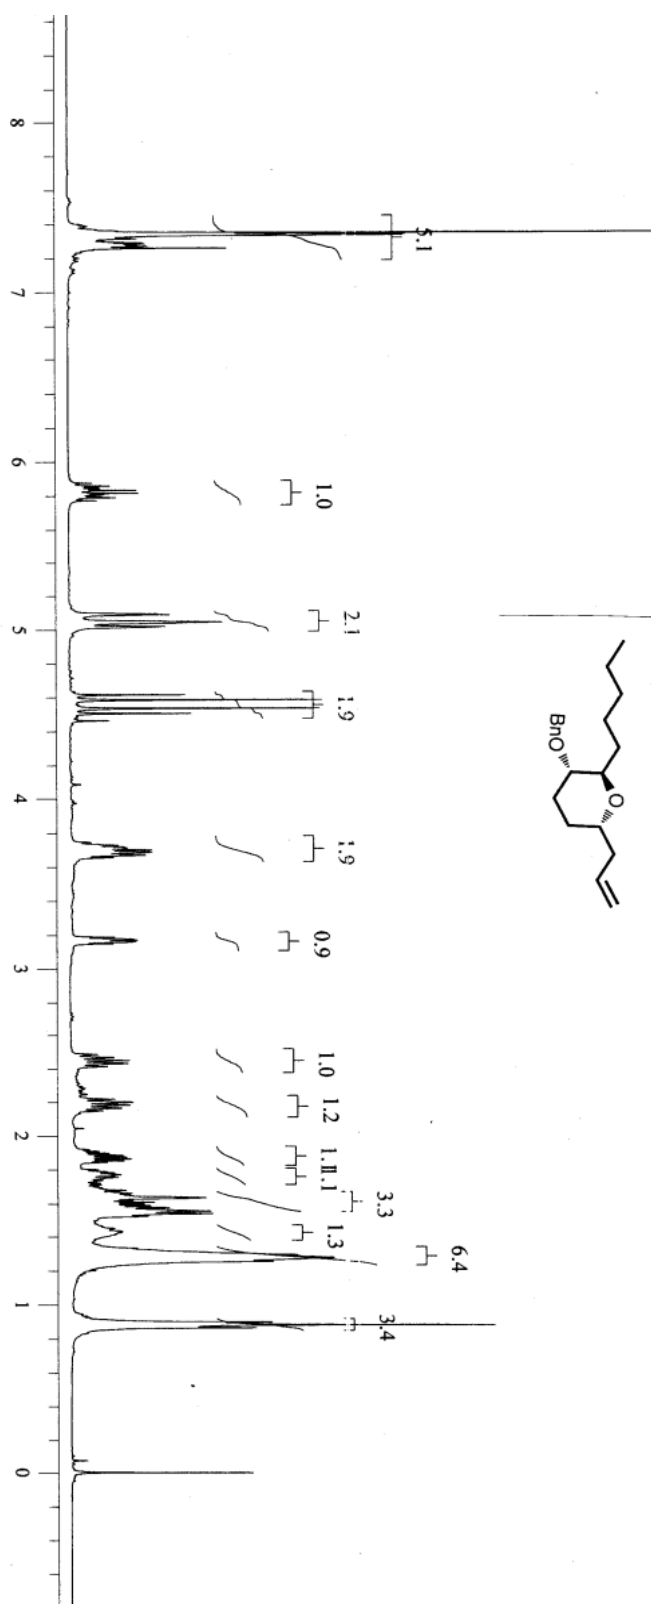

$^1\text{H}$  NMR Spectrum of Compound 11m (400 MHz,  $\text{CDCl}_3$ )



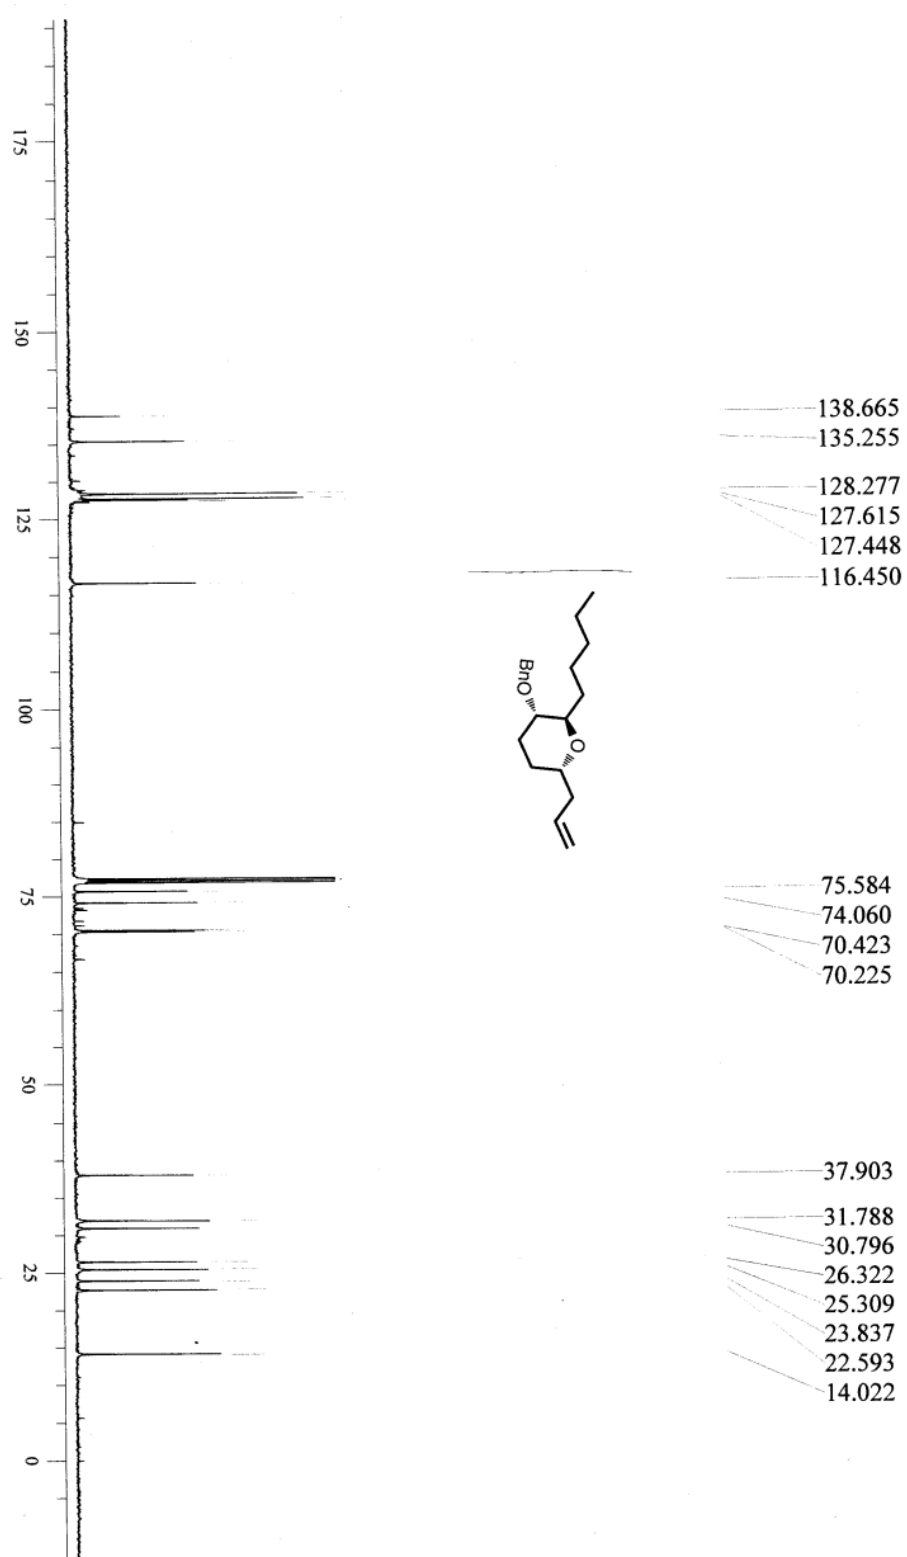

$^{13}\text{C}$  NMR Spectrum of Compound 11m (125 MHz,  $\text{CDCl}_3$ )

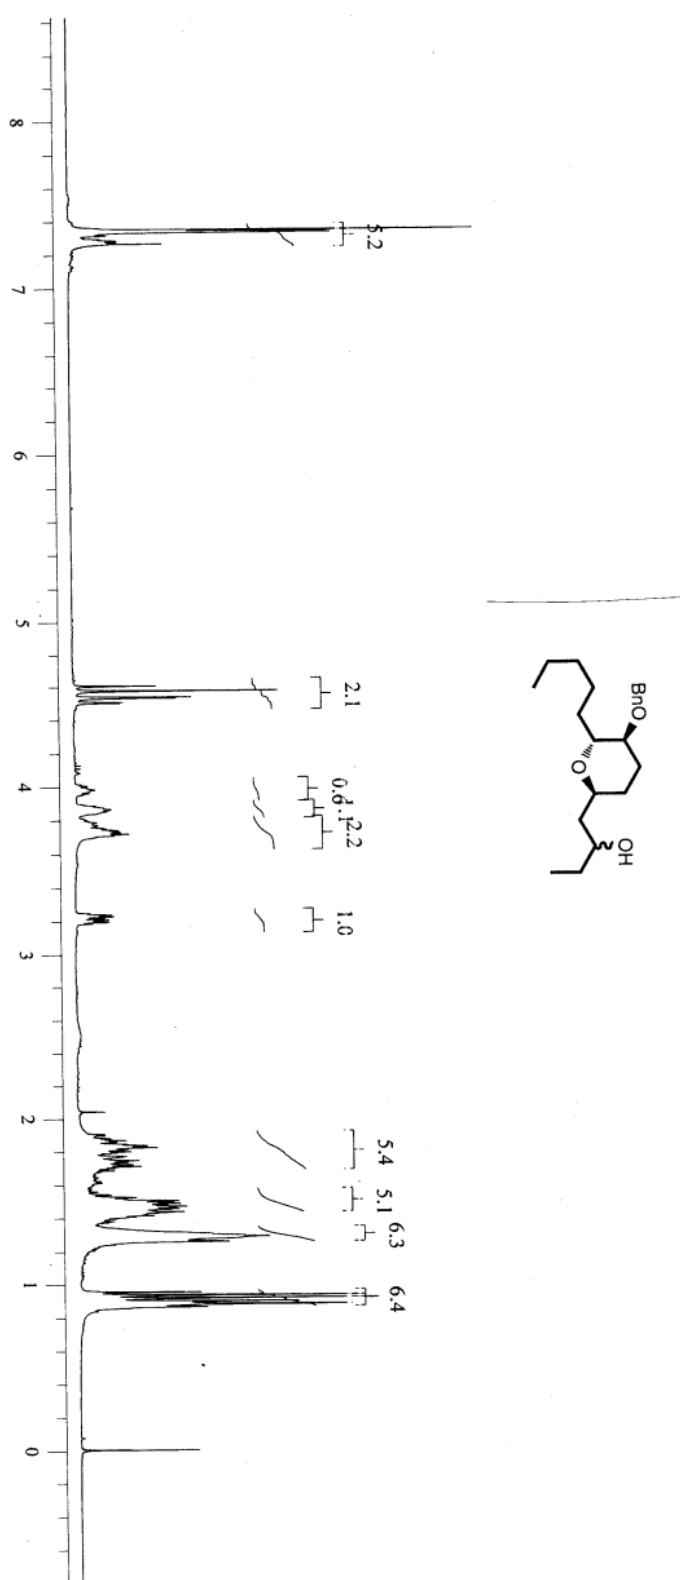

$^1\text{H}$  NMR Spectrum of Compound 25 (400 MHz,  $\text{CDCl}_3$ )

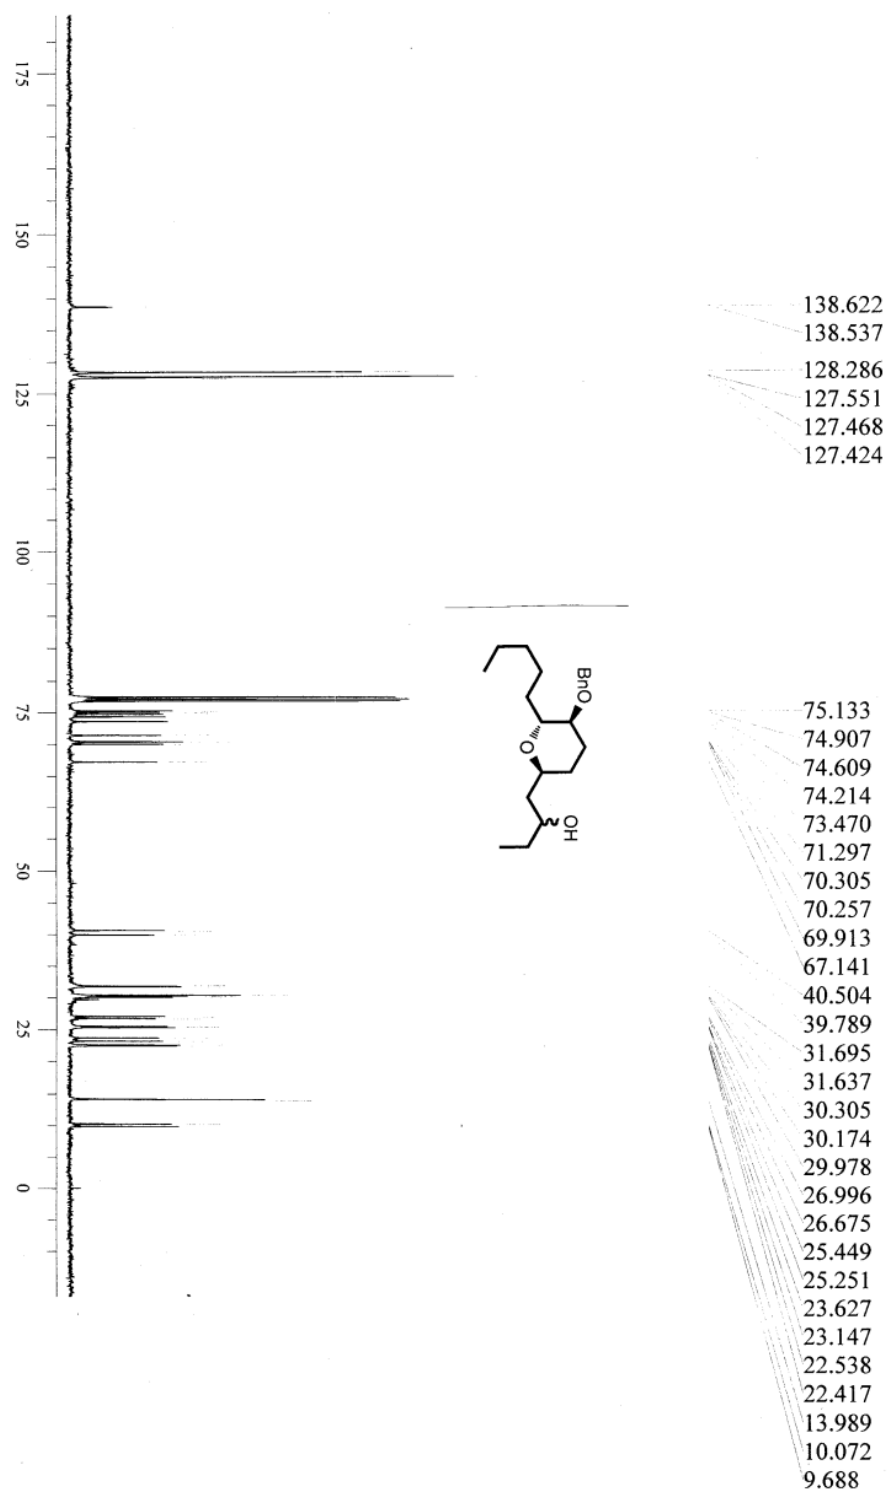

**<sup>13</sup>C NMR Spectrum of Compound 25 (100 MHz, CDCl<sub>3</sub>)**

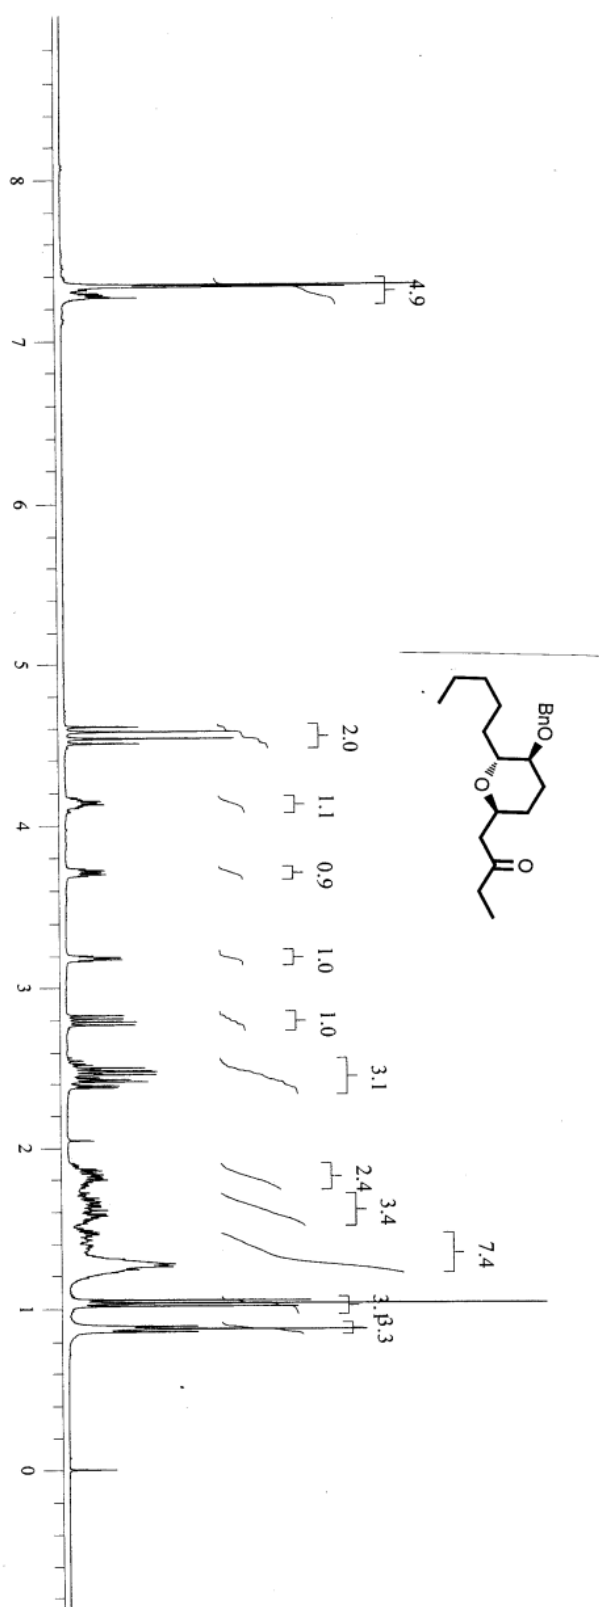

$^1\text{H}$  NMR Spectrum of Compound 17 (400 MHz,  $\text{CDCl}_3$ )

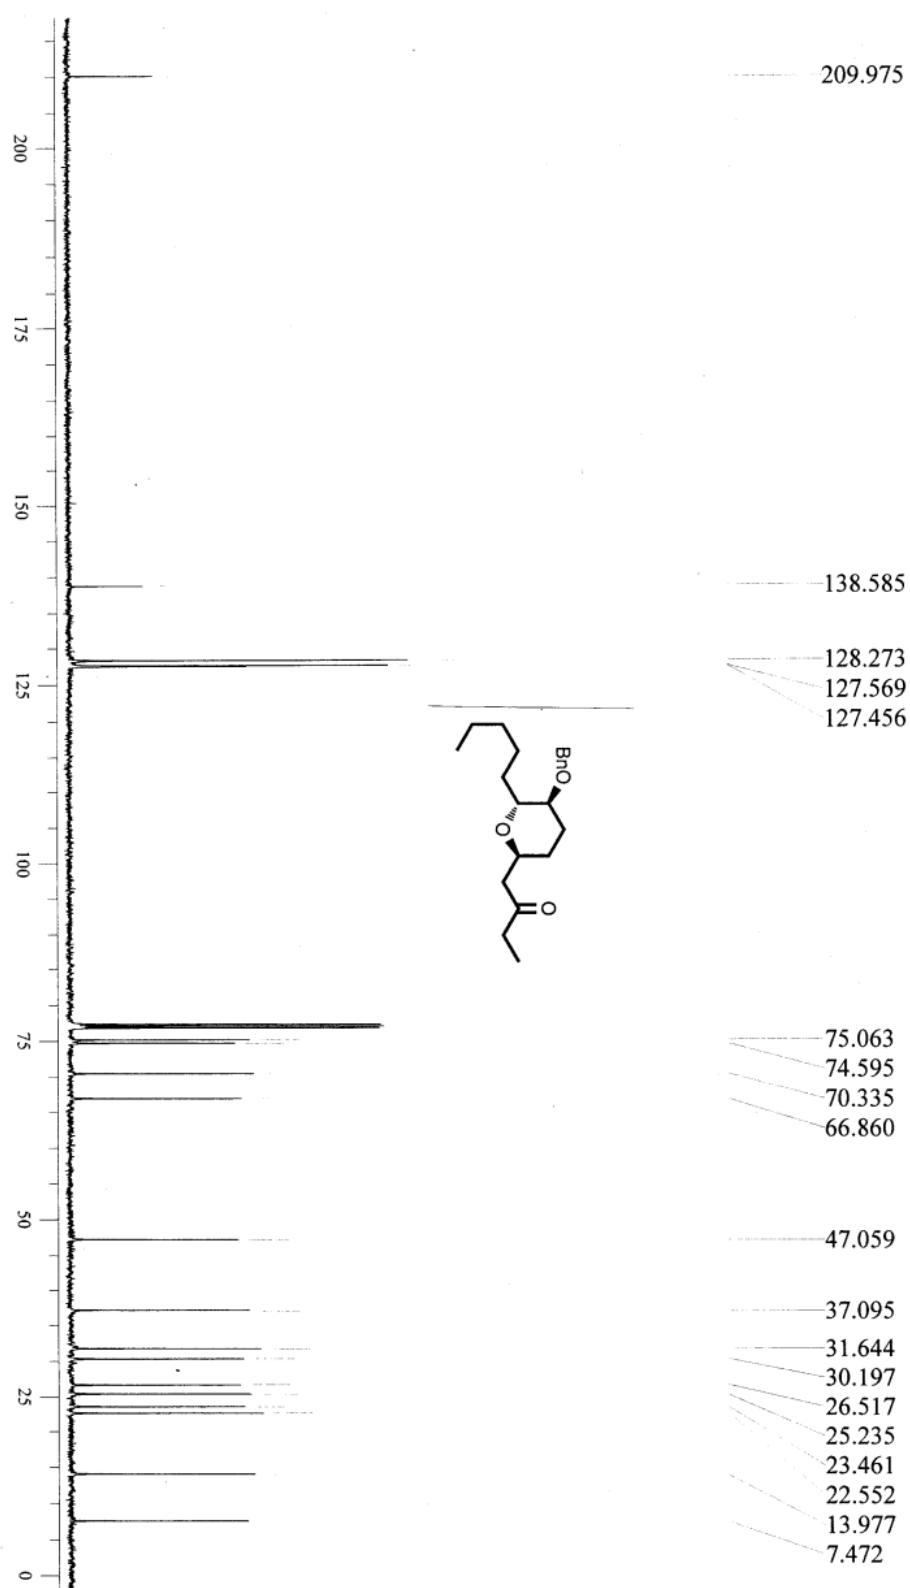

$^{13}\text{C}$  NMR Spectrum of Compound 17 (125 MHz,  $\text{CDCl}_3$ )

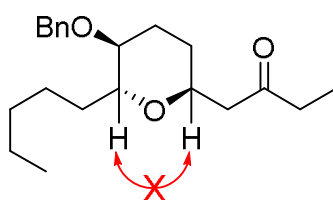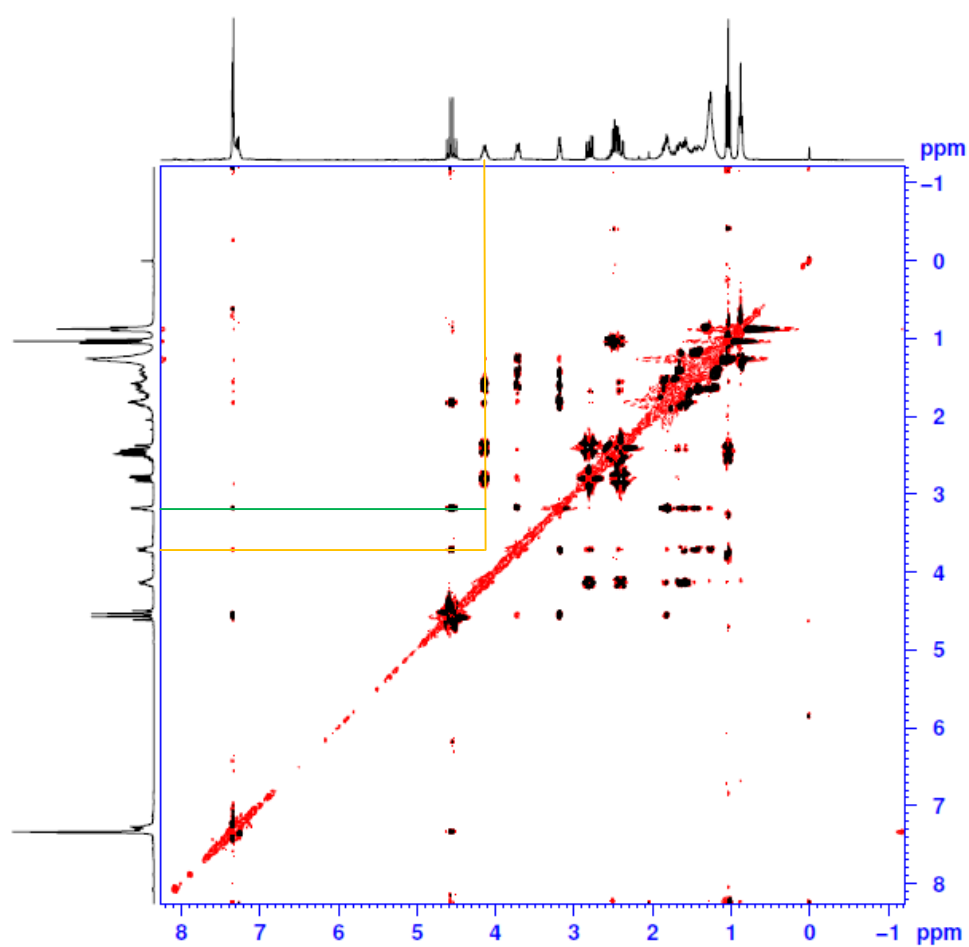

2D <sup>1</sup>H NOE of Compound 17 (300 MHz, CDCl<sub>3</sub>)

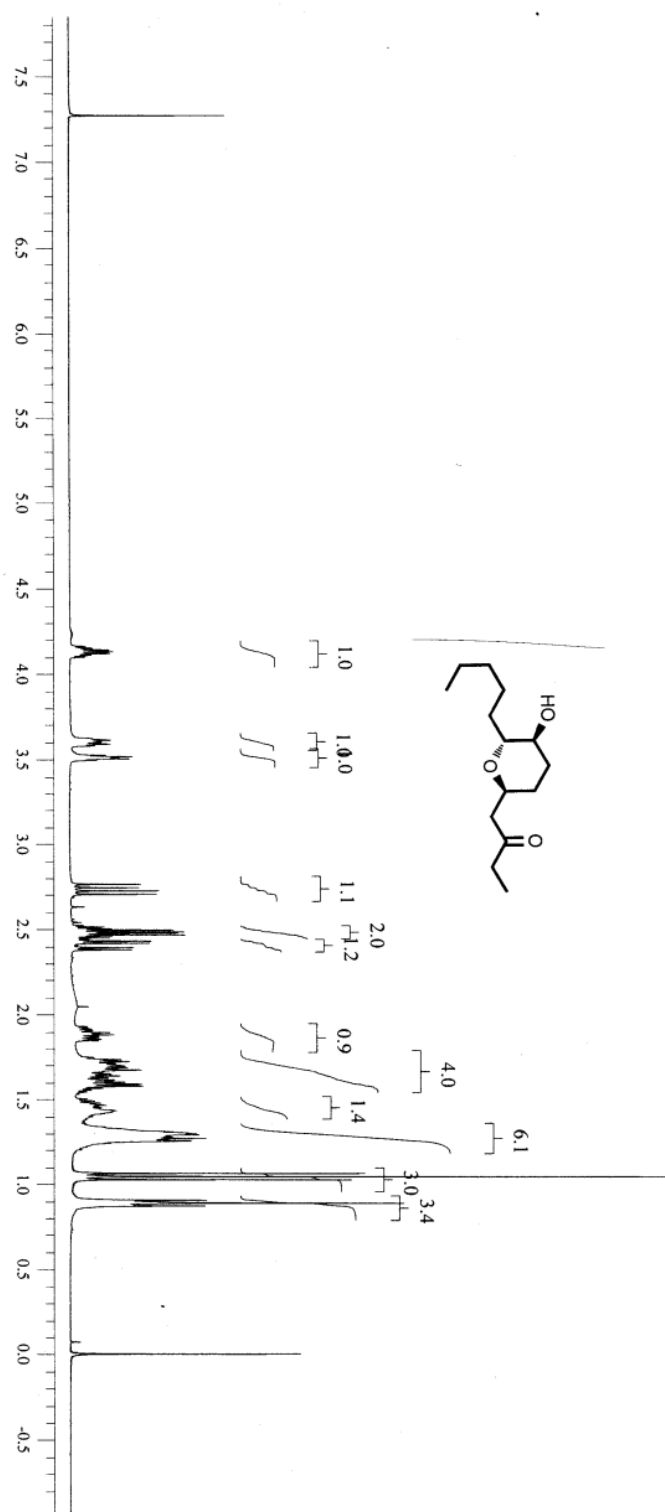

$^1\text{H}$  NMR Spectrum of Compound 14 (400 MHz,  $\text{CDCl}_3$ )

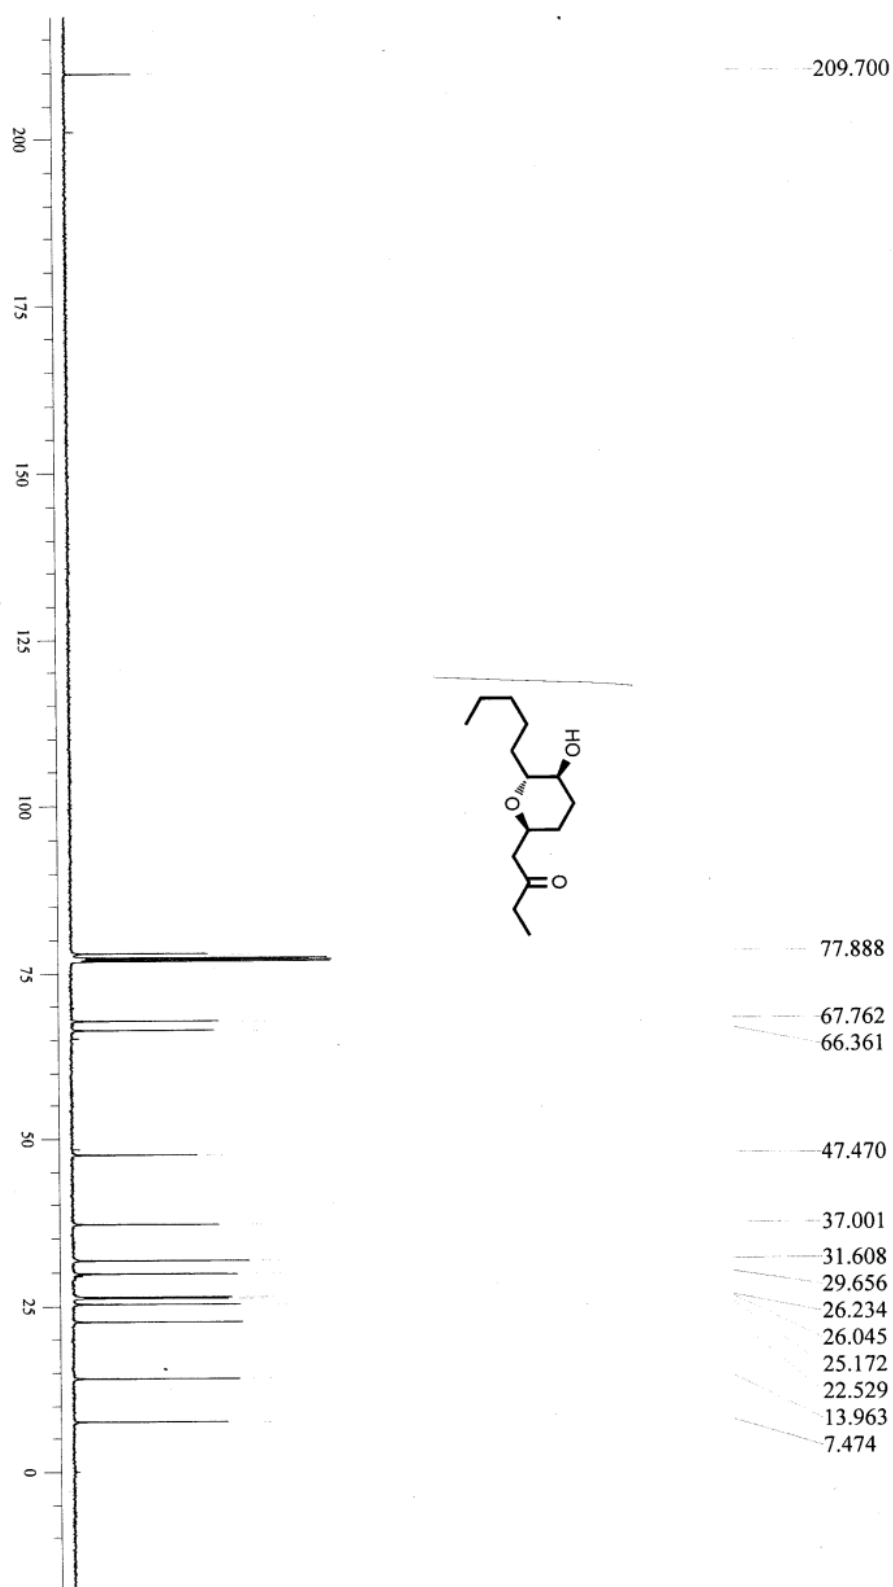

$^{13}\text{C}$  NMR Spectrum of Compound 14 (125 MHz,  $\text{CDCl}_3$ )



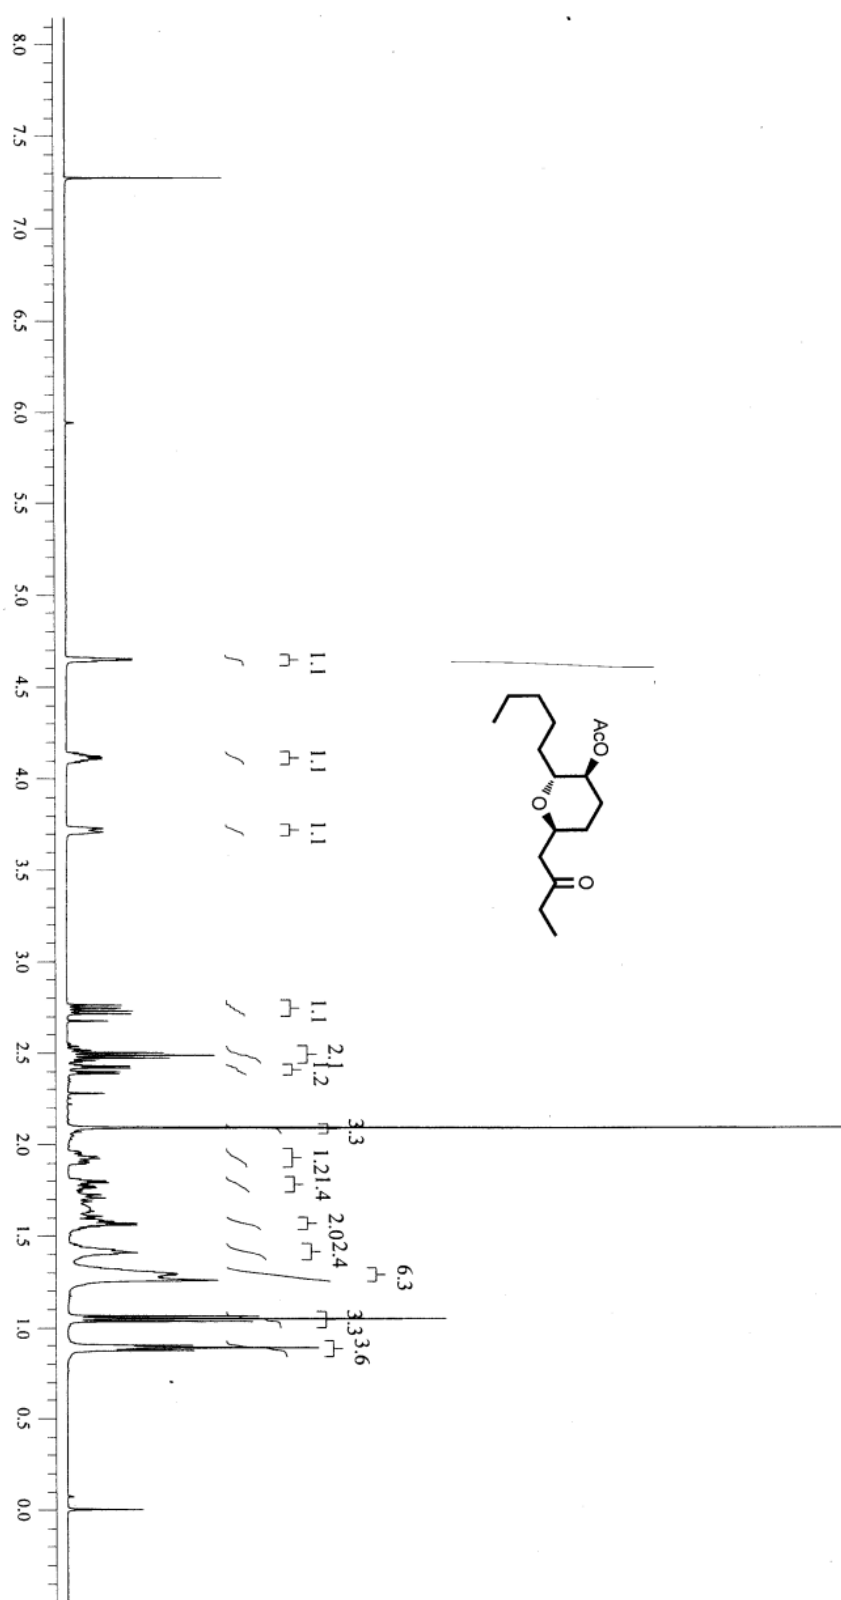

$^1\text{H}$  NMR Spectrum of Compound 15 (500 MHz,  $\text{CDCl}_3$ )

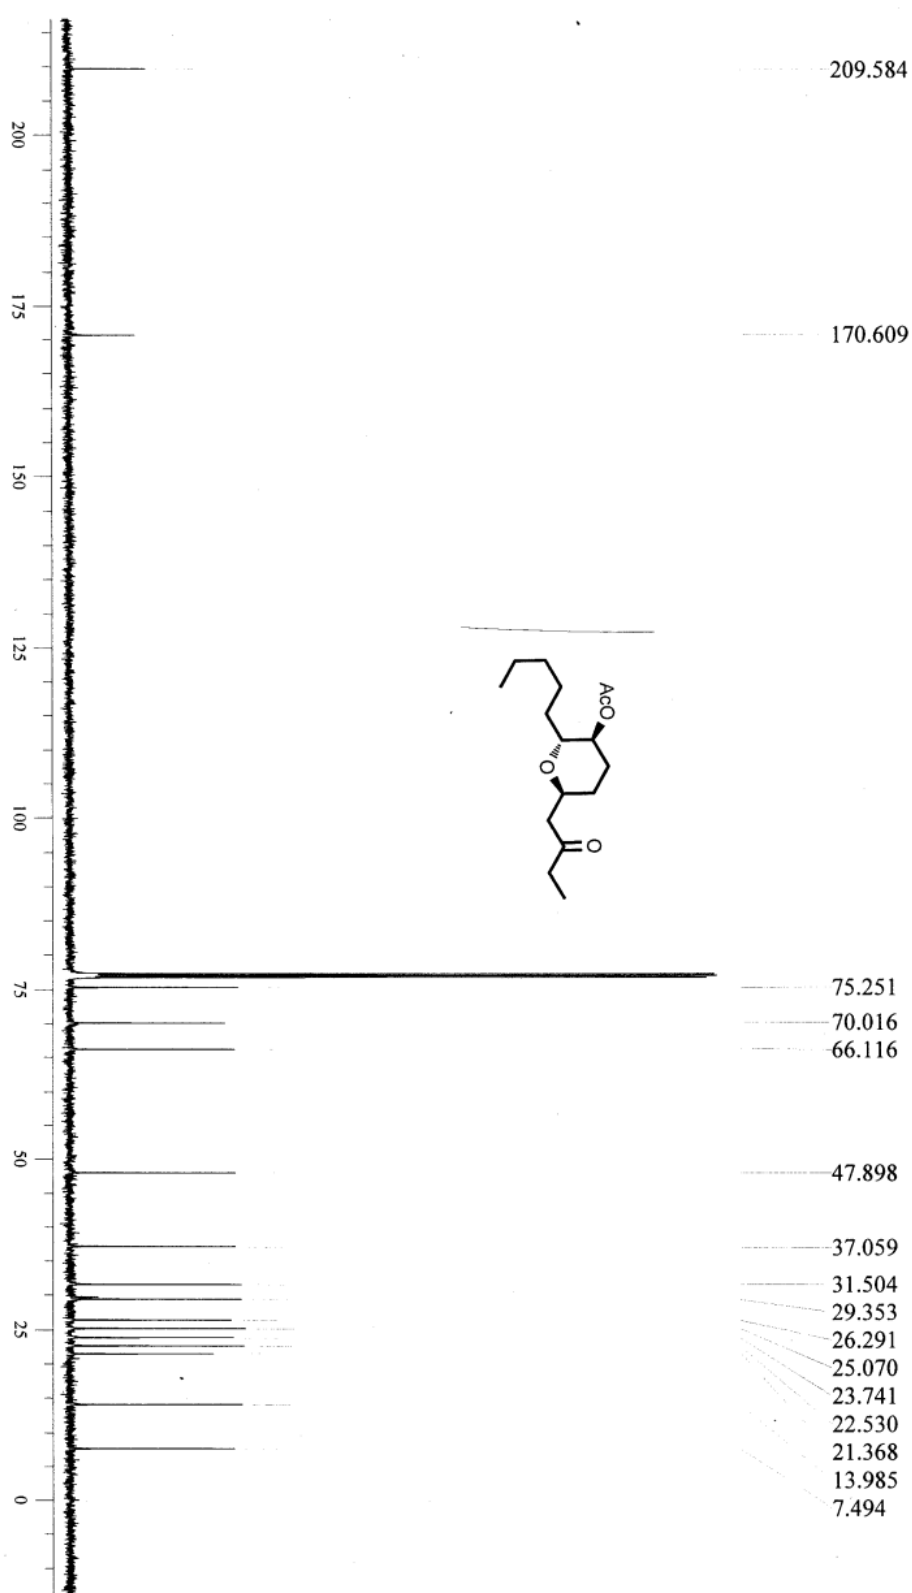

$^{13}\text{C}$  NMR Spectrum of Compound 15 (125 MHz,  $\text{CDCl}_3$ )

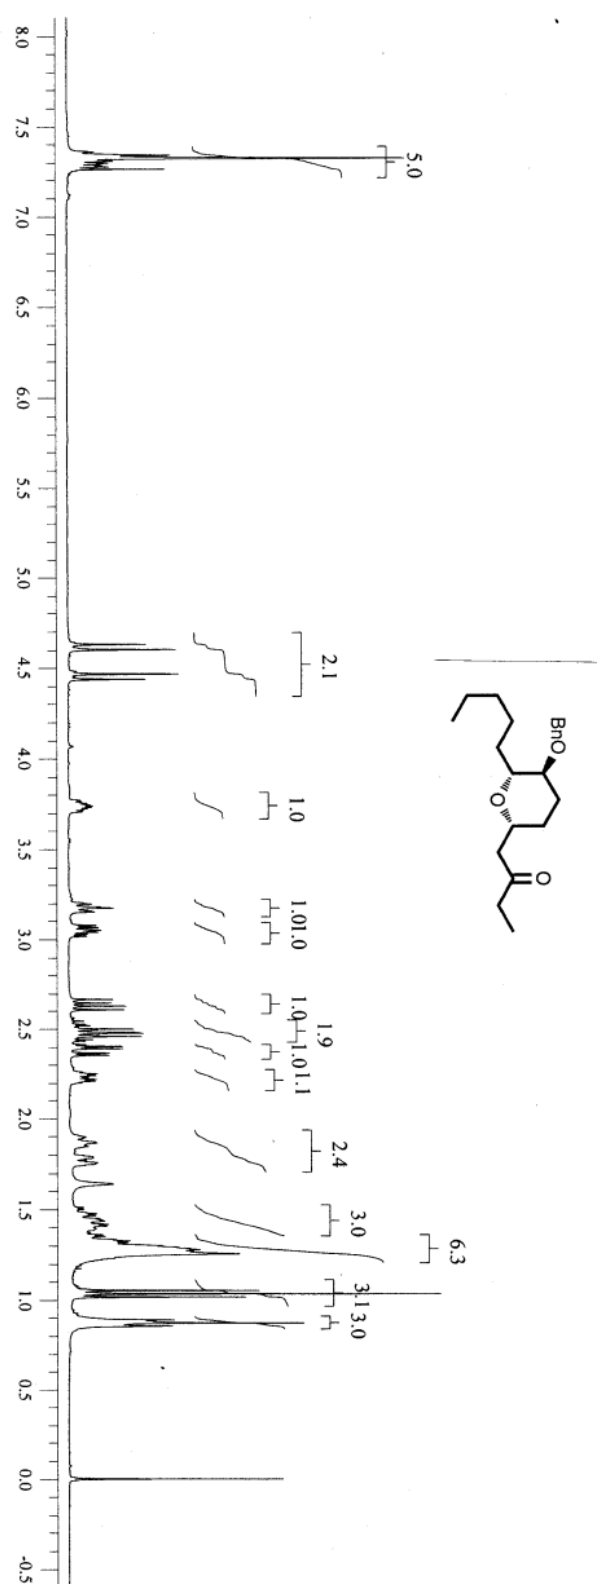

$^1\text{H}$  NMR Spectrum of Compound 16 (400 MHz,  $\text{CDCl}_3$ )

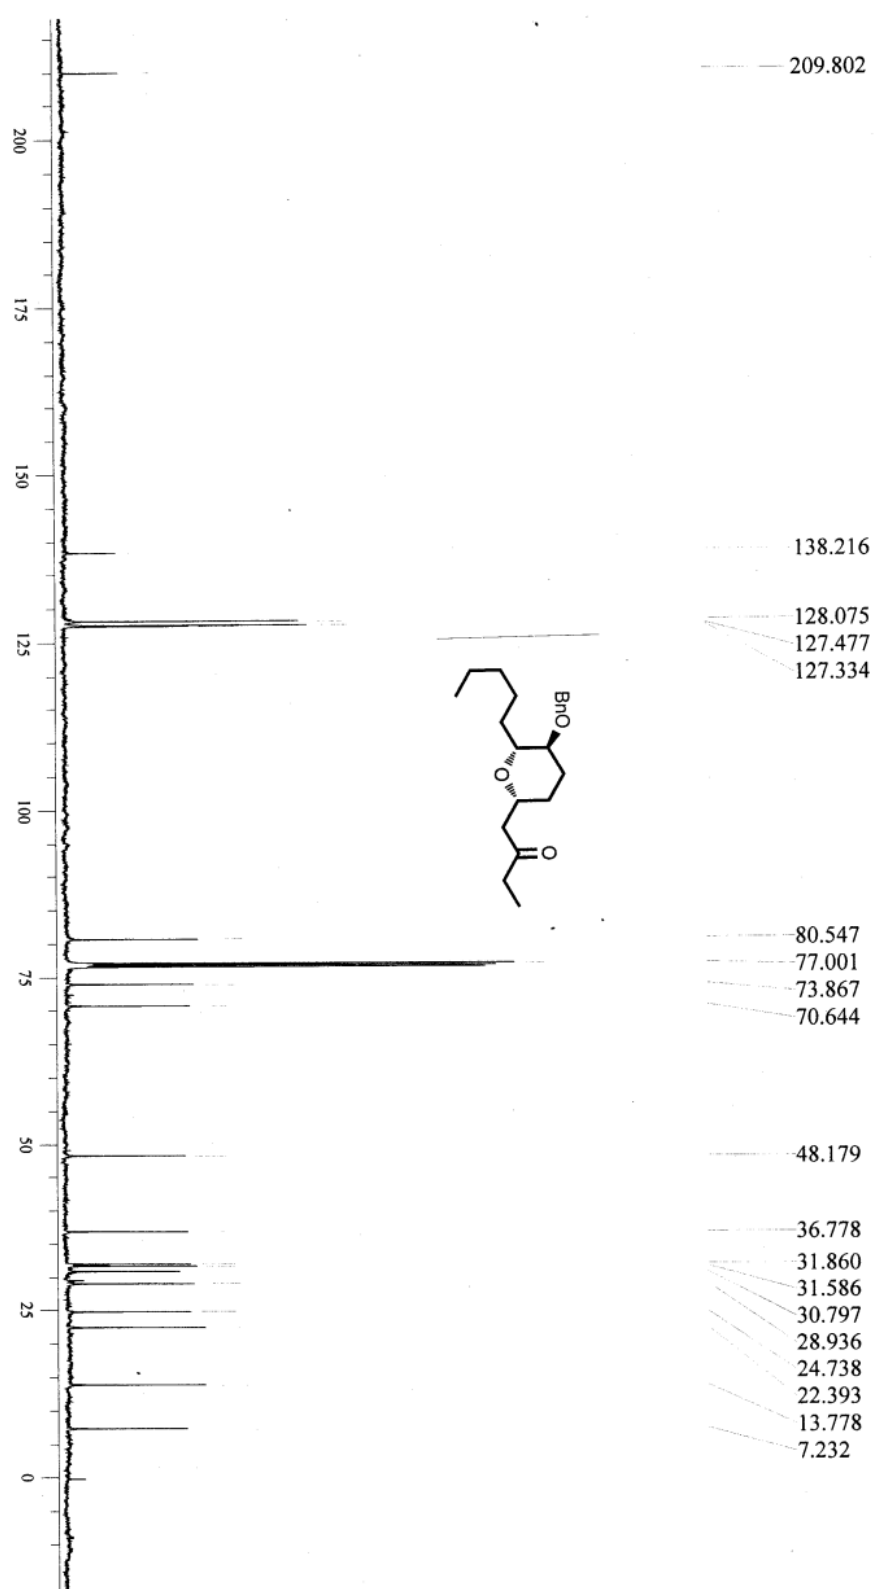

**<sup>13</sup>C NMR Spectrum of Compound 16 (125 MHz, CDCl<sub>3</sub>)**

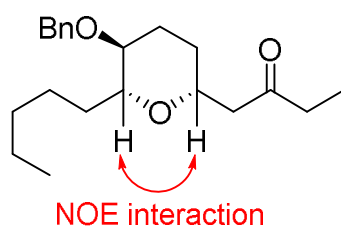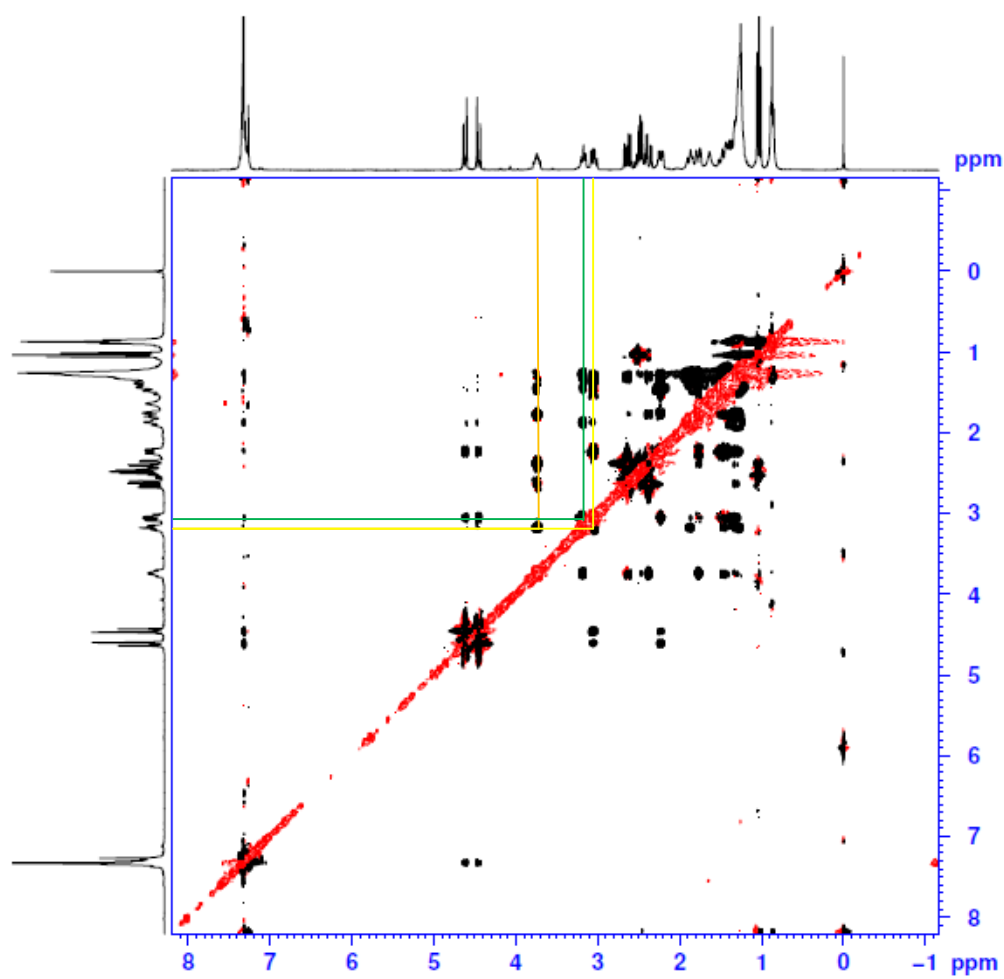

2D  $^1\text{H}$  NOE of Compound 16 (300 MHz,  $\text{CDCl}_3$ )

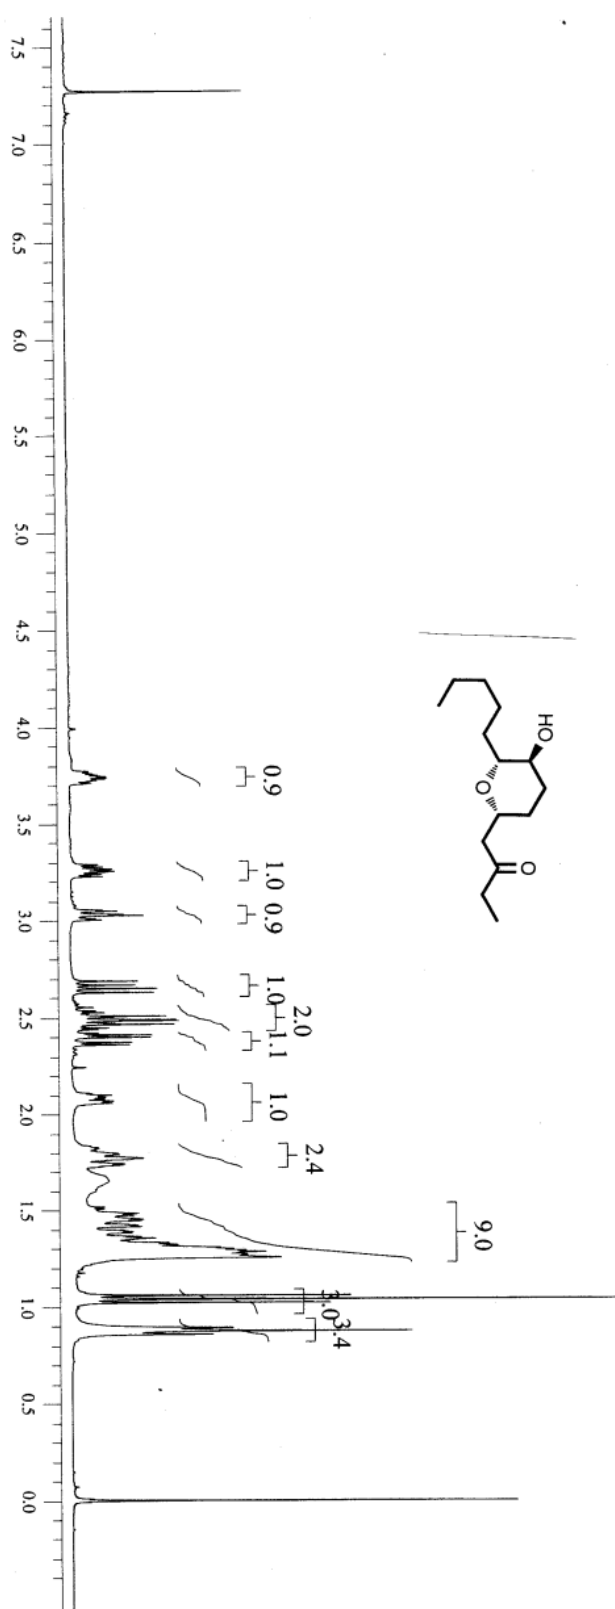

$^1\text{H}$  NMR Spectrum of Compound 12 (500 MHz,  $\text{CDCl}_3$ )

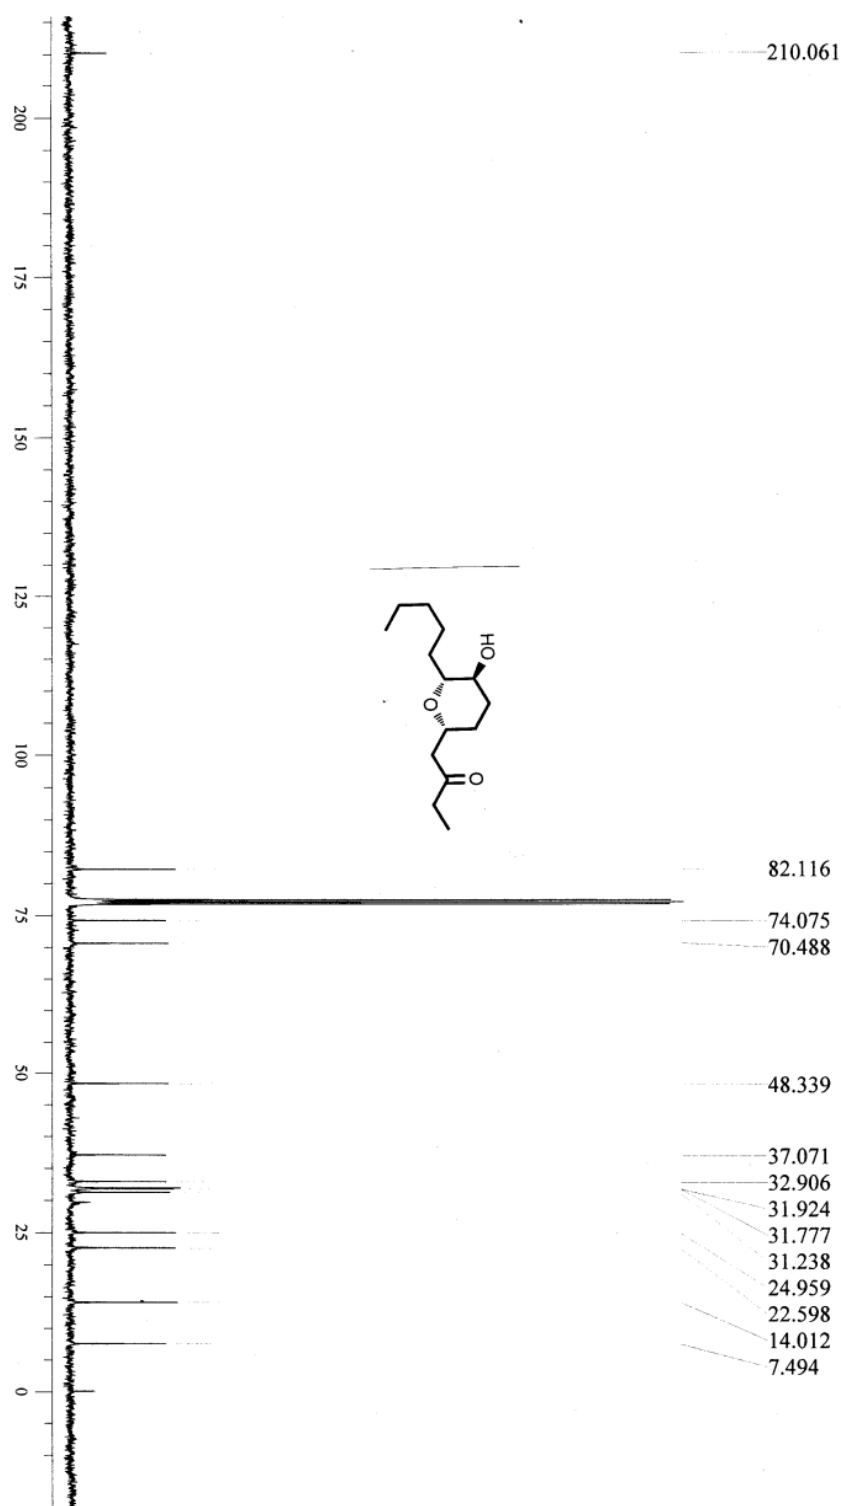

**<sup>13</sup>C NMR Spectrum of Compound 12 (100 MHz, CDCl<sub>3</sub>)**

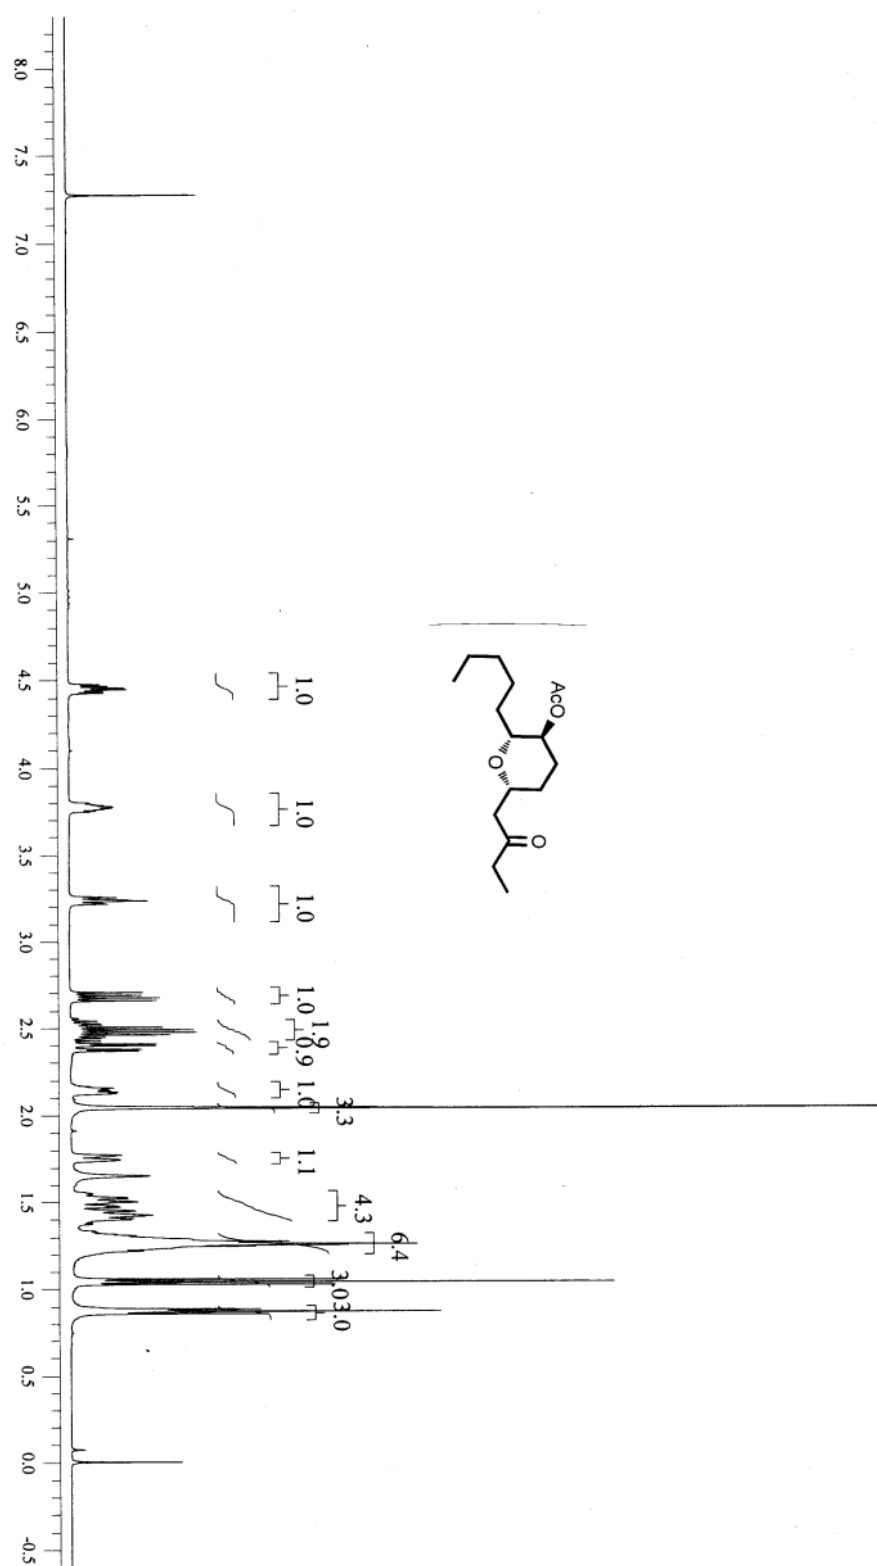

$^1\text{H}$  NMR Spectrum of Compound 13 (500 MHz,  $\text{CDCl}_3$ )



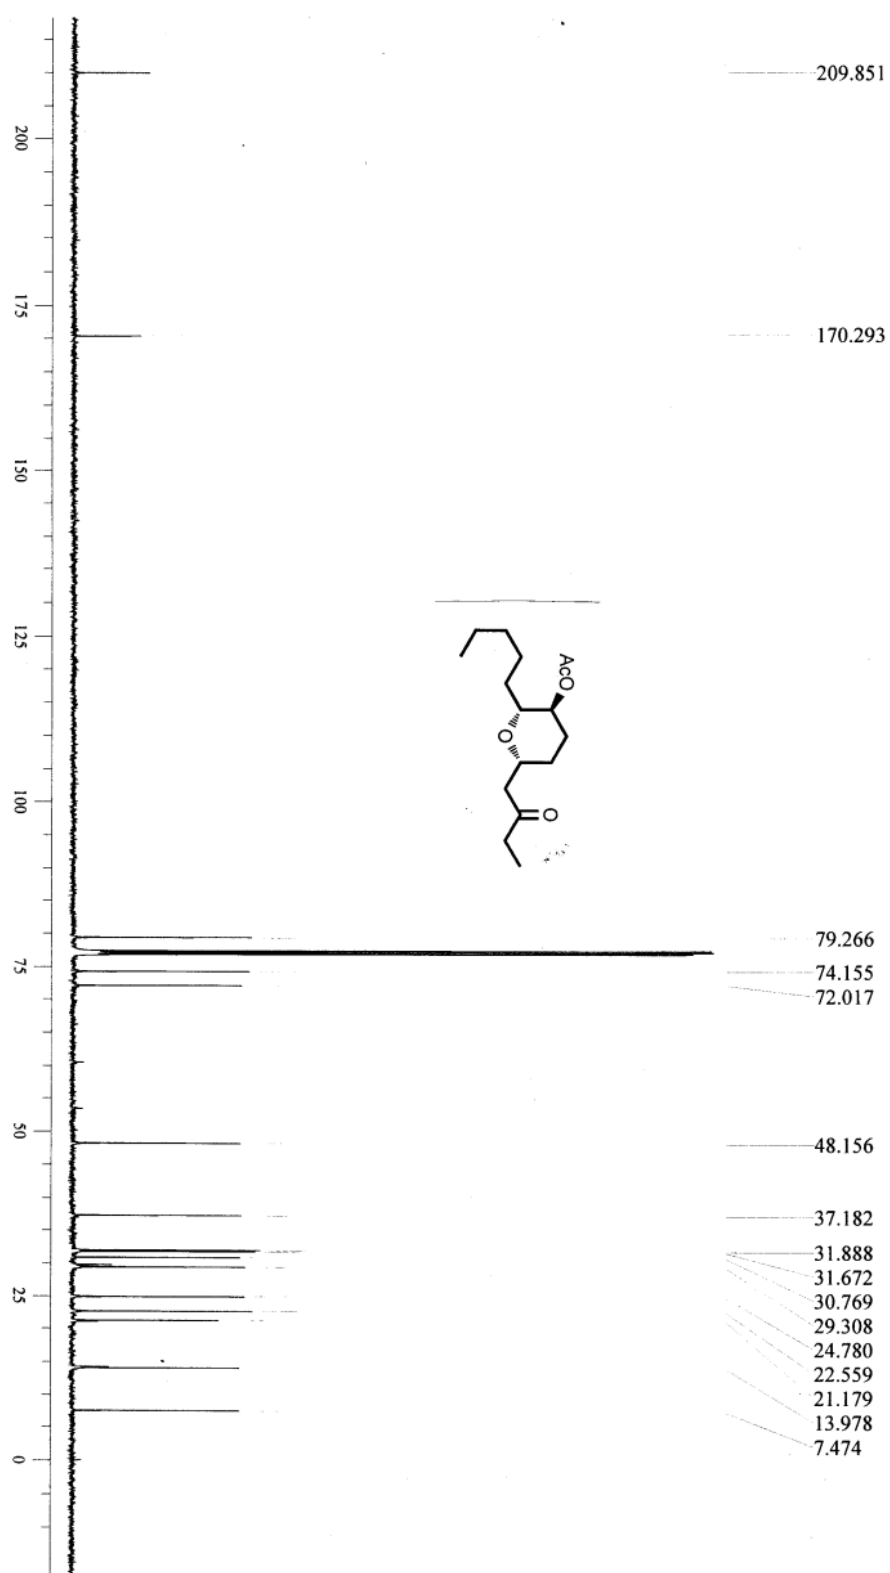

$^{13}\text{C}$  NMR Spectrum of Compound 13 (125 MHz,  $\text{CDCl}_3$ )
